# Supplementary material for: Littorally adaptive? Testing the link between habitat, morphology, and reproduction in the intertidal sculpin subfamily Oligocottinae (Pisces: Cottoidea)
Source: PeerJ. 2017 Aug 10;5:e3634. doi: 10.7717/peerj.3634 (PMC5554603; doi:10.7717/peerj.3634)
Supplement: Table S1 — Microsoft Excel (xlsx) format. See Buser & López (2015) for collection locality data and DNA isolation and amplification methodology. [file peerj-05-3634-s009.xlsx]

## Sheet: Sheet1 (3)
Supplementary Table 1: GenBank accession numbers for all sequences used in this study from the datset assembled in Buser and Lopez (2015). See Buser and Lopez (2015) for collection locality data and DNA isolation and amplification methodology. "Littorally adaptive? Testing the link between habitat, morphology, and reproduction in the intertidal sculpin subfamily Oligocottinae (Pizces: Cottoidea)"…
Genus	Species	Museum ID	EPIC 1777E10	EPIC 4174E20	COI	EGR1	MLL	ptchd1	Rhodopsin	SVEP1
Artedius	corallinus
		SIO 01-124	KP827413	KP827488	KP827292			KP827061		KP827244
Artedius	fenestralis
		UAM 6252	KP827419	KP827483	KP827283			KP827057	KP827162	KP827239
		UAM 6159	KP827421		KP827284		KP827613	KP827058	KP827163	KP827236
		UAM 6167	KP827420	KP827484	KP827285	KP826949	KP827614	KP827059		KP827238
Artedius	harringtoni
		UAM 6189	KP827411	KP827479	KP827279		KP827566	KP827056	KP827106	KP827241
		UAM 6186	KP827407	KP827480			KP827567	KP827053	KP827108	KP827182
		UAM 6163	KP827409		KP827282			KP827052
		UAM 6155	KP827408	KP827482	KP827281	KP826931		KP827054	KP827110
		UAM 6158	KP827410			KP826932	KP827564	KP827055	KP827109	KP827187
		UAM 4702	KP827406	KP827481	KP827280		KP827565	KP827051	KP827107
Artedius	lateralis
		UAM 6254	KP827414	KP827486	KP827290	KP826939	KP827615	KP827063	KP827161	KP827247
		UAM 2951	KP827418		KP827287			KP827064		KP827242
		UAM 2962	KP827416		KP827288	KP826941	KP827616	KP827062	KP827160	KP827245
		UAM 2976	KP827415		KP827291					KP827243
		UAM 2976	KP827417	KP827485	KP827289	KP826940	KP827617	KP827065		KP827246
Artedius	notospilotus
		SIO 04-2	KP827412	KP827487	KP827286			KP827060	KP827117	KP827240
Blepsias	cirrhosus
		UAM 2941	KP827461	KP827557	KP827340	KP826913	KP827631	KP826987	KP827087	KP827167
		UAM 2941	KP827462		KP827341			KP826988		KP827168
Chitonotus	pugetensis
		UW 151078	KP827436	KP827536	KP827356	KP826926	KP827561		KP827101	KP827253
		UW 151079	KP827439	KP827534	KP827360	KP826928			KP827105	KP827254
		UW 47298	KP827438	KP827538	KP827357	KP826929	KP827562		KP827104	KP827251
		UW 47675	KP827440	KP827535	KP827358	KP826927	KP827563	KP827071	KP827103	KP827255
		UW 47676	KP827437	KP827537	KP827359	KP826930		KP827072	KP827102	KP827252
Clinocottus	acuticeps
		UAM 6260	KP827426	KP827532	KP827298	KP826933	KP827607	KP827068	KP827154	KP827224
		UAM 6164	KP827431	KP827533	KP827293	KP826938	KP827608	KP827066	KP827155	KP827229
		UAM 6179	KP827433		KP827295					KP827226
		UAM 2947	KP827429			KP826935		KP827067	KP827157	KP827230
		UAM 2947	KP827430							KP827225
		UAM 2973	KP827428		KP827296	KP826937		KP827069	KP827158	KP827227
		UAM 2973	KP827427		KP827297	KP826936	KP827610	KP827070	KP827159	KP827228
		UAM 47693	KP827432	KP827531	KP827294	KP826934	KP827609		KP827156
		UAM 47693	KP827375	KP827513	KP827265		KP827574	KP827041	KP827150	KP827218
Clinocottus	analis
		UAM 4699	KP827386	KP827489	KP827314	KP826942	KP827571	KP827006	KP827119	KP827231
		SIO 06-42	KP827368	KP827491		KP826943	KP827568	KP827050	KP827115	KP827235
		N/A	KP827387	KP827492		KP826944	KP827570	KP827007	KP827121	KP827233
		N/A	KP827388	KP827493		KP826945		KP827004	KP827120	KP827232
		N/A	KP827389	KP827490		KP826947	KP827569	KP827005	KP827122	KP827234
Clinocottus	embryum
		UAM 6154	KP827374	KP827506	KP827269	KP826956	KP827579	KP827038	KP827114	KP827213
		UAM 6165	KP827378	KP827508	KP827261	KP826963	KP827580	KP827043	KP827146	KP827215
		UAM 6154	KP827379	KP827505	KP827263	KP826957	KP827581	KP827040	KP827149	KP827211
		UAM 4695	KP827380	KP827510	KP827262		KP827578	KP827042	KP827147	KP827217
		UAM_2948	KP827376	KP827509	KP827264	KP826962	KP827582	KP827044	KP827152	KP827219
		UAM 2974	KP827381	KP827507	KP827268	KP826961	KP827577	KP827039	KP827148	KP827212
		UAM 47694	KP827382	KP827511	KP827266		KP827576	KP827045		KP827214
		UAM 47694	KP827377	KP827512	KP827267		KP827575	KP827037	KP827151	KP827216
Clinocottus	globiceps
		UAM 6180	KP827370	KP827514	KP827277	KP826953	KP827586	KP827034	KP827118	KP827192
		UAM 6180	KP827373	KP827515	KP827274	KP826954	KP827588	KP827032	KP827141	KP827194
		UAM 6182	KP827371	KP827518	KP827273	KP826955	KP827591	KP827036	KP827145	KP827193
		UAM 2942	KP827383	KP827516	KP827278	KP826958	KP827590		KP827153	KP827195
		UAM 2968	KP827369	KP827519	KP827276	KP826959	KP827587	KP827033	KP827143	KP827197
		UAM 2975	KP827372	KP827517	KP827275	KP826960	KP827589	KP827035	KP827144	KP827196
Clinocottus	recalvus
		N/A	KP827390	KP827502	KP827272	KP826952	KP827583	KP827029	KP827140	KP827200
		N/A	KP827392	KP827503	KP827270	KP826950	KP827584	KP827030	KP827142	KP827202
		N/A	KP827391	KP827504	KP827271	KP826951	KP827585	KP827031		KP827201
Enophrys	bison
		UAM 6255	KP827467		KP827346					KP827183
		UAM 6186	KP827468	KP827552	KP827347	KP826915		KP827081	KP827088	KP827181
Enophrys	lucasi
		UAM 6160	KP827472	KP827553	KP827352	KP826916		KP827078	KP827089	KP827184
		UAM 6160	KP827473					KP827080		KP827186
		UAM 6160	KP827474		KP827353			KP827079		KP827185
Hemilepidotus	hemilepidotus
		UAM 6177	KP827464	KP827559	KP827338	KP826977	KP827630	KP826984	KP827100	KP827258
Hemilepidotus	jordani
		UAM 2938	KP827465	KP827560	KP827339	KP826978		KP826985		KP827259
Hemitripterus	bolini
		UAM 2936	KP827460		KP827342	KP826912	KP827632	KP826990		KP827169
Hexagrammos	lagocephalus
		UAM 6256	KP827469					KP827082		KP827165
		UAM 2937	KP827470		KP827344			KP827085
Icelinus	filamentosus
		KU 28049	KP827475	KP827549	KP827336	KP826976		KP827003	KP827086	KP827191
Icelus	spiniger
		UAM 4703	KP827453	KP827539	KP827334		KP827629	KP827001		KP827180
		UAM 4703	KP827454	KP827540	KP827335			KP827002
Leiocottus	hirundo
		SIO 08-60	KP827384	KP827498	KP827317	KP826948	KP827572	KP827008	KP827123	KP827248
		N/A	KP827385	KP827499	KP827318	KP826946	KP827573	KP827009	KP827124	KP827249
Leptocottus	armatus
		UAM 6174	KP827476	KP827554	KP827354	KP826979		KP826980	KP827164	KP827256
		UAM 6174	KP827477		KP827355			KP826981		KP827257
Myoxocephalus	jaok
		UAM 6246	KP827458		KP827351			KP827077
Myoxocephalus	polyacanthocephalus
		UAM 6257	KP827455	KP827550	KP827348			KP827074		KP827188
		UAM 6257	KP827457		KP827349			KP827075		KP827190
		UAM 6168	KP827456	KP827551	KP827350	KP826917	KP827628	KP827076	KP827090	KP827189
Oligocottus	maculosus
		UAM 4698	KP827364		KP827299
		UAM 6259	KP827367	KP827525	KP827300	KP826964	KP827595	KP827013	KP827138	KP827203
		UAM 6188	KP827361	KP827527	KP827303		KP827597	KP827015	KP827139	KP827205
		UAM 6178	KP827365	KP827529	KP827304	KP826967	KP827601	KP827017	KP827135	KP827206
		UAM 6166	KP827362	KP827526	KP827301	KP826965	KP827596	KP827018	KP827136	KP827207
		UAM 6181	KP827363	KP827528	KP827302	KP826966	KP827598	KP827016	KP827137	KP827208
		UAM 6154	KP827366		KP827305			KP827014		KP827204
Oligocottus	rimensis
		UAM 2955	KP827422	KP827530	KP827319	KP826972		KP827046	KP827127
		UAM 2945	KP827425		KP827321	KP826974	KP827611	KP827047	KP827128
		UAM 2964	KP827423		KP827320	KP826973	KP827612	KP827048	KP827125	KP827237
		UAM 2964	KP827424		KP827322	KP826975		KP827049	KP827126
Oligocottus	rubellio
		N/A	KP827434	KP827494	KP827315		KP827599	KP827019	KP827116
		N/A	KP827435	KP827495	KP827316		KP827600	KP827020	KP827134
Oligocottus	snyderi
		UAM 4700	KP827393		KP827308
		UAM 2946	KP827396		KP827312			KP827021		KP827209
		UAM 2946	KP827400	KP827520	KP827313	KP826968	KP827602	KP827025	KP827129	KP827210
		UAM 4683	KP827398	KP827521	KP827309	KP826970	KP827604	KP827024	KP827131	KP827198
		UAM 4683	KP827399	KP827522	KP827310		KP827603	KP827026	KP827130
		UAM 2972	KP827397		KP827306			KP827022	KP827133
		UAM 2972	KP827401	KP827524		KP826969	KP827605	KP827027	KP827132
		UAM 2978	KP827394		KP827311			KP827028
		UAM 2979	KP827395	KP827523	KP827307	KP826971	KP827606	KP827023		KP827199
Orthonopias	triacis
		UAM 4701	KP827404	KP827496			KP827592	KP827012		KP827220
		SIO 03-166	KP827405	KP827500				KP827010		KP827221
		N/A	KP827402	KP827497			KP827594		KP827111	KP827223
		N/A	KP827403	KP827501			KP827593	KP827011	KP827112	KP827222
Percis	japonicus
		UAM 2935	KP827463	KP827558				KP826989
Phallocottus	obtusus
		UAM 4697	KP827441		KP827323			KP826991		KP827170
		UAM 4697	KP827442		KP827324			KP826992		KP827171
Podothecus	veterus
		UW 125588	KP827459	KP827556		KP826911		KP826986	KP827113	KP827260
Radulinus	taylori
		UAM 6191	KP827478		KP827345			KP827073
Rhamphocottus	richardsoni
		UAM 2940	KP827471	KP827555	KP827343	KP826914		KP826982	KP827099	KP827166
Sigmistes	caulias
		UAM 47726	KP827443	KP827541	KP827328	KP826921	KP827622	KP826998	KP827091	KP827178
		UAM 47684	KP827446	KP827547	KP827329	KP826920	KP827626	KP826995	KP827097	KP827174
		UAM 47715	KP827444	KP827542	KP827330	KP826922	KP827623	KP826999	KP827094	KP827176
		UAM 47715	KP827447	KP827546	KP827332	KP826919	KP827624	KP826993	KP827095	KP827175
		UAM 47705	KP827445	KP827543	KP827333	KP826923	KP827625	KP827000	KP827096	KP827179
		UAM 47706	KP827448	KP827545	KP827331	KP826924	KP827627	KP826994	KP827092	KP827177
Sigmistes	smithi
		UAM 47712	KP827449		KP827325	KP826925	KP827618	KP826996	KP827093	KP827172
		UAM 47727	KP827451	KP827544	KP827326	KP826918	KP827620	KP826997	KP827098	KP827173
		UAM 47727	KP827452		KP827327		KP827621	KP827084
		UAM 47727	KP827450				KP827619	KP827083
Triglops	scepticus
		UAM 4704	KP827466	KP827548	KP827337			KP826983		KP827250
