# Supplementary material for: Littorally adaptive? Testing the link between habitat, morphology, and reproduction in the intertidal sculpin subfamily Oligocottinae (Pisces: Cottoidea)
Source: PeerJ. 2017 Aug 10;5:e3634. doi: 10.7717/peerj.3634 (PMC5554603; doi:10.7717/peerj.3634)
Supplement: Table S2 — Microsoft Excel (xlsx) format. Museum records where “tide pool” or the like is explicitly stated as the collection locality are highlighted in light green. [file peerj-05-3634-s011.xlsx]

## Sheet: Sheet1
Supplementary Table 2: Museum collection data for all 16 species of the subfamily Oligocottinae and the outgroup taxon Chitonotus pugetensis. Museum records where "tide pool" or the like is explicitly stated as the collection locality are highlighted in light green. "Littorally adaptive? Testing the link between habitat, morphology, and reproduction in the intertidal sculpin subfamily Oligocottin…
										Column descriptions:
CatNum	Taxon	Country	State	County	LocalityRemarks	Latitude	Depth (m)			CatNum = the museum catalog number of the record, with the museum abbreviation preceding the catalog number and separated by a space. Museum abbreviations are as follows:
SU 35364	Artedius corallinus	United States	California	Monterey	Tidepool	36.5194	0			CAS = California Academy of Science
SU 40881	Artedius corallinus	United States	California	Monterey	Intertidal	36.5175	0			LACM = Natural History Museum of Los Angeles County
LACM Fish:1989	Artedius corallinus	Mexico	Baja California		Tidepool	30.4833	0			OS = Oregon State University Fish Collection
LACM Fish:31698.003	Artedius corallinus	United States	California	San Luis Obispo		35.2108	0			SIO = Scripps Institute of Oceanography Marine Vertebrates Collections
LACM Fish:31699.003	Artedius corallinus	United States	California	San Luis Obispo		35.2118	0			SU = California Academy of Sciences (this is not a typo, these catalog number are relics from the old Stanford University fish collection, which was absorbed by CalAcad)
LACM Fish:31700.002	Artedius corallinus	United States	California	San Luis Obispo		35.2108	0			UAM = University of Alaska Museum
LACM Fish:31701.001	Artedius corallinus	United States	California	San Luis Obispo		35.2108	0			UBC = University of British Columbia Beaty Biodiversity Museum
LACM Fish:31859.002	Artedius corallinus	United States	California	San Luis Obispo		35.2162	0			UMMZ = University of Michigan Museum of Zoology
LACM Fish:32671.019	Artedius corallinus	United States	California	San Luis Obispo		35.2162	0			UW = University of Washington Burke Museum Fish Collection
LACM Fish:47729.003	Artedius corallinus	United States	California	Los Angeles		33.7278	0
LACM Fish:47788.002	Artedius corallinus	United States	California	Santa Barbara		34.0147	0			Taxon = Scientific name of species.
LACM Fish:47826.001	Artedius corallinus	United States	California	Los Angeles	Tidepool	33.7368	0
LACM Fish:48144.003	Artedius corallinus	United States	California	Los Angeles		33.7367	0			Country = Country where specimen was collected
LACM Fish:48359.001	Artedius corallinus	United States	California	Ventura		33.2886	0
LACM Fish:48555.001	Artedius corallinus	United States	California	Los Angeles	Tidepool	33.7516	0			State = State where specimen was collected
LACM Fish:49261.001	Artedius corallinus	United States	California	Los Angeles	Tidepool	33.7658	0
LACM Fish:52130.001	Artedius corallinus	Mexico	Baja California			31.75	0			County = County where specimen was collected
LACM Fish:52248.035	Artedius corallinus	United States	California	Monterey		35.9117	0
LACM Fish:9393.002	Artedius corallinus	United States	California	San Luis Obispo		35.3553	0			LocalityRemarks = Remarks on collection locality, i.e., whether the specimen was collected in a tide pool
SIO 47-17	Artedius corallinus	United States	California	San Diego Co.: Point Loma: S of Sunset Cliffs; pools	Tidepool	32.7083	0
SIO 72-90	Artedius corallinus	Mexico	Baja California Norte	E of N tip of North Coronado Island; 100 ft		35.65	0.3048			VerbatimLatitude = Decimal degrees of latitude of collection location.
SIO 45-20	Artedius corallinus	United States	California	San Diego Co.: Point Loma		32.2617	0.9144
SIO 45-6	Artedius corallinus	Mexico	Baja California Norte	S side of Punta Banda (El Papalote)		32.8133	0.9144			Depth(m) = Collection depth in meters.
SIO 46-21	Artedius corallinus	United States	California	San Diego Co.: off Internat'l Border, N of Tijuana River		32.85	1.0668
SIO 45-215A	Artedius corallinus	United States	California	Santa Barbara Co.: San Miguel Island: Cuyler Harbor; 35 yd		31.54	1.2192
SIO 46-19	Artedius corallinus	United States	California	Cortes Bank, base of smaller buoy		32.85	1.2192
SIO 51-29	Artedius corallinus	United States	California	San Diego Co.: La Jolla: reef W of Bird Rock; 20 yd		31.73	1.524
LACM Fish:31992.005	Artedius corallinus	United States	California			33.7269	2.4
SIO 67-298	Artedius corallinus	United States	California	San Diego Co.: San Diego Bay, 100 yd W of Ballast Point; 100 ft		35.6667	2.7432
SIO 51-21	Artedius corallinus	United States	California	San Diego Co.: La Jolla: reef just NW of Bird Rock; reef		31.7167	3.048
SIO 52-201	Artedius corallinus	Mexico	Baja California Norte	Punta Banda, in Papalote Bay; 0.3 mi		29.1	3.048
SU 29536	Artedius corallinus	United States	California	Monterey		36.6219	4.572
SIO 54-188	Artedius corallinus	United States	California	San Clemente Island: Wilson's Cove; 100 ft		34.0167	4.572
SIO 60-488	Artedius corallinus	Mexico	Baja California Norte	E side of Punta Cono; 75 ft		32.7667	4.572
LACM Fish:31301.001	Artedius corallinus	United States	California	San Luis Obispo		35.2108	6
SIO 51-259	Artedius corallinus	Mexico	Baja California Norte	Punta Banda, bay NW of Los Arbolitos; 75 ft		34.0567	6.096
SIO 51-249	Artedius corallinus	United States	California	Santa Barbara Co.: San Miguel Island: Cuyler Harbor		34.025	7.62
SIO 52-164	Artedius corallinus	Mexico	Baja California Norte	off So Coronado Island, just to SW of so. tip		28.75	7.62
SIO 59-305	Artedius corallinus	United States	California	San Diego Co.: La Jolla kelp beds; 0.75 mi		31.8	7.62
SIO 62-475	Artedius corallinus	United States	California	Santa Cruz Island: Forney's Cove; 20 yd		31.8	7.62
LACM Fish:6582.002	Artedius corallinus	United States	California	San Luis Obispo		35.6322	9
SIO 51-239	Artedius corallinus	United States	California	Santa Cruz Island: W point of Pelican Bay; 5-30 yd		34.0333	9.144
SIO 52-168	Artedius corallinus	United States	California	San Luis Obispo Co.: San Simeon, N of point		28.8667	9.144
SIO 52-202	Artedius corallinus	United States	California	San Diego Co.: off tip of Point Loma		29.1117	9.144
SIO 55-73A	Artedius corallinus	United States	California	N of Point Loma		32.9	9.144
CAS 30736	Artedius corallinus	United States	California	Monterey		36.6089	10.668
SIO 54-191	Artedius corallinus	Mexico	Baja California Norte	8 mi S of Coronado Islands; 8 mi		34.0583	10.668
SIO 59-307	Artedius corallinus	United States	California	W side of Santa Catalina Island; 20 yd		31.8	10.668
SIO 72-86	Artedius corallinus	Mexico	Baja California Norte	S side of Punta Rocosa; 200 ft		35.65	10.668
LACM Fish:35912.001	Artedius corallinus	United States	California			33.0407	10.7
CAS 27700	Artedius corallinus	United States	California	Mendocino		38.9156	12.192
SIO 54-190	Artedius corallinus	Mexico	Baja California Norte	Bahia Todos Santos: 1 mi W of RinconCamp; 200 ft		34.0583	12.192
SIO 01-124	Artedius corallinus	United States	California	San Diego Co.: La Jolla: reef just S of Bird Rock; reef		32.8133	12.4968
LACM Fish:52228.001	Artedius corallinus	United States	California	San Luis Obispo		35.644	13.7
SIO 59-354	Artedius corallinus	United States	California	Santa Barbara Co.: Santa Rosa Island: Beicher's Beach; 100 yd		32.85	13.716
CAS 28838	Artedius corallinus	United States	California	Mendocino		38.9139	15.24
CAS 50412	Artedius corallinus	United States	California	Monterey		36.6088	15.24
SIO 51-227	Artedius corallinus	United States	California	Cortes Bank, ca 100mi WSW of San Diego		33.3833	15.24
SIO 51-230	Artedius corallinus	Mexico	Baja California Norte	1.9 mi E of Punta Descanso; reef		33.3833	15.24
SIO 51-244	Artedius corallinus	United States	California	Orange Co.: off W side of San Clemente Island; 0.75 mi		34.0383	16.764
CAS 56959	Artedius corallinus	United States	California			34.0651	18.288
SIO 49-165	Artedius corallinus	United States	California	Santa Cruz Island: Pelican Bay; 30 yd		32.4083	18.288
SIO 49-183	Artedius corallinus	United States	California	San Luis Obispo Co.: San Simeon, N of Hearst Monument		32.85	18.288
SIO 58-110	Artedius corallinus	United States	California	San Diego Co.: La Jolla: off Scripps Hospital		32.6833	18.288
SIO 67-139	Artedius corallinus	Mexico	Baja California Norte	Bahia Playa Maria, inside outer point		32.6833	18.288
LACM Fish:48287.001	Artedius corallinus	United States	California	Santa Barbara		34.0192	18.3
SIO 55-77	Artedius corallinus	United States	California	San Diego Co.: off tip of Point Loma, near Whistling Buoy		32.85	22.86
SIO 48-297	Artedius corallinus	United States	California	Santa Catalina Island: Avalon; 35 yd		32.6833	23.7744
CAS 232842	Artedius corallinus	Mexico	Baja California			32.3947	24.6888
SIO 49-152	Artedius corallinus	United States	California	San Diego Co.:Point Loma, ca 0.5 mi S of sewerpipe; 1.5 mi		32.55	25.6032
SIO 59-255	Artedius corallinus	United States	California	San Diego Co.: La Jolla: off Childrenâ€™s Pool		32.5	25.908
SIO 63-1024	Artedius corallinus	United States	California	San Luis Obispo Co.: Piedras Blancas lighthouse; 13 ft		32.6833	25.908
SIO 63-198	Artedius corallinus	United States	California	San Diego Co.: La Jolla, off Bird Rock		32.4433	25.908
LACM Fish:9285.003	Artedius corallinus	Mexico	Baja California			32.4	27
SIO 48-290	Artedius corallinus	Mexico	Baja California Norte	reef 0.25 mi WNW of Rio Santo Tomas; reef		32.6833	27.432
SIO 63-4	Artedius corallinus	United States	California	Santa Cruz Island: E point of Smugglers Cove; 10 yd		32.4433	28.956
SIO 55-75	Artedius corallinus	Mexico	Baja California Norte	reef on S side of Bahia Todos Santos		32.9	30.48
SIO 56-17	Artedius corallinus	Mexico	Baja California Norte	0.5 mi N of Punta Blanca; 75 ft		32.55	30.48
LACM Fish:31700.004	Artedius fenestralis	United States	California	San Luis Obispo		35.2108	0
CAS 25164	Artedius fenestralis	United States	California	Del Norte	Tidepool	41.7833	0
CAS 31289	Artedius fenestralis	United States	California	Del Norte	Tidepool	41.7757	0
SU 16662	Artedius fenestralis	United States	California	Del Norte	Tidepool	41.7757	0
CAS 31290	Artedius fenestralis	United States	California	Del Norte	Tidepool	40.7221	0
SU 16676	Artedius fenestralis	United States	California	Del Norte	Tidepool	41.7757	0
CAS 27315	Artedius fenestralis	United States	California	Marin	Tidepool	37.8833	0
OS Fishes:9206	Artedius fenestralis	United States	Oregon		Tidepool	43.3543	0
OS Fishes:1919	Artedius fenestralis	United States	Oregon	Clatsop County	Tidepool	44.2132	0
UBC 590111	Artedius fenestralis	Canada	BC		Tidepool	48.782	0
UBC 590112	Artedius fenestralis	Canada	BC		Tidepool	48.782	0
UBC 590110	Artedius fenestralis	Canada	BC		Tidepool	48.782	0
UBC 550357	Artedius fenestralis	Canada	BC		Tidepool	49.3017	0
UBC 620854	Artedius fenestralis	Canada	BC		Tidepool	48.4284	0
UBC 620638	Artedius fenestralis	Canada	BC		Tidepool	48.4284	0
UBC 631313	Artedius fenestralis	United States	AK		Tidepool	51.7616	0
UBC 650142	Artedius fenestralis	United States	AK		Tidepool	55.4128	0
UBC 650581	Artedius fenestralis	United States	AK		Tidepool	55.3833	0
UBC 630334	Artedius fenestralis	United States	AK		Tidepool	54.7875	0
UBC 630333	Artedius fenestralis	United States	AK		Tidepool	54.7875	0
UBC 610006	Artedius fenestralis	United States	WA		Tidepool	48.3681	0
UBC 620989	Artedius fenestralis	United States	AK		Intertidal	58.4333	0
UMMZ FISH:92906	Artedius fenestralis	United States	Oregon	Tillamook	Tidepool	45.4562	0
UMMZ FISH:92894	Artedius fenestralis	United States	Washington	Clallam	Tidepool	47.9081	0
UMMZ FISH:92897	Artedius fenestralis	United States	Washington		Tidepool	47.3042	0
UMMZ FISH:92898	Artedius fenestralis	United States	Washington		Tidepool	47.3556	0
UMMZ FISH:92908	Artedius fenestralis	United States	Oregon	Tillamook	Tidepool	45.4562	0
UMMZ FISH:92909	Artedius fenestralis	United States	Oregon	Tillamook	Tidepool	45.4562	0
UMMZ FISH:92910	Artedius fenestralis	United States	Oregon	Tillamook	Tidepool	45.4562	0
UMMZ FISH:92977	Artedius fenestralis	United States	Washington		Tidepool	47.3042	0
UW 151843	Artedius fenestralis	United States	WASHINGTON	SAN JUAN	Tidepool	48.4847	0
UW 1264	Artedius fenestralis	United States	WASHINGTON	SAN JUAN	Tidepool	48.4847	0
UW 642	Artedius fenestralis	United States	WASHINGTON	KITSAP	Tidepool	47.6477	0
UW 1010	Artedius fenestralis	United States	WASHINGTON	SAN JUAN	Tidepool	48.4847	0
UW 155536	Artedius fenestralis	United States	WASHINGTON	SAN JUAN	Tidepool	48.5164	0
UW 1474	Artedius fenestralis	United States	WASHINGTON	SAN JUAN	Tidepool	48.4847	0
UW 1259	Artedius fenestralis	United States	WASHINGTON	SAN JUAN	Tidepool	48.4847	0
UW 22431	Artedius fenestralis	United States	WASHINGTON	CLALLAM	Tidepool	48.2533	0
UW 2680	Artedius fenestralis	United States	ALASKA		Tidepool	59.6704	0
SIO 63-1065	Artedius fenestralis	United States	Alaska			59.5	0.1524
SIO 63-1069	Artedius fenestralis	United States	Alaska			59.5	0.3048
SIO 63-1068	Artedius fenestralis	United States	Alaska			59.5	0.4572
CAS 25152	Artedius fenestralis	United States	California	Humboldt		41.0544	0.4572
CAS 78136	Artedius fenestralis	Canada	British Columbia			50.5667	1
UAM_2950	Artedius fenestralis	United States	AK			57.0904	1
UAM_2957	Artedius fenestralis	United States	AK			57.0488	1
UAM_2961	Artedius fenestralis	United States	AK			57.056	1
UW 44215	Artedius fenestralis	United States	WASHINGTON			47.7695	1
UAM 6252	Artedius fenestralis	United States	AK			57.7918	1
UW 2127	Artedius fenestralis	United States	WASHINGTON	SAN JUAN		48.5394	1.524
CAS 60324	Artedius fenestralis	Canada	British Columbia			48.8333	1.524
CAS 79876	Artedius fenestralis	Canada	British Columbia			48.6833	1.8288
UW 155547	Artedius fenestralis	United States	WASHINGTON	CLALLAM		48.143	2
CAS 43120	Artedius fenestralis	United States	Alaska			59.65	3
UW 151642	Artedius fenestralis	United States	ALASKA			59.47	5
UAM 6167	Artedius fenestralis	United States	AK			59.4681	6
UW 1104	Artedius fenestralis	United States	WASHINGTON	SAN JUAN		48.5626	6.096
UW 829	Artedius fenestralis	United States	WASHINGTON	KING		47.5755	6.096
UW 980	Artedius fenestralis	United States	WASHINGTON	KING		47.5755	6.096
UW 118839	Artedius fenestralis	United States	WASHINGTON			47.5704	7
UW 118840	Artedius fenestralis	United States	WASHINGTON			47.5704	7
UAM 6159	Artedius fenestralis	United States	AK			59.4681	7
CAS 21751	Artedius fenestralis	United States	California	Marin		37.9938	7.62
UW 748	Artedius fenestralis	United States	WASHINGTON	KING		47.5755	9.144
UW 923	Artedius fenestralis	United States	WASHINGTON	KING		47.5755	9.144
CAS 27912	Artedius fenestralis	United States	California	Mendocino		38.9	9.4488
CAS 53631	Artedius fenestralis	United States	Alaska			55.9	10
UW 25331	Artedius fenestralis	United States	ALASKA			59.4469	10
CAS 27702	Artedius fenestralis	United States	California	Mendocino		38.9	12.192
UW 25304	Artedius fenestralis	United States	ALASKA			60.3056	13.716
CAS 28839	Artedius fenestralis	United States	California	Mendocino		38.9	15.24
SIO 97-139	Artedius fenestralis	United States	California				15.24
CAS 40354	Artedius fenestralis	United States	Oregon			46.25	18.288
UW 25321	Artedius fenestralis	United States	WASHINGTON	KING		47.662	18.288
UW 1213	Artedius fenestralis	United States	WASHINGTON	SAN JUAN		48.5394	22.86
UW 153279	Artedius fenestralis	United States	ALASKA			60.1982	23
UW 112762	Artedius fenestralis	United States	WASHINGTON			48.5151	25.6032
CAS 53632	Artedius fenestralis	United States	Alaska			55.15	27
OS Fishes:12040	Artedius fenestralis	United States	Oregon			44.2132	27.3
UW 1493	Artedius fenestralis	United States	WASHINGTON	SAN JUAN		48.6331	27.432
SIO 63-206	Artedius fenestralis	Canada	British Columbia			49.3167	30.48
CAS 30539	Artedius fenestralis	United States	Washington			47.1333	52
UW 118570	Artedius fenestralis	United States	WASHINGTON			47.2721	53.0352
UW 118569	Artedius fenestralis	United States	WASHINGTON			47.2721	53.0352
SIO 63-204	Artedius fenestralis	Canada	British Columbia			49.3333	91.44
SU 4010	Artedius fenestralis	United States	Washington			48.25	168.25
LACM Fish:48372.001	Artedius harringtoni	United States	California	Del Norte	Tidepool	41.7732	0
LACM Fish:31700.005	Artedius harringtoni	United States	California	San Luis Obispo		35.2108	0
LACM Fish:31701.002	Artedius harringtoni	United States	California	San Luis Obispo		35.2108	0
LACM Fish:31936.006	Artedius harringtoni	United States	California	Humboldt		41.341	0
LACM Fish:31977.004	Artedius harringtoni	United States	California	Mendocino		39.4252	0
LACM Fish:32671.005	Artedius harringtoni	United States	California	San Luis Obispo		35.2162	0
LACM Fish:52248.006	Artedius harringtoni	United States	California	Monterey		35.9117	0
LACM Fish:54062.002	Artedius harringtoni	United States	California			34.045
SU 18133	Artedius harringtoni	United States	California	Monterey	Tidepool	36.6222	0
SU 40884	Artedius harringtoni	United States	California		Tidepool	36.5189	0
CAS 28640	Artedius harringtoni	United States	California	Humboldt	Tidepool	40.1389	0
SU 40883	Artedius harringtoni	United States	California	Monterey	Tidepool	36.5186	0
CAS 27304	Artedius harringtoni	United States	California	Sonoma	Tidepool	38.4069	0
CAS 28292	Artedius harringtoni	United States	California	Sonoma	Tidepool	38.5649	0
CAS 31092	Artedius harringtoni	United States	California	Sonoma	Tidepool	38.4069	0
LACM Fish:49200.001	Artedius harringtoni	United States	California	San Luis Obispo	Tidepool	35.6499	0
OS Fishes:6559	Artedius harringtoni	United States	Oregon	Lincoln County	Tidepool	44.6737	0
OS Fishes:7471	Artedius harringtoni	United States	Oregon	Lincoln County	Tidepool	44.6737	0
OS Fishes:7474	Artedius harringtoni	United States	Oregon	Lincoln County	Tidepool	44.6737	0
OS Fishes:8869	Artedius harringtoni	United States	Oregon		Tidepool	44.254	0
OS Fishes:11055	Artedius harringtoni	United States	Oregon		Tidepool	44.254	0
OS Fishes:2022	Artedius harringtoni	United States	Oregon	Lincoln County		44.6737	0
UBC 900120	Artedius harringtoni	Canada	British Columbia		Tidepool	48.8507	0
UBC 900119	Artedius harringtoni	Canada	British Columbia		Tidepool	48.8507	0
UBC 900181	Artedius harringtoni	Canada	British Columbia		Tidepool	48.8507	0
UBC 900061	Artedius harringtoni	Canada	British Columbia		Tidepool	48.8507	0
UBC 900094	Artedius harringtoni	Canada	British Columbia		Tidepool	48.8507	0
UBC 900113	Artedius harringtoni	Canada	British Columbia		Tidepool	48.8507	0
UBC 900084	Artedius harringtoni	Canada	British Columbia		Tidepool	48.8507	0
UBC 900134	Artedius harringtoni	Canada	British Columbia		Tidepool	48.8507	0
UBC 900129	Artedius harringtoni	Canada	British Columbia		Tidepool	48.8507	0
UBC 900127	Artedius harringtoni	Canada	British Columbia		Tidepool	48.8507	0
UBC 900152	Artedius harringtoni	Canada	British Columbia		Tidepool	48.8507	0
UBC 900071	Artedius harringtoni	Canada	British Columbia		Tidepool	48.8507	0
UBC 900177	Artedius harringtoni	Canada	British Columbia		Tidepool	48.8507	0
UBC 900070	Artedius harringtoni	Canada	British Columbia		Tidepool	48.8507	0
UBC 900106	Artedius harringtoni	Canada	British Columbia		Tidepool	48.8507	0
UBC 900114	Artedius harringtoni	Canada	British Columbia		Tidepool	48.8507	0
UBC 900072	Artedius harringtoni	Canada	British Columbia		Tidepool	48.8507	0
UBC 900145	Artedius harringtoni	Canada	British Columbia		Tidepool	48.8507	0
UBC 900117	Artedius harringtoni	Canada	British Columbia		Tidepool	48.8507	0
UBC 900074	Artedius harringtoni	Canada	British Columbia		Tidepool	48.8507	0
UBC 900060	Artedius harringtoni	Canada	British Columbia		Tidepool	48.8507	0
UBC 900049	Artedius harringtoni	Canada	British Columbia		Tidepool	48.8507	0
UBC 900011	Artedius harringtoni	Canada	British Columbia		Tidepool	48.8507	0
UBC 590115	Artedius harringtoni	Canada	British Columbia		Tidepool	48.782	0
UBC 650581	Artedius harringtoni	United States	Alaska		Tidepool	55.3833	0
UBC 650540	Artedius harringtoni	United States	Alaska		Tidepool	58.2114	0
UBC 620989	Artedius harringtoni	United States	Alaska		Tidepool	58.4333	0
UMMZ FISH:63348	Artedius harringtoni	United States	California	Del Norte	Tidepool	41.7558	0
UMMZ FISH:92865	Artedius harringtoni	United States	Washington	Clallam	Tidepool	47.9081	0
UMMZ FISH:92874	Artedius harringtoni	United States	Oregon	Tillamook	Tidepool	45.7676	0
UMMZ FISH:92875	Artedius harringtoni	United States	Oregon	Tillamook	Tidepool	45.7676	0
UMMZ FISH:92876	Artedius harringtoni	United States	Oregon	Tillamook	Tidepool	45.7676	0
UW 112194	Artedius harringtoni	USA	WASHINGTON		Tidepool	48.4847	0
UW 1011	Artedius harringtoni	USA	WASHINGTON	SAN JUAN	Tidepool	48.4847	0
UW 155535	Artedius harringtoni	USA	WASHINGTON	SAN JUAN	Tidepool	48.5164	0
UW 1248	Artedius harringtoni	USA	WASHINGTON	SAN JUAN	Tidepool	48.4847	0
UW 1028	Artedius harringtoni	USA	WASHINGTON	SAN JUAN	Tidepool	48.4847	0
CAS 29257	Artedius harringtoni	United States	California	Humboldt	Tidepool	40.13	0.12192
UW 1265	Artedius harringtoni	USA	WASHINGTON	SAN JUAN	Tidepool	48.4847	0.4572
UMMZ FISH:92870	Artedius harringtoni	United States	Oregon	Clatsop		46.1298	0.6096
UMMZ FISH:92882	Artedius harringtoni	United States	Oregon	Coos		43.3063	0.6096
UW 1059	Artedius harringtoni	USA	WASHINGTON	SAN JUAN	Tidepool	48.4847	0.9144
UW 3020	Artedius harringtoni	USA	WASHINGTON	CLALLAM	Tidepool	47.9667	0.9144
CAS 29488	Artedius harringtoni	United States	California	Mendocino		39.3187	0.9144
CAS 29521	Artedius harringtoni	United States	California	Mendocino		39.6489	0.9144
CAS 25120	Artedius harringtoni	United States	California	Del Norte	Tidepool	41.7856	0.9144
UAM 6253	Artedius harringtoni	United States	Alaska	Kodiak Marina, Kodiak Island, AK		57.7878	1
CAS 29797	Artedius harringtoni	United States	California	Humboldt	Tidepool	40.0211	1.2192
LACM Fish:31937.009	Artedius harringtoni	United States	California	Humboldt		41.0427	1.5
LACM Fish:31937.008	Artedius harringtoni	United States	California	Humboldt		41.0427	1.5
CAS 29327	Artedius harringtoni	United States	California	Mendocino		39.6278	1.6764
UW 2310	Artedius harringtoni	USA	WASHINGTON	CLALLAM	Tidepool	47.9667	1.8288
UW 155860	Artedius harringtoni	USA	WASHINGTON	CLALLAM		48.143	2
SIO 67-151	Artedius harringtoni	United States	California			35.65	3.6576
UAM 6163	Artedius harringtoni	United States	Alaska	Kasitsna Bay		59.4681	5
UAM 6155	Artedius harringtoni	United States	Alaska	Kasitsna Bay		59.4681	5
SIO 52-79	Artedius harringtoni	United States	California			41.05	5.4864
LACM Fish:31301.003	Artedius harringtoni	United States	California	San Luis Obispo		35.2108	6
UW 118837	Artedius harringtoni	USA	WASHINGTON			47.5704	7
UAM 6158	Artedius harringtoni	United States	Alaska	Kasitsna Bay		59.4681	7
CAS 27899	Artedius harringtoni	United States	California	Mendocino		38.9142	8.8392
LACM Fish:6582.007	Artedius harringtoni	United States	California	San Luis Obispo		35.6322	9
LACM Fish:33288.001	Artedius harringtoni	United States	Alaska			55.421	9.1
UW 5888	Artedius harringtoni	USA	WASHINGTON	KITSAP		47.747	9.144
CAS 27905	Artedius harringtoni	United States	California	Mendocino		38.9142	9.144
CAS 27913	Artedius harringtoni	United States	California	Mendocino		38.9147	9.4488
UW 25325	Artedius harringtoni	USA	ALASKA			59.4469	10
SIO 54-191	Artedius harringtoni	United States	California			34.0583	10.668
SIO 72-86	Artedius harringtoni	United States	California			35.65	10.668
LACM Fish:31932.007	Artedius harringtoni	United States	California	Mendocino		40.022	10.7
UW 113230	Artedius harringtoni	USA	WASHINGTON	ISLAND		48.1231	12.192
UW 113231	Artedius harringtoni	USA	WASHINGTON	ISLAND		48.1231	12.192
CAS 27703	Artedius harringtoni	United States	California	Mendocino		38.9156	12.192
CAS 27704	Artedius harringtoni	United States	California	Mendocino		38.9156	12.192
CAS 31330	Artedius harringtoni	United States	California	Mendocino		38.9156	12.192
SIO 06-4	Artedius harringtoni	United States	Washington			47.9983	12.192
CAS 31331	Artedius harringtoni	United States	California	Mendocino		38.9156	12.192
LACM Fish:8222	Artedius harringtoni	United States	California	San Luis Obispo		35.6355	12.2
LACM Fish:52230.002	Artedius harringtoni	United States	California	San Luis Obispo		35.644	13.7
UW 25318	Artedius harringtoni	USA	ALASKA			59.7257	15
CAS 28840	Artedius harringtoni	United States	California	Mendocino		38.9139	15.24
SIO 63-599	Artedius harringtoni	Canada	British Columbia			49.3667	15.24
SIO 97-139	Artedius harringtoni	United States	California			38.9088	15.24
UW 25322	Artedius harringtoni	USA	ALASKA			60.0378	16
UW 47174	Artedius harringtoni	USA	ALASKA			57.6811	18.288
LACM Fish:52757.001	Artedius harringtoni	United States	California			33.9483
LACM Fish:31930.002	Artedius harringtoni	United States	California	Mendocino		39.9783	21.3
UW 1234	Artedius harringtoni	USA	WASHINGTON	SAN JUAN		48.5514	22.86
SIO 69-90	Artedius harringtoni	United States	Alaska			55.35	24.384
UW 1314	Artedius harringtoni	USA	WASHINGTON	SKAGIT		48.5126	26
LACM Fish:52773.003	Artedius harringtoni	United States	California			32.96
UW 1300	Artedius harringtoni	USA	WASHINGTON	SAN JUAN		48.573	45.72
CAS 17769	Artedius lateralis	United States	California	Sonoma	Tidepool	38.4069	0
CAS 17777	Artedius lateralis	United States	California	Marin	Tidepool	37.8911	0
CAS 18883	Artedius lateralis	United States	California	San Mateo	Tidepool	37.5274	0
CAS 18906	Artedius lateralis	United States	California	San Mateo	Tidepool	37.5274	0
CAS 18911	Artedius lateralis	United States	California	San Mateo	Tidepool	37.5274	0
CAS 18926	Artedius lateralis	United States	California	San Mateo	Tidepool	37.5274	0
CAS 18946	Artedius lateralis	United States	California	San Mateo	Tidepool	37.5274	0
CAS 19103	Artedius lateralis	United States	California	Mendocino	Tidepool	38.8012	0
CAS 20072	Artedius lateralis	United States	California	Humboldt	Tidepool	40.0206	0
CAS 216163	Artedius lateralis	United States	California	San Mateo	Tidepool	37.5274	0
CAS 216164	Artedius lateralis	United States	California	San Mateo	Tidepool	37.5274	0
CAS 216170	Artedius lateralis	United States	California	San Mateo	Tidepool	37.5274	0
CAS 216176	Artedius lateralis	United States	California		Tidepool	33.9624	0
CAS 216183	Artedius lateralis	United States	California	Marin	Tidepool	37.8911	0
CAS 216185	Artedius lateralis	United States	California	San Mateo	Tidepool	37.5247	0
CAS 216293	Artedius lateralis	United States	California	San Mateo	Tidepool	37.5274	0
CAS 234832	Artedius lateralis	United States	California	Marin	Tidepool	37.8911	0
CAS 25121	Artedius lateralis	United States	California	Del Norte	Tidepool	41.7856	0
CAS 25133	Artedius lateralis	United States	California	Del Norte	Tidepool	41.7856	0
CAS 25146	Artedius lateralis	United States	California	Humboldt	Tidepool	41.0555	0
CAS 25165	Artedius lateralis	United States	California	Del Norte	Tidepool	41.7856	0
CAS 27305	Artedius lateralis	United States	California	Sonoma	Tidepool	38.4069	0
CAS 27316	Artedius lateralis	United States	California	Marin	Tidepool	37.8908	0
CAS 27340	Artedius lateralis	United States	California	Marin	Tidepool	37.8961	0
CAS 27367	Artedius lateralis	United States	California	Sonoma	Tidepool	38.2614	0
CAS 27386	Artedius lateralis	United States	California	Marin	Tidepool	37.8911	0
CAS 27574	Artedius lateralis	United States	California	Marin	Tidepool	38.2508	0
CAS 27843	Artedius lateralis	United States	California	Mendocino	Tidepool	39.3186	0
CAS 28141	Artedius lateralis	United States	California	Mendocino	Tidepool	39.13	0
CAS 28216	Artedius lateralis	United States	California	Mendocino	Tidepool	39.3145	0
CAS 28294	Artedius lateralis	United States	California	Sonoma	Tidepool	38.5649	0
CAS 28608	Artedius lateralis	United States	California	Mendocino	Tidepool	38.7781	0
CAS 28624	Artedius lateralis	United States	California	Humboldt	Tidepool	40.13	0
CAS 28641	Artedius lateralis	United States	California	Humboldt	Tidepool	40.1389	0
CAS 28822	Artedius lateralis	United States	California	Mendocino	Tidepool	38.9167	0
CAS 29258	Artedius lateralis	United States	California	Humboldt	Tidepool	40.13	0
CAS 29782	Artedius lateralis	United States	California	Humboldt	Tidepool	40.0211	0
CAS 29796	Artedius lateralis	United States	California	Humboldt	Tidepool	40.0211	0
CAS 29834	Artedius lateralis	United States	California	Sonoma	Tidepool	38.5964	0
CAS 31394	Artedius lateralis	United States	California	San Mateo	Tidepool	37.5274	0
CAS 32987	Artedius lateralis	United States	California	San Luis Obispo	Tidepool	35.6508	0
CAS 48213	Artedius lateralis	United States	California	San Luis Obispo	Tidepool	35.5584	0
CAS 80844	Artedius lateralis	United States	California	San Luis Obispo	Tidepool	35.6508	0
CAS 91840	Artedius lateralis	United States	California	San Mateo	Tidepool	37.5274	0
LACM Fish:51789.002	Artedius lateralis	United States	California	San Luis Obispo	Tidepool	35.636	0
LACM Fish:52232.001	Artedius lateralis	United States	California	San Luis Obispo	Tidepool	35.6489	0
LACM Fish:4381	Artedius lateralis	United States	California	San Mateo	Tidepool	37.5114	0
LACM Fish:30788.001	Artedius lateralis	United States	California	Monterey	Tidepool	36.4488	0
LACM Fish:30788.002	Artedius lateralis	United States	California	Monterey	Tidepool	36.4488	0
LACM Fish:31827.002	Artedius lateralis	United States	California		Tidepool	38.9088	0
LACM Fish:33708.002	Artedius lateralis	United States	California		Tidepool	38.9381	0
LACM Fish:35800.001	Artedius lateralis	United States	California	Los Angeles	Tidepool	33.7583	0
LACM Fish:39974.001	Artedius lateralis	United States	California	San Luis Obispo	Tidepool	35.6502	0
LACM Fish:52278.003	Artedius lateralis	United States	California	San Luis Obispo	Tidepool	35.6522	0
LACM Fish:8623	Artedius lateralis	United States	California	Los Angeles		33.7042	0
LACM Fish:9950.016	Artedius lateralis	United States	California	San Luis Obispo		35.636	0
LACM Fish:9950.031	Artedius lateralis	United States	California	San Luis Obispo		35.636	0
LACM Fish:31698.005	Artedius lateralis	United States	California	San Luis Obispo		35.2108	0
LACM Fish:31699.004	Artedius lateralis	United States	California	San Luis Obispo		35.2118	0
LACM Fish:31700.006	Artedius lateralis	United States	California	San Luis Obispo		35.2108	0
LACM Fish:31860.002	Artedius lateralis	United States	California	San Luis Obispo		35.2162	0
LACM Fish:31977.005	Artedius lateralis	United States	California	Mendocino		39.4252	0
LACM Fish:32671.042	Artedius lateralis	United States	California	San Luis Obispo		35.2162	0
LACM Fish:33384.003	Artedius lateralis	United States	California	Mendocino		38.9271	0
LACM Fish:47749.001	Artedius lateralis	United States	California	Santa Barbara		34.5542	0
LACM Fish:47921.001	Artedius lateralis	United States	California	San Luis Obispo		35.654	0
LACM Fish:49896.001	Artedius lateralis	United States	California	San Luis Obispo		35.6356	0
LACM Fish:52219.003	Artedius lateralis	United States	California	San Luis Obispo		35.6511	0
LACM Fish:52220.001	Artedius lateralis	United States	California	San Luis Obispo		35.6509	0
LACM Fish:52244.006	Artedius lateralis	United States	California	San Luis Obispo		35.6505	0
LACM Fish:52248.007	Artedius lateralis	United States	California	Monterey		35.9117	0
LACM Fish:54390.001	Artedius lateralis	United States	California			33.3083	0
OS Fishes:2118	Artedius lateralis	United States	Oregon	Curry County	Tidepool	42.0526	0
OS Fishes:273	Artedius lateralis	United States	Oregon	Coos County	Tidepool	43.3063	0
OS Fishes:281	Artedius lateralis	United States	Oregon	Lincoln County	Tidepool	44.6737	0
OS Fishes:3178	Artedius lateralis	United States	Oregon	Curry County	Tidepool	42.0526	0
OS Fishes:428	Artedius lateralis	United States	Oregon	Lincoln County	Tidepool	44.6737	0
OS Fishes:430	Artedius lateralis	United States	Oregon	Lincoln County	Tidepool	44.6737	0
OS Fishes:6530	Artedius lateralis	United States	Oregon		Tidepool	43.3543	0
OS Fishes:6534	Artedius lateralis	United States	Oregon	Lincoln County	Tidepool	44.6737	0
OS Fishes:6595	Artedius lateralis	United States	Oregon	Lincoln County	Tidepool	44.6737	0
OS Fishes:8861	Artedius lateralis	United States	Oregon	Lincoln County	Tidepool	44.8284	0
OS Fishes:8863	Artedius lateralis	United States	Oregon		Tidepool	43.961	0
OS Fishes:8876	Artedius lateralis	United States	Oregon	Lincoln County	Tidepool	44.8284	0
OS Fishes:9138	Artedius lateralis	United States	Oregon		Tidepool	42.2203	0
SIO 00-42	Artedius lateralis	United States	California		Tidepool	38.9117	0
SIO 06-42	Artedius lateralis	United States	California		Tidepool	35.5641	0
SIO 45-215C	Artedius lateralis	Mexico	Baja California		Tidepool	31.54	0
SIO 45-217A	Artedius lateralis	Mexico	Baja California		Tidepool	31.53	0
SIO 45-219A	Artedius lateralis	Mexico	Baja California		Tidepool	31.545	0
SIO 45-55	Artedius lateralis	United States	California		Tidepool	36.4467	0
SIO 46-57B	Artedius lateralis	Mexico	Baja California		Tidepool	31.3333	0
SIO 47-201A	Artedius lateralis	Mexico	Baja California		Tidepool	31.55	0
SIO 47-201B	Artedius lateralis	Mexico	Baja California		Tidepool	31.55	0
SIO 47-201C	Artedius lateralis	Mexico	Baja California		Tidepool	31.55	0
SIO 47-204	Artedius lateralis	Mexico	Baja California		Tidepool	31.55	0
SIO 47-205A	Artedius lateralis	Mexico	Baja California		Tidepool	31.55	0
SIO 47-205B	Artedius lateralis	Mexico	Baja California		Tidepool	31.55	0
SIO 47-77	Artedius lateralis	United States	California		Tidepool	34.0567	0
SIO 47-88	Artedius lateralis	United States	California		Tidepool	34.06	0
SIO 47-89	Artedius lateralis	United States	California		Tidepool	34.06	0
SIO 47-90	Artedius lateralis	United States	California		Tidepool	34.06	0
SIO 49-174A	Artedius lateralis	Mexico	Baja California		Tidepool	31.4667	0
SIO 49-174B	Artedius lateralis	Mexico	Baja California		Tidepool	31.4667	0
SIO 49-175	Artedius lateralis	Mexico	Baja California		Tidepool	31.475	0
SIO 50-282	Artedius lateralis	Mexico	Baja California		Tidepool	31.4667	0
SIO 73-219	Artedius lateralis	United States	California		Tidepool	35.6667	0
SU 16663	Artedius lateralis	United States	California	Del Norte	Tidepool	41.7757	0
SU 16677	Artedius lateralis	United States	California	Del Norte	Tidepool	41.7757	0
SU 24647	Artedius lateralis	United States	California	San Mateo	Tidepool	37.5274	0
SU 24677	Artedius lateralis	United States	California	Monterey	Tidepool	36.6295	0
SU 35370	Artedius lateralis	United States	California	Monterey	Tidepool	36.6222	0
SU 35371	Artedius lateralis	United States	California	Monterey	Tidepool	36.5658	0
SU 35372	Artedius lateralis	United States	California	Monterey	Tidepool	36.5194	0
SU 35374	Artedius lateralis	United States	California	Monterey	Tidepool	36.5175	0
SU 35376	Artedius lateralis	United States	California	San Luis Obispo	Tidepool	35.1578	0
SU 40887	Artedius lateralis	United States	California	Marin	Tidepool	37.8911	0
SU 47516	Artedius lateralis	United States	California	San Mateo	Tidepool	37.5042	0
SU 48856	Artedius lateralis	United States	California	San Luis Obispo	Tidepool	35.5444	0
SU 48893	Artedius lateralis	United States	California	San Luis Obispo	Tidepool	35.5792	0
SU 48924	Artedius lateralis	United States	California	San Luis Obispo	Tidepool	35.7361	0
SU 49202	Artedius lateralis	United States	California	Monterey	Tidepool	36.6295	0
SU 60458	Artedius lateralis	United States	California	San Mateo	Tidepool	37.2415	0
UAM_2943	Artedius lateralis	United States	Alaska	Sitka, Japonski Island	Tidepool	57.056	0
UAM_2951	Artedius lateralis	United States	Alaska	Sitka, Halibut Point Rd.	Tidepool	57.0904	0
UAM_2962	Artedius lateralis	United States	Alaska	Sitka, Japonski Island	Tidepool	57.056	0
UAM_2970	Artedius lateralis	United States	Washington	Sekiu	Tidepool	48.268	0
UAM_2976	Artedius lateralis	United States	Oregon	Newport, Boiler Bay	Tidepool	44.8299	0
UAM_4688	Artedius lateralis	Canada	British Columbia	Ucluelet, Wya Point	Tidepool	48.962	0
UBC 600548	Artedius lateralis	Canada	British Columbia		Tidepool	49.3017	0
UBC 630333	Artedius lateralis	United States	Alaska		Tidepool	54.7875	0
UBC 630809	Artedius lateralis	United States	Washington		Tidepool	48.3681	0
UBC 650581	Artedius lateralis	United States	Alaska		Tidepool	55.3833	0
UBC 900008	Artedius lateralis	Canada	British Columbia		Tidepool	48.8507	0
UBC 900011	Artedius lateralis	Canada	British Columbia		Tidepool	48.8507	0
UBC 900024	Artedius lateralis	Canada	British Columbia		Tidepool	48.8507	0
UBC 900027	Artedius lateralis	Canada	British Columbia		Tidepool	48.8507	0
UBC 900031	Artedius lateralis	Canada	British Columbia		Tidepool	48.8507	0
UBC 900046	Artedius lateralis	Canada	British Columbia		Tidepool	48.8507	0
UBC 900049	Artedius lateralis	Canada	British Columbia		Tidepool	48.8507	0
UBC 900060	Artedius lateralis	Canada	British Columbia		Tidepool	48.8507	0
UBC 900063	Artedius lateralis	Canada	British Columbia		Tidepool	48.8507	0
UBC 900070	Artedius lateralis	Canada	British Columbia		Tidepool	48.8507	0
UBC 900072	Artedius lateralis	Canada	British Columbia		Tidepool	48.8507	0
UBC 900074	Artedius lateralis	Canada	British Columbia		Tidepool	48.8507	0
UBC 900081	Artedius lateralis	Canada	British Columbia		Tidepool	48.8507	0
UBC 900083	Artedius lateralis	Canada	British Columbia		Tidepool	48.8507	0
UBC 900086	Artedius lateralis	Canada	British Columbia		Tidepool	48.8507	0
UBC 900088	Artedius lateralis	Canada	British Columbia		Tidepool	48.8507	0
UBC 900094	Artedius lateralis	Canada	British Columbia		Tidepool	48.8507	0
UBC 900104	Artedius lateralis	Canada	British Columbia		Tidepool	48.8507	0
UBC 900106	Artedius lateralis	Canada	British Columbia		Tidepool	48.8507	0
UBC 900107	Artedius lateralis	Canada	British Columbia		Tidepool	48.8507	0
UBC 900109	Artedius lateralis	Canada	British Columbia		Tidepool	48.8507	0
UBC 900111	Artedius lateralis	Canada	British Columbia		Tidepool	48.8507	0
UBC 900113	Artedius lateralis	Canada	British Columbia		Tidepool	48.8507	0
UBC 900114	Artedius lateralis	Canada	British Columbia		Tidepool	48.8507	0
UBC 900117	Artedius lateralis	Canada	British Columbia		Tidepool	48.8507	0
UBC 900119	Artedius lateralis	Canada	British Columbia		Tidepool	48.8507	0
UBC 900120	Artedius lateralis	Canada	British Columbia		Tidepool	48.8507	0
UBC 900127	Artedius lateralis	Canada	British Columbia		Tidepool	48.8507	0
UBC 900128	Artedius lateralis	Canada	British Columbia		Tidepool	48.8507	0
UBC 900129	Artedius lateralis	Canada	British Columbia		Tidepool	48.8507	0
UBC 900134	Artedius lateralis	Canada	British Columbia		Tidepool	48.8507	0
UBC 900152	Artedius lateralis	Canada	British Columbia		Tidepool	48.8507	0
UBC 900167	Artedius lateralis	Canada	British Columbia		Tidepool	48.8507	0
UBC 900171	Artedius lateralis	Canada	British Columbia		Tidepool	48.8507	0
UBC 900176	Artedius lateralis	Canada	British Columbia		Tidepool	48.8507	0
UBC 900177	Artedius lateralis	Canada	British Columbia		Tidepool	48.8507	0
UBC 900179	Artedius lateralis	Canada	British Columbia		Tidepool	48.8507	0
UBC 900180	Artedius lateralis	Canada	British Columbia		Tidepool	48.8507	0
UBC 900181	Artedius lateralis	Canada	British Columbia		Tidepool	48.8507	0
UBC 900188	Artedius lateralis	Canada	British Columbia		Tidepool	48.8507	0
UMMZ FISH:126490	Artedius lateralis (as A. delacyi)	United States	Alaska		Tidepool	57.54	0
UMMZ FISH:126491	Artedius lateralis (as A. delacyi)	United States	Alaska		Tidepool	57.54	0
UMMZ FISH:141177	Artedius lateralis	United States	California	San Luis Obispo	Tidepool	35.2828	0
UMMZ FISH:142395	Artedius lateralis	United States	California	Monterey	Tidepool	37.2167	0
UMMZ FISH:61652	Artedius lateralis	United States	California	San Luis Obispo	Tidepool	35.2828	0
UMMZ FISH:61660	Artedius lateralis	United States	California	San Luis Obispo	Tidepool	35.2828	0
UMMZ FISH:61663	Artedius lateralis	United States	California	San Luis Obispo	Tidepool	35.2828	0
UMMZ FISH:61664	Artedius lateralis	United States	California	San Luis Obispo	Tidepool	35.2828	0
UMMZ FISH:63453	Artedius lateralis	United States	California	Del Norte	Tidepool	41.7076	0
UMMZ FISH:63458	Artedius lateralis	United States	California	Del Norte	Tidepool	41.7076	0
UMMZ FISH:63476	Artedius lateralis	United States	California	Del Norte	Tidepool	41.7076	0
UMMZ FISH:63477	Artedius lateralis	United States	California	Marin	Tidepool	38.0834	0
UMMZ FISH:63481	Artedius lateralis	United States	California	Monterey	Tidepool	36.6002	0
UMMZ FISH:92931	Artedius lateralis	United States	Washington	Clallam	Tidepool	48.0405	0
UMMZ FISH:92933	Artedius lateralis	United States	Washington	Clallam	Tidepool	48.0405	0
UMMZ FISH:92937	Artedius lateralis	United States	Washington	Clallam	Tidepool	48.0405	0
UMMZ FISH:92938	Artedius lateralis	United States	Washington	Clallam	Tidepool	48.0405	0
UMMZ FISH:92939	Artedius lateralis	United States	Washington	Clallam	Tidepool	48.0405	0
UMMZ FISH:92948	Artedius lateralis	United States	Washington		Tidepool	47.3042	0
UMMZ FISH:92955	Artedius lateralis	United States	Oregon	Tillamook	Tidepool	45.7676	0
UMMZ FISH:92956	Artedius lateralis	United States	Oregon	Tillamook	Tidepool	45.7676	0
UMMZ FISH:92957	Artedius lateralis	United States	Oregon	Tillamook	Tidepool	45.7676	0
UW 1012	Artedius lateralis	USA	WASHINGTON	SAN JUAN	Tidepool	48.4847	0
UW 1025	Artedius lateralis	USA	WASHINGTON	SAN JUAN	Tidepool	48.4847	0
UW 1058	Artedius lateralis	USA	WASHINGTON	SAN JUAN	Tidepool	48.4847	0
UW 1140	Artedius lateralis	USA	WASHINGTON	SAN JUAN	Tidepool	48.4847	0
UW 1261	Artedius lateralis	USA	WASHINGTON	SAN JUAN	Tidepool	48.4847	0
UW 1457	Artedius lateralis	USA	WASHINGTON	CLALLAM	Tidepool	47.9667	0
UW 1481	Artedius lateralis	USA	WASHINGTON	SAN JUAN	Tidepool	48.4847	0
UW 152991	Artedius lateralis	USA	WASHINGTON		Tidepool	48.4847	0
UW 22432	Artedius lateralis	USA	WASHINGTON	CLALLAM	Tidepool	48.2628	0
UW 2312	Artedius lateralis	USA	WASHINGTON	CLALLAM	Tidepool	47.9667	0
UW 2683	Artedius lateralis	USA	ALASKA		Tidepool	59.6704	0
UW 3019	Artedius lateralis	USA	WASHINGTON	CLALLAM	Tidepool	47.9667	0
UW 903	Artedius lateralis	USA	OREGON	COOS	Tidepool	43.3063	0
SIO 72-91	Artedius lateralis	United States	California			35.65	0.0762
SIO 46-4A	Artedius lateralis	Mexico	Baja California			30.93	0.1524
SIO 69-250	Artedius lateralis	United States	California			35.65	0.1524
SIO 73-217	Artedius lateralis	United States	California			35.6667	0.1524
SIO 80-18	Artedius lateralis	United States	California			35.65	0.1524
SIO 47-77A	Artedius lateralis	United States	California			34.055	0.254
SIO 69-249	Artedius lateralis	United States	California			35.65	0.3048
SIO 73-221	Artedius lateralis	United States	California			35.6667	0.3048
SIO 80-21	Artedius lateralis	United States	California			35.6667	0.3048
CAS 25056	Artedius lateralis	United States	California	Humboldt		41.0561	0.3048
CAS 29819	Artedius lateralis	United States	California	Sonoma		38.505	0.3048
SIO 46-4C	Artedius lateralis	Mexico	Baja California			30.93	0.3048
SIO 72-90	Artedius lateralis	United States	California			35.65	0.3048
SIO 49-173A	Artedius lateralis	Mexico	Baja California			31.55	0.4572
CAS 25067	Artedius lateralis	United States	California	Del Norte		41.9901	0.57912
CAS 25079	Artedius lateralis	United States	California	Del Norte		41.9517	0.6096
CAS 25088	Artedius lateralis	United States	California	Del Norte		41.7702	0.6096
CAS 25102	Artedius lateralis	United States	California	Del Norte		41.7711	0.6096
SIO 48-315	Artedius lateralis	Mexico	Baja California			32.2633	0.6096
SIO 52-16	Artedius lateralis	Mexico	Baja California			31.55	0.6096
UMMZ FISH:92950	Artedius lateralis	United States	Oregon	Clatsop		46.1298	0.6096
UMMZ FISH:92972	Artedius lateralis	United States	Oregon	Coos		43.3063	0.6096
CAS 25181	Artedius lateralis	United States	California	Humboldt		41.0569	0.762
SIO 45-203	Artedius lateralis	Mexico	Baja California			32.2767	0.762
SIO 46-4B	Artedius lateralis	Mexico	Baja California			30.93	0.762
SIO 69-245	Artedius lateralis	United States	California			35.65	0.762
CAS 29489	Artedius lateralis	United States	California	Mendocino		39.3186	0.9144
CAS 29522	Artedius lateralis	United States	California	Mendocino		39.6578	0.9144
CAS 29678	Artedius lateralis	United States	California	Humboldt		40.0225	0.9144
CAS 29690	Artedius lateralis	United States	California	Humboldt		40.0211	0.9144
SIO 45-20	Artedius lateralis	Mexico	Baja California			32.2617	0.9144
SIO 45-201A	Artedius lateralis	Mexico	Baja California			32.2633	0.9144
SIO 45-219B	Artedius lateralis	Mexico	Baja California			31.545	0.9144
SIO 47-203	Artedius lateralis	Mexico	Baja California			31.55	0.9144
SIO 49-68	Artedius lateralis	Mexico	Baja California			30.9167	0.9144
SIO 51-23	Artedius lateralis	Mexico	Baja California			31.715	0.9144
SIO 61-12	Artedius lateralis	United States	California			37.5667	0.9144
SIO 72-89	Artedius lateralis	United States	California			35.65	0.9144
SIO 73-220	Artedius lateralis	United States	California			35.6667	0.9144
SIO 80-19	Artedius lateralis	United States	California			35.65	0.9144
SU 49546	Artedius lateralis	United States	California	San Mateo		37.5274	0.9144
OS Fishes:2026	Artedius lateralis	United States	Oregon	Lincoln County		44.6737	1
OS Fishes:3171	Artedius lateralis	United States	Oregon	Lincoln County		44.6737	1
UAM 6254	Artedius lateralis	United States	Alaska	Woody Island Channel, Kodiak Island, AK		57.7918	1
SIO 48-308	Artedius lateralis	Mexico	Baja California			32.06	1.0668
SIO 49-173B	Artedius lateralis	Mexico	Baja California			31.55	1.0668
SIO 73-216	Artedius lateralis	United States	California			35.6667	1.0668
SIO 46-58	Artedius lateralis	Mexico	Baja California			31.255	1.2192
SIO 50-278	Artedius lateralis	Mexico	Baja California			30.95	1.2192
SU 48908	Artedius lateralis	United States	California	San Luis Obispo		35.6625	1.2192
LACM Fish:31937.01	Artedius lateralis	United States	California	Humboldt		41.0427	1.5
SIO 50-279	Artedius lateralis	Mexico	Baja California			30.4333	1.524
SIO 61-410	Artedius lateralis	Mexico	Baja California			30.925	1.524
CAS 29328	Artedius lateralis	United States	California	Mendocino		39.6278	1.6764
SIO 67-298	Artedius lateralis	United States	California			35.6667	2.7432
SIO 51-21	Artedius lateralis	Mexico	Baja California			31.7167	3.048
SIO 67-151	Artedius lateralis	United States	California			35.65	3.6576
SIO 51-234	Artedius lateralis	United States	California			33.4483	4.572
SIO 54-188	Artedius lateralis	United States	California			34.0167	4.572
LACM Fish:31301.004	Artedius lateralis	United States	California	San Luis Obispo		35.2108	6
SIO 51-259	Artedius lateralis	United States	California			34.0567	6.096
LACM Fish:33297.001	Artedius lateralis	United States	Alaska			55.4072	6.1
UW 118838	Artedius lateralis	USA	WASHINGTON			47.5704	7
LACM Fish:6582.008	Artedius lateralis	United States	California	San Luis Obispo		35.6322	9
SIO 52-168	Artedius lateralis	Mexico	Baja California			28.8667	9.144
SIO 55-73A	Artedius lateralis	United States	California			32.9	9.144
SIO 63-594	Artedius lateralis	Canada	British Columbia			49.3667	9.144
SIO 69-91	Artedius lateralis	United States	Alaska			55.35	9.144
UW 921	Artedius lateralis	USA	WASHINGTON	KING		47.5755	9.144
SIO 54-191	Artedius lateralis	United States	California			34.0583	10.668
CAS 27705	Artedius lateralis	United States	California	Mendocino		38.9156	12.192
LACM Fish:7467	Artedius lateralis	United States	California	San Luis Obispo		35.6355	12.2
LACM Fish:7469	Artedius lateralis	United States	California	San Luis Obispo		35.6439	15.2
SIO 63-596	Artedius lateralis	Canada	British Columbia			49.3667	15.24
SIO 03-165	Artedius lateralis	United States	California			32.8328	18.288
SIO 47-96	Artedius lateralis	United States	California			34.0117	33.8328
SIO 63-1056	Artedius notospilotus	Mexico	Baja California		Tidepool	30.3717	0
SIO 63-1054	Artedius notospilotus	Mexico	Baja California		Tidepool	30.375	0
LACM Fish:49614.002	Artedius notospilotus	United States	California	Los Angeles	Tidepool	33.7347	0
LACM Fish:9393.004	Artedius notospilotus	United States	California	San Luis Obispo		35.3553	0
LACM Fish:31698.006	Artedius notospilotus	United States	California	San Luis Obispo		35.2108	0
LACM Fish:31701.003	Artedius notospilotus	United States	California	San Luis Obispo		35.2108	0
LACM Fish:31859.003	Artedius notospilotus	United States	California	San Luis Obispo		35.2162	0
LACM Fish:48306.001	Artedius notospilotus	United States	California	Los Angeles		33.753	0
LACM Fish:52281.001	Artedius notospilotus	United States	California	Los Angeles		33.753	0
CAS 11358	Artedius notospilotus	United States	California		Tidepool	32.8124	0
CAS 27317	Artedius notospilotus	United States	California	Marin	Tidepool	37.8908	0
CAS 50402	Artedius notospilotus	United States	California	Marin	Tidepool	37.8945	0
CAS 60702	Artedius notospilotus	United States	California	Marin	Tidepool	37.8911	0
SIO 52-229	Artedius notospilotus	Mexico	Baja California		Tidepool	29.7667	0
SIO 46-4C	Artedius notospilotus	Mexico	Baja California			30.93	0.3048
SIO 44-17	Artedius notospilotus	United States	California			32.8117	0.6096
SIO 61-403	Artedius notospilotus	Mexico	Baja California			30.2833	0.6096
SIO 61-404	Artedius notospilotus	Mexico	Baja California			30.255	0.9144
SIO 50-278	Artedius notospilotus	Mexico	Baja California			30.95	1.2192
SIO 63-1052	Artedius notospilotus	Mexico	Baja California			30.43	1.2192
UMMZ FISH:63362	Artedius notospilotus	USA	California	San Francisco		37.7749	2.4384
CAS 213534	Artedius notospilotus	United States	California	Marin		37.8264	3.048
CAS 13469	Artedius notospilotus	United States	California			37.8124	3.6576
CAS 213536	Artedius notospilotus	United States	California	San Francisco		37.8089	3.6576
LACM Fish:6593.007	Artedius notospilotus	United States	California	San Luis Obispo		35.6418	4
SIO 55-34	Artedius notospilotus	United States	California			35.1	4.572
CAS 213532	Artedius notospilotus	United States	California			37.8908	6.096
CAS 12500	Artedius notospilotus	United States	California			37.8095	6.4008
CAS 215044	Artedius notospilotus	United States	California	San Mateo		37.6614	7.2
CAS 13075	Artedius notospilotus	United States	California			37.7587	7.3152
SIO 52-164	Artedius notospilotus	Mexico	Baja California			28.75	7.62
CAS 42546	Artedius notospilotus	United States	California			37.925	9
LACM Fish:6582.01	Artedius notospilotus	United States	California	San Luis Obispo		35.6322	9
LACM Fish:6582.004	Artedius notospilotus	United States	California	San Luis Obispo		35.6322	9
LACM Fish:30955.001	Artedius notospilotus	United States	California			38.305	9
LACM Fish:51969.002	Artedius notospilotus	United States	California	San Luis Obispo		35.633	9.1
SIO 52-214	Artedius notospilotus	Mexico	Baja California			29.6	9.144
SIO 52-168	Artedius notospilotus	Mexico	Baja California			28.8667	9.144
SIO 52-209	Artedius notospilotus	Mexico	Baja California			29.6	9.144
CAS 42545	Artedius notospilotus	United States	California			37.725	10
SIO 72-368	Artedius notospilotus	United States	California			33.85	10.668
LACM Fish:30949.001	Artedius notospilotus	United States	California			37.805	11
CAS 34822	Artedius notospilotus	United States	California	San Francisco		37.75	12.192
CAS 47383	Artedius notospilotus	United States	California	Santa Barbara		34.4475	12.192
SIO 50-192	Artedius notospilotus	United States	California			35.3333	12.192
SIO 55-105	Artedius notospilotus	United States	California			35.1	15.24
CAS 42732	Artedius notospilotus	United States	California			37.7	17.0688
CAS 12967	Artedius notospilotus	United States	California			37.925	17.3736
CAS 42604	Artedius notospilotus	United States	California			37.6667	19.5072
CAS 42605	Artedius notospilotus	United States	California			37.6667	19.5072
CAS 42640	Artedius notospilotus	United States	California			37.6667	19.5072
CAS 215055	Artedius notospilotus	United States	California			37.7564	20
CAS 42544	Artedius notospilotus	United States	California			37.7917	22
CAS 12886	Chitonotus pugetensis	United States	California			37.8102	5.4864
CAS 12913	Chitonotus pugetensis	United States	California			37.8102	5.4864
UW 822	Chitonotus pugetensis	USA	WASHINGTON	KING		37.9178	6.096
SIO 59-381	Chitonotus pugetensis	United States	California			32.8667	7
SIO 03-154	Chitonotus pugetensis	United States	California			32.7157	7.5
MCZ Ich:61743	Chitonotus pugetensis					44.9681	7.62
SIO 02-26	Chitonotus pugetensis	United States	California			32.8667	8
UW 22155	Chitonotus pugetensis	USA	WASHINGTON	KITSAP		48.1579	10
SIO 84-39	Chitonotus pugetensis	United States	California			33.85	10.3632
UW 5962	Chitonotus pugetensis	USA	WASHINGTON	KITSAP		47.9901	10.9728
UW 25379	Chitonotus pugetensis	USA	WASHINGTON			47.9901	10.9728
CAS 12503	Chitonotus pugetensis	United States	California			37.8322	12.8016
SIO 52-102	Chitonotus pugetensis	Mexico	Baja California			32.4083	14.6304
UW 25390	Chitonotus pugetensis	USA	WASHINGTON	KING		47.662	15
MCZ Ich:61647	Chitonotus pugetensis					48.6331	15.24
MCZ Ich:61646	Chitonotus pugetensis					48.6331	15.24
MCZ Ich:61648	Chitonotus pugetensis					48.6331	15.24
SIO 49-37	Chitonotus pugetensis	Mexico	Baja California			32.4083	15.5448
SIO 48-215	Chitonotus pugetensis	Mexico	Baja California			32.4117	18.288
SIO 48-216	Chitonotus pugetensis	Mexico	Baja California			32.4083	18.288
MCZ Ich:61727	Chitonotus pugetensis					48.6331	18.288
MCZ Ich:61760	Chitonotus pugetensis					48.6331	18.288
MCZ Ich:61761	Chitonotus pugetensis					48.6331	18.288
UW 3557	Chitonotus pugetensis	USA	WASHINGTON	SAN JUAN		47.7159	20
CAS 216332	Chitonotus pugetensis	United States	California	Marin		38.0834	20.1168
SIO 59-20	Chitonotus pugetensis	United States	California			32.5383	21.9456
SIO 49-151	Chitonotus pugetensis	Mexico	Baja California			32.5	21.9456
SIO 49-35	Chitonotus pugetensis	Mexico	Baja California			32.425	22.86
SIO 75-571	Chitonotus pugetensis	United States	California			32.5433	22.86
SIO 54-32	Chitonotus pugetensis	United States	California			33.9667	23.7744
UW 40681	Chitonotus pugetensis	USA	WASHINGTON			47.6144	25
UW 154241	Chitonotus pugetensis	USA	WASHINGTON			47.9951	25
SIO 46-122	Chitonotus pugetensis	Mexico	Baja California			32.425	26.5176
SIO 48-306	Chitonotus pugetensis	Mexico	Baja California			32.405	26.5176
UW 2226	Chitonotus pugetensis	USA	WASHINGTON	SAN JUAN		47.8092	27.432
UW 110750	Chitonotus pugetensis	USA	WASHINGTON	JEFFERSON		47.694	27.432
UW 25388	Chitonotus pugetensis	USA	WASHINGTON	KING		47.6062	27.432
SIO 46-125	Chitonotus pugetensis	Mexico	Baja California			32.4017	27.432
SIO 49-167B	Chitonotus pugetensis	Mexico	Baja California			32.4133	27.432
SIO 51-32	Chitonotus pugetensis	Mexico	Baja California			31.8	27.432
SIO 49-167C	Chitonotus pugetensis	Mexico	Baja California			32.4	27.432
MCZ Ich:61790	Chitonotus pugetensis					48.6331	27.432
MCZ Ich:61762	Chitonotus pugetensis					48.6331	27.432
SIO 48-222	Chitonotus pugetensis	Mexico	Baja California			32.4183	28.3464
SIO 51-260	Chitonotus pugetensis	United States	California			33.9233	28.6512
UW 151078	Chitonotus pugetensis	USA	WASHINGTON			47.662	29.2608
UW 151079	Chitonotus pugetensis	USA	WASHINGTON			47.662	29.2608
SIO 61-524	Chitonotus pugetensis	United States	California			32.85	30.48
UW 25378	Chitonotus pugetensis	USA	WASHINGTON	KING		47.7116	31.0896
UW 117884	Chitonotus pugetensis	USA	WASHINGTON			47.6897	32.9184
UW 25393	Chitonotus pugetensis	USA	WASHINGTON	KITSAP		47.6678	34.7472
SIO 51-27	Chitonotus pugetensis	Mexico	Baja California			31.8	34.7472
UW 48609	Chitonotus pugetensis	USA	WASHINGTON	KING		47.7003	35
UW 17069	Chitonotus pugetensis	USA	WASHINGTON			48.117	36.576
UW 112207	Chitonotus pugetensis	USA	WASHINGTON	KITSAP		47.7333	36.576
UW 112210	Chitonotus pugetensis	USA	WASHINGTON	KITSAP		47.5404	36.576
UW 112212	Chitonotus pugetensis	USA	WASHINGTON	KITSAP		47.6678	36.576
UW 112216	Chitonotus pugetensis	USA	WASHINGTON	KITSAP		47.6678	36.576
UW 112220	Chitonotus pugetensis	USA	WASHINGTON	KITSAP		47.6678	36.576
UW 112226	Chitonotus pugetensis	USA	WASHINGTON	KITSAP		47.6678	36.576
UW 21738	Chitonotus pugetensis	USA	WASHINGTON	SAN JUAN		47.6678	36.576
UW 20606	Chitonotus pugetensis	USA	WASHINGTON			47.6249	36.576
UW 25601	Chitonotus pugetensis	USA	WASHINGTON	KITSAP		47.5755	36.576
SIO 47-186B	Chitonotus pugetensis	United States	California			32.8333	36.576
SIO 51-240	Chitonotus pugetensis	United States	California			34.04	36.576
SIO 49-40	Chitonotus pugetensis	Mexico	Baja California			32.5	36.576
SIO 54-222	Chitonotus pugetensis	Mexico	Baja California			29.1717	36.576
SIO 63-1041	Chitonotus pugetensis	United States	California			34.5833	36.576
SIO 52-7	Chitonotus pugetensis	United States	California			32.55	36.576
SIO 52-8	Chitonotus pugetensis	Mexico	Baja California			32.5167	36.576
SIO 50-230	Chitonotus pugetensis	United States	California			32.875	36.576
SU 3696	Chitonotus pugetensis	United States	California			37.7833	38.4048
UW 25395	Chitonotus pugetensis	USA	WASHINGTON	KING		48.6331	38.4048
UW 25611	Chitonotus pugetensis	USA	WASHINGTON	KING		48.4869	38.4048
SIO 60-395	Chitonotus pugetensis	Mexico	Baja California			30.9667	39.624
CAS 38741	Chitonotus pugetensis	United States	California			36.7866	40
OS Fishes:11335	Chitonotus pugetensis	Canada	British Columbia			49.5593	40
MCZ Ich:61337	Chitonotus pugetensis					48.6331	40.2336
SIO 51-212	Chitonotus pugetensis	United States	California			34.0167	42.0624
UW 25382	Chitonotus pugetensis	USA	WASHINGTON	KING		47.5755	42.672
SIO 51-261	Chitonotus pugetensis	United States	California			33.875	42.672
SIO 51-232	Chitonotus pugetensis	United States	California			32.3833	42.9768
UW 47675	Chitonotus pugetensis	USA	WASHINGTON			48.1484	43.8912
UW 47676	Chitonotus pugetensis	USA	WASHINGTON			48.4869	43.8912
UW 25383	Chitonotus pugetensis	USA	WASHINGTON	KING		47.9983	45.72
SIO 02-19	Chitonotus pugetensis	United States	California			32.7157	45.72
UW 155523	Chitonotus pugetensis	USA	WASHINGTON	ISLAND		47.9951	46.7
SIO 51-31	Chitonotus pugetensis	Mexico	Baja California			31.8	47.5488
OS Fishes:6542	Chitonotus pugetensis	United States	Oregon			44.61	50
SU 10915	Chitonotus pugetensis	United States	California			34.3389	53.0352
SU 10916	Chitonotus pugetensis	United States	California			34.3417	53.0352
CAS 12938	Chitonotus pugetensis	United States	California			37.8196	54.864
SU 3713	Chitonotus pugetensis	United States	California			37.8917	54.864
CAS 31096	Chitonotus pugetensis	United States	California			36.8118	54.864
CAS 216331	Chitonotus pugetensis	United States	California			36.8118	54.864
SU 16008	Chitonotus pugetensis	United States	California	Monterey		36.7866	54.864
UW 110331	Chitonotus pugetensis	USA	WASHINGTON			47.6249	54.864
UW 110338	Chitonotus pugetensis	USA	WASHINGTON			47.7018	54.864
SIO 74-191	Chitonotus pugetensis	United States	California			32.75	54.864
SIO 49-166	Chitonotus pugetensis	United States	California			32.5517	54.864
SIO 51-247	Chitonotus pugetensis	United States	California			34.0083	56.6928
UW 47440	Chitonotus pugetensis	USA	CALIFORNIA			48.5514	58
SIO 11-364	Chitonotus pugetensis	United States	California			32.8667	60
UW 1184	Chitonotus pugetensis	USA	WASHINGTON	SAN JUAN		48.6331	60.96
SIO 57-119	Chitonotus pugetensis	United States	California			32.8667	60.96
SIO 85-145	Chitonotus pugetensis	United States	California			39.095	62.1792
OS Fishes:14869	Chitonotus pugetensis					44.9681	63
CAS 30786	Chitonotus pugetensis	United States	California			37.8157	64.008
CAS 30787	Chitonotus pugetensis	United States	California			37.8157	64.008
CAS 31050	Chitonotus pugetensis	United States	California			37.8157	64.008
UW 47459	Chitonotus pugetensis	USA	CALIFORNIA			48.0145	65
SU 4018	Chitonotus pugetensis	United States	California			38.025	67.6656
MCZ Ich:61744	Chitonotus pugetensis					48.4869	69.4944
UW 22177	Chitonotus pugetensis	USA	WASHINGTON	KITSAP		48.5767	70
SIO 85-155	Chitonotus pugetensis	United States	California			37.1833	71.3232
SU 40898	Chitonotus pugetensis					36.6625	73.152
CAS 12807	Chitonotus pugetensis	United States	California			37.5144	73.152
SU 39837	Chitonotus pugetensis	United States	California			36.7167	73.152
CAS 216324	Chitonotus pugetensis	United States	California	Sonoma		38.4505	73.152
UW 112150	Chitonotus pugetensis	USA	WASHINGTON			47.662	73.152
SIO 60-468	Chitonotus pugetensis	Mexico	Baja California			30.285	73.152
SIO 85-149	Chitonotus pugetensis	United States	California			38.0533	73.152
OS Fishes:6352	Chitonotus pugetensis	United States	Oregon	Lincoln County		44.6368	73.152
SIO 83-119	Chitonotus pugetensis	United States	California			39.3333	77.724
SU 3714	Chitonotus pugetensis	United States	California			37.0833	78.6384
SIO 85-151	Chitonotus pugetensis	United States	California			37.5983	78.6384
SIO 83-172	Chitonotus pugetensis	United States	California			39.3333	79.248
SIO 71-101	Chitonotus pugetensis	Mexico	Baja California			28.8583	80.4672
SU 39776	Chitonotus pugetensis	United States	California			33.2833	82.296
SIO 60-471	Chitonotus pugetensis	Mexico	Baja California			31.33	82.296
SIO 94-223	Chitonotus pugetensis	United States	Alaska			51.9017	83
UW 22350	Chitonotus pugetensis	USA	WASHINGTON	JEFFERSON		48.4869	84.1248
SIO 50-42	Chitonotus pugetensis	Mexico	Baja California Sur			20.1717	84.1248
SIO 85-140	Chitonotus pugetensis	United States	California			39.325	85.9536
SIO 63-239	Chitonotus pugetensis	Mexico	Baja California			32.5033	85.9536
UW 112197	Chitonotus pugetensis	USA	WASHINGTON			48.5722	91
CAS 216333	Chitonotus pugetensis	United States	California	Los Angeles		33.318	91.44
SIO 83-105	Chitonotus pugetensis	United States	California			32.8167	91.44
SIO 88-119	Chitonotus pugetensis	United States	California			35.5	93.2688
SIO 78-86	Chitonotus pugetensis	Mexico	Baja California			29.1717	96.9264
SIO 83-120	Chitonotus pugetensis	United States	California			39.3333	98.7552
SIO 83-118	Chitonotus pugetensis	United States	California			39.3333	98.7552
SIO 71-102	Chitonotus pugetensis	Mexico	Baja California			28.8667	98.7552
SIO 73-406	Chitonotus pugetensis	United States	California			33.25	100.584
SU 88	Chitonotus pugetensis	Mexico	Baja California			28.975	106.07
UW 2327	Chitonotus pugetensis	USA	WASHINGTON			37.5628	109.728
UW 47298	Chitonotus pugetensis	USA	WASHINGTON			47.7167	109.728
UW 2563	Chitonotus pugetensis	USA	WASHINGTON			47.7003	109.728
OS Fishes:14872	Chitonotus pugetensis					44.9467	119
CAS 234375	Chitonotus pugetensis	United States	California			37.6442	124.358
SU 6340	Chitonotus pugetensis	United States	California			32.575	126.187
SU 10919	Chitonotus pugetensis	United States	California			32.575	126.187
SU 10920	Chitonotus pugetensis	United States	California			32.575	126.187
SU 10921	Chitonotus pugetensis	United States	California			32.575	126.187
SU 10922	Chitonotus pugetensis	United States	California			32.575	126.187
SU 10923	Chitonotus pugetensis	United States	California			32.575	126.187
SU 10924	Chitonotus pugetensis	United States	California			32.575	126.187
SU 10925	Chitonotus pugetensis	United States	California			32.575	126.187
SU 10926	Chitonotus pugetensis	United States	California			32.575	126.187
SU 10927	Chitonotus pugetensis	United States	California			32.575	126.187
UW 25396	Chitonotus pugetensis	USA	WASHINGTON	JEFFERSON		47.7695	137.16
SIO 60-424	Chitonotus pugetensis	United States	California			40.55	138.989
OS Fishes:13514	Chitonotus pugetensis	United States	Oregon			44.155	160.6
SIO 69-435	Chitonotus pugetensis	United States	California			32.7167	182.88
OS Fishes:11749	Chitonotus pugetensis	United States	Oregon	Pacific Ocean		44.9667	200
CAS 28295	Clinocottus acuticeps	United States	California	Sonoma	Tidepool	38.5649	0
CAS 50405	Clinocottus acuticeps	United States	California	Sonoma	Tidepool	38.4163	0
CAS 216267	Clinocottus acuticeps	United States	California	Sonoma	Tidepool	38.3121	0
UAM 6248	Clinocottus acuticeps	United States	AK	Mission Beach, Kodiak Island, AK	Tidepool	57.7992	0
UAM 6260	Clinocottus acuticeps	United States	AK	Mill Bay, Kodiak Isaland, AK	Tidepool	57.8212	0
UAM 47677	Clinocottus acuticeps	United States	AK	Adak Island, Bay of Islands	Tidepool	51.8	0
UAM 47678	Clinocottus acuticeps	United States	AK	Adak Island, Expedition Harbor	Tidepool	51.8019	0
UAM 47680	Clinocottus acuticeps	United States	AK	Adak Island, Point East oF North Rocks	Tidepool	51.8285	0
UAM 47682	Clinocottus acuticeps	United States	AK	Adak Island, Cliff Point	Tidepool	51.8445	0
UAM 47689	Clinocottus acuticeps	United States	AK	Rat Island, USFWS Research Station	Tidepool	51.7952	0
UAM 47693	Clinocottus acuticeps	United States	AK	Attu Island, Loaf Island	Tidepool	52.8364	0
UAM 47696	Clinocottus acuticeps	United States	AK	Attu Island, Murder Point	Tidepool	52.796	0
UAM 47713	Clinocottus acuticeps	United States	AK	Tanaga Island, Bay NE of Whip Island	Tidepool	51.6661	0
UAM 47718	Clinocottus acuticeps	United States	AK	Adak Island, Kuluk	Tidepool	51.9083	0
UAM_2947	Clinocottus acuticeps	United States	AK	Sitka, Nat. Historic Park	Tidepool	57.0488	0
UAM_4693	Clinocottus acuticeps	United States	AK	Kodiak, Surfer's Beach	Tidepool	57.4338	0
UAM_4694	Clinocottus acuticeps	United States	AK	Kodiak, Chiniak	Tidepool	57.6194	0
UAM_2966	Clinocottus acuticeps	United States	WA	Neah Bay	Tidepool	48.3721	0
UAM_2973	Clinocottus acuticeps	United States	OR	Newport, Boiler Bay	Tidepool	44.8299	0
UAM_4679	Clinocottus acuticeps	Canada	BC	Ucluelet, Wya Point	Tidepool	48.962	0
UAM_4684	Clinocottus acuticeps	Canada	BC	Ucluelet, Wya Point	Tidepool	48.962	0
UAM_4689	Clinocottus acuticeps	Canada	BC	Ucluelet, Wya Point	Tidepool	48.962	0
UW 1468	Clinocottus acuticeps	USA	WASHINGTON		Tidepool	48.5514	0
UW 2681	Clinocottus acuticeps	USA	ALASKA		Tidepool	59.6704	0
UW 25609	Clinocottus acuticeps	USA	ALASKA		Tidepool	51.5006	0
UW 25614	Clinocottus acuticeps	USA	ALASKA		Tidepool	51.5006	0
UW 889	Clinocottus acuticeps	USA	OREGON		Tidepool	43.3063	0
UW 1455	Clinocottus acuticeps	USA	WASHINGTON		Tidepool	47.9667	0
OS Fishes:6539	Clinocottus acuticeps	United States	Oregon	Barview	Tidepool	43.3543	0
UBC 900105	Clinocottus acuticeps	Canada	British Columbia	HELBY island	Tidepool	48.8507	0
UBC 900109	Clinocottus acuticeps	Canada	British Columbia	HELBY island	Tidepool	48.8507	0
UBC 900071	Clinocottus acuticeps	Canada	British Columbia	HELBY island	Tidepool	48.8507	0
UBC 900074	Clinocottus acuticeps	Canada	British Columbia	HELBY island	Tidepool	48.8507	0
UBC 900041	Clinocottus acuticeps	Canada	British Columbia	HELBY island	Tidepool	48.8507	0
UBC 900046	Clinocottus acuticeps	Canada	British Columbia	HELBY island	Tidepool	48.8507	0
UBC 900021	Clinocottus acuticeps	Canada	British Columbia	HELBY island	Tidepool	48.8507	0
UBC 900035	Clinocottus acuticeps	Canada	British Columbia	HELBY island	Tidepool	48.8507	0
UBC 550357	Clinocottus acuticeps	Canada	British Columbia	VANCOUVER City	Tidepool	49.2827	0
UBC 631313	Clinocottus acuticeps	United States (c	Alaska	ADAK	Tidepool	51.88	0
UBC 650009	Clinocottus acuticeps	United States (c	Alaska	AGATTU	Tidepool	52.4221	0
UBC 650008	Clinocottus acuticeps	United States (c	Alaska	AGATTU	Tidepool	52.4221	0
UBC 631004	Clinocottus acuticeps	United States (c	Alaska	ATTU	Tidepool	52.8763	0
UBC 630883	Clinocottus acuticeps	United States (c	Alaska	ATTU	Tidepool	52.8763	0
UBC 631008	Clinocottus acuticeps	United States (c	Alaska	ATTU	Tidepool	52.8763	0
UBC 630886	Clinocottus acuticeps	United States (c	Alaska	ATTU	Tidepool	52.8763	0
UBC 631006	Clinocottus acuticeps	United States (c	Alaska	ATTU	Tidepool	52.8763	0
UBC 630893	Clinocottus acuticeps	United States (c	Alaska	ATTU	Tidepool	52.8763	0
UBC 630891	Clinocottus acuticeps	United States (c	Alaska	ATTU	Tidepool	52.8763	0
UBC 630876	Clinocottus acuticeps	United States (c	Alaska	ATTU	Tidepool	52.8763	0
UBC 650540	Clinocottus acuticeps	United States	Alaska	Cape spencer	Tidepool	58.2114	0
UBC 630334	Clinocottus acuticeps	United States (c	Alaska	CHERNABURA	Tidepool	54.7875	0
UBC 631080	Clinocottus acuticeps	United States (c	Alaska	UNIMAK	Tidepool	53.2239	0
UBC 610006	Clinocottus acuticeps	United States (c	Washington	Neah Bay	Tidepool	48.3681	0
UMMZ FISH:93246	Clinocottus acuticeps	USA	Oregon	Tillamook	Tidepool	45.7676	0
UMMZ FISH:93247	Clinocottus acuticeps	USA	Oregon	Tillamook	Tidepool	45.7676	0
UW 151641	Clinocottus acuticeps	USA	ALASKA		Tidepool	59.46	0
UW 151649	Clinocottus acuticeps	CANADA	BRITISH COLUMBIA		Tidepool	49.12	0
LACM Fish:8958.002	Clinocottus acuticeps	United States	Oregon	Curry	Tidepool	42.0498	0
UW 645	Clinocottus acuticeps	USA	WASHINGTON		Tidepool	47.6477	0
CAS 25169	Clinocottus acuticeps	United States	California	Del Norte	Tidepool	41.7856	0
SU 19025	Clinocottus acuticeps	United States	Alaska		Tidepool	58.271	0
CAS 27577	Clinocottus acuticeps	United States	California	Marin	Tidepool	38.2508	0
CAS 216270	Clinocottus acuticeps	United States	California	Marin	Tidepool	37.8911	0
CAS 28609	Clinocottus acuticeps	United States	California	Mendocino	Tidepool	38.7781	0
CAS 216269	Clinocottus acuticeps	United States	California	San Mateo	Tidepool	37.5274	0
CAS 18953	Clinocottus acuticeps	United States	California	San Mateo	Tidepool	37.5274	0
LACM Fish:35299.003	Clinocottus acuticeps	United States	California	San Mateo	Tidepool	37.4044	0
UBC 630333	Clinocottus acuticeps	United States (c	Alaska	CHERNABURA	Tidepool	54.7875	0
UBC 630332	Clinocottus acuticeps	United States (c	Alaska	CHERNABURA	Tidepool	54.7875	0
UBC 630331	Clinocottus acuticeps	United States (c	Alaska	CHERNABURA	Tidepool	54.7875	0
UBC 630330	Clinocottus acuticeps	United States (c	Alaska	CHERNABURA	Tidepool	54.7875	0
UBC 630329	Clinocottus acuticeps	United States (c	Alaska	CHERNABURA	Tidepool	54.7875	0
UBC 631306	Clinocottus acuticeps	United States (c	Alaska	NEAR	Tidepool	57.7804	0
UBC 631305	Clinocottus acuticeps	United States (c	Alaska	NEAR	Tidepool	57.7804	0
UBC 630897	Clinocottus acuticeps	United States (c	Alaska	SHEMYA	Tidepool	52.7228	0
UBC 630900	Clinocottus acuticeps	United States (c	Alaska	SHEMYA	Tidepool	52.7228	0
UBC 631069	Clinocottus acuticeps	United States (c	Alaska	UMNAK	Tidepool	53.2239	0
UMMZ FISH:93244	Clinocottus acuticeps	USA	Oregon	Tillamook	Tidepool	45.4562	0
UMMZ FISH:65468	Clinocottus acuticeps	USA	California	Marin	Tidepool	37.9094	0
UMMZ FISH:93223	Clinocottus acuticeps	USA	Washington	Clallam	Tidepool	47.9081	0
UMMZ FISH:93224	Clinocottus acuticeps	USA	Washington	Clallam	Tidepool	47.9081	0
UMMZ FISH:93231	Clinocottus acuticeps	USA	Washington		Tidepool	47.3042	0
UMMZ FISH:93232	Clinocottus acuticeps	USA	Washington		Tidepool	47.3042	0
UMMZ FISH:93233	Clinocottus acuticeps	USA	Washington		Tidepool	47.3556	0
UMMZ FISH:93234	Clinocottus acuticeps	USA	Washington		Tidepool	47.3556	0
LACM Fish:31941.001	Clinocottus acuticeps	United States	California	Del Norte		41.7474	0
LACM Fish:35980.003	Clinocottus acuticeps	United States	California	Humboldt		41.1223	0
SIO 63-1065	Clinocottus acuticeps	United States	Alaska			59.5	0.1524
UW 3617	Clinocottus acuticeps	USA	ALASKA			53.8844	0.1524
SIO 63-1069	Clinocottus acuticeps	United States	Alaska			59.5	0.3048
SIO 63-1066	Clinocottus acuticeps	United States	Alaska			59.5	0.3048
UW 119115	Clinocottus acuticeps	USA	WASHINGTON			47.7	0.5
UMMZ FISH:93239	Clinocottus acuticeps	USA	Oregon	Clatsop		46.1298	0.6096
CAS 25091	Clinocottus acuticeps	United States	California	Del Norte		41.7702	0.6096
UAM_2965	Clinocottus acuticeps	United States	WA	Bremerton, Lions Beach Park		47.5851	1
UW 44216	Clinocottus acuticeps	USA	WASHINGTON			47.7695	1
UW 147	Clinocottus acuticeps	USA	WASHINGTON			47.6062	1
SIO 63-1067	Clinocottus acuticeps	United States	Alaska			59.5	1.2192
CAS 43123	Clinocottus acuticeps	United States	Alaska			57.2997	3
SIO 49-121D	Clinocottus acuticeps	Canada	British Columbia			49.3667	9.144
SU 15324	Clinocottus analis	Mexico	Baja California		Tidepool	30.4273	0
SU 48894	Clinocottus analis	United States	California	San Luis Obispo	Tidepool	35.5792	0
SU 48857	Clinocottus analis	United States	California	San Luis Obispo	Tidepool	35.5444	0
SIO 47-111	Clinocottus analis	Mexico	MX	Baja California Sur	Tidepool	28.2	0
SIO 44-40	Clinocottus analis australis	United States	US	California	Tidepool	33.735	0
SIO 51-54	Clinocottus analis australis	United States	US	California	Tidepool	32.85	0
SIO 48-247	Clinocottus analis australis	Mexico	MX	Baja California	Tidepool	31.875	0
SIO 47-201B	Clinocottus analis australis	Mexico	MX	Baja California	Tidepool	31.55	0
SIO 45-16D	Clinocottus analis australis	Mexico	MX	Baja California	Tidepool	32.1867	0
SIO 46-209	Clinocottus analis	Mexico	MX	Baja California	Tidepool	28.3117	0
SIO 51-98	Clinocottus analis	Mexico	MX	Baja California Sur	Tidepool	27.1	0
SIO 47-89	Clinocottus analis	United States	US	California	Tidepool	34.06	0
SIO 47-17	Clinocottus analis australis	United States	US	California	Tidepool	32.7083	0
SIO 45-16C	Clinocottus analis australis	Mexico	MX	Baja California	Tidepool	32.1867	0
SIO 47-201C	Clinocottus analis australis	Mexico	MX	Baja California	Tidepool	31.55	0
SIO 46-57B	Clinocottus analis	Mexico	MX	Baja California	Tidepool	31.3333	0
SIO 46-57A	Clinocottus analis	Mexico	MX	Baja California	Tidepool	31.3333	0
SIO 47-205A	Clinocottus analis	Mexico	MX	Baja California	Tidepool	31.55	0
SIO 47-205B	Clinocottus analis	Mexico	MX	Baja California	Tidepool	31.55	0
SIO 47-90	Clinocottus analis	United States	US	California	Tidepool	34.06	0
SIO 69-6	Clinocottus analis	United States	US	California	Tidepool	32.85	0
SIO 46-139	Clinocottus analis	Mexico	MX	Baja California	Tidepool	28.8633	0
SIO 45-83	Clinocottus analis	Mexico	MX	Baja California	Tidepool	32.055	0
SIO 47-88	Clinocottus analis	United States	US	California	Tidepool	34.06	0
SIO 47-77	Clinocottus analis	United States	US	California	Tidepool	34.0567	0
SIO 46-156	Clinocottus analis	Mexico	MX	Baja California	Tidepool	28.865	0
SIO 63-1055	Clinocottus analis australis	Mexico	MX	Baja California	Tidepool	30.3733	0
SIO 45-217A	Clinocottus analis australis	Mexico	MX	Baja California	Tidepool	31.53	0
SIO 49-175	Clinocottus analis australis	Mexico	MX	Baja California	Tidepool	31.475	0
SIO 45-87	Clinocottus analis australis	United States	US	California	Tidepool	32.8083	0
SIO 46-201A	Clinocottus analis australis	Mexico	MX	Baja California	Tidepool	28.87	0
SIO 49-174B	Clinocottus analis australis	Mexico	MX	Baja California	Tidepool	31.4667	0
SIO 46-201B	Clinocottus analis australis	Mexico	MX	Baja California	Tidepool	28.87	0
SIO 63-1054	Clinocottus analis australis	Mexico	MX	Baja California	Tidepool	30.375	0
SIO 50-282	Clinocottus analis australis	Mexico	MX	Baja California	Tidepool	31.4667	0
SIO 44-43	Clinocottus analis australis	United States	US	California	Tidepool	33.7367	0
SIO 48-309	Clinocottus analis australis	Mexico	MX	Baja California	Tidepool	31.8717	0
SIO 63-1056	Clinocottus analis australis	Mexico	MX	Baja California	Tidepool	30.3717	0
SIO 46-155	Clinocottus analis	Mexico	MX	Baja California	Tidepool	28.865	0
SIO 45-215C	Clinocottus analis australis	Mexico	MX	Baja California	Tidepool	31.54	0
SIO 46-59	Clinocottus analis	Mexico	MX	Baja California	Tidepool	31.305	0
SIO 46-203	Clinocottus analis	Mexico	MX	Baja California	Tidepool	28.87	0
SIO 47-201A	Clinocottus analis	Mexico	MX	Baja California	Tidepool	31.55	0
SIO 45-16B	Clinocottus analis	Mexico	MX	Baja California	Tidepool	32.1867	0
SIO 45-16A	Clinocottus analis australis	Mexico	MX	Baja California	Tidepool	32.1867	0
SIO 47-93	Clinocottus analis	United States	US	California	Tidepool	33.9183	0
SIO 47-204	Clinocottus analis	Mexico	MX	Baja California	Tidepool	31.55	0
SIO 45-219A	Clinocottus analis	Mexico	MX	Baja California	Tidepool	31.545	0
SIO 50-285	Clinocottus analis	Mexico	MX	Baja California	Tidepool	31.8667	0
SIO 49-174A	Clinocottus analis australis	Mexico	MX	Baja California	Tidepool	31.4667	0
SIO 47-8	Clinocottus analis australis	Mexico	MX	Baja California	Tidepool	32.42	0
SIO 46-147	Clinocottus analis	Mexico	MX	Baja California	Tidepool	28.8633	0
SIO 73-219	Clinocottus analis	United States	US	California	Tidepool	35.6667	0
SIO 45-19B	Clinocottus analis australis	Mexico	MX	Baja California	Tidepool	32.2267	0
SIO 46-117	Clinocottus analis australis	Mexico	MX	Baja California	Tidepool	32.5	0
LACM Fish:48366.001	Clinocottus analis	United States	California	San Luis Obispo	Tidepool	35.6489	0
LACM Fish:49614.003	Clinocottus analis	United States	California	Los Angeles	Tidepool	33.7347	0
LACM Fish:25732	Clinocottus analis	United States	California	San Luis Obispo	Tidepool	35.636	0
LACM Fish:51789.004	Clinocottus analis	United States	California	San Luis Obispo	Tidepool	35.636	0
LACM Fish:47899.001	Clinocottus analis	United States	California	Los Angeles	Tidepool	33.7137	0
LACM Fish:47913.002	Clinocottus analis	United States	California	San Luis Obispo	Tidepool	35.4429	0
LACM Fish:49897.002	Clinocottus analis	United States	California	San Luis Obispo	Tidepool	35.6376	0
LACM Fish:52232.002	Clinocottus analis	United States	California	San Luis Obispo	Tidepool	35.6489	0
LACM Fish:37008.001	Clinocottus analis	Mexico	Baja California		Tidepool	28.0731	0
CAS 5405	Clinocottus analis	Mexico	Baja California		Tidepool	29.0374	0
CAS 5406	Clinocottus analis	Mexico	Baja California		Tidepool	29.0374	0
CAS 5407	Clinocottus analis	Mexico	Baja California		Tidepool	29.0374	0
CAS 5408	Clinocottus analis	Mexico	Baja California		Tidepool	29.0374	0
CAS 5409	Clinocottus analis	Mexico	Baja California		Tidepool	29.0374	0
CAS 5410	Clinocottus analis	Mexico	Baja California		Tidepool	29.0374	0
CAS 216211	Clinocottus analis	United States	California		Tidepool	34.0044	0
CAS 216229	Clinocottus analis	United States	California		Tidepool	36.6295	0
CAS 216233	Clinocottus analis	United States	California		Tidepool	33.9624	0
CAS 237989	Clinocottus analis	United States	California		Tidepool	36.6177	0
SU 39775	Clinocottus analis	United States	California		Tidepool	33.9889	0
SU 64364	Clinocottus analis	United States	California		Tidepool	36.6219	0
CAS 20012	Clinocottus analis	United States	California	Humboldt	Tidepool	40.0206	0
CAS 216226	Clinocottus analis	United States	California	Los Angeles	Tidepool	33.7389	0
CAS 27576	Clinocottus analis	United States	California	Marin	Tidepool	38.2508	0
CAS 216219	Clinocottus analis	United States	California	Marin	Tidepool	37.8911	0
CAS 28218	Clinocottus analis	United States	California	Mendocino	Tidepool	39.3145	0
CAS 216210	Clinocottus analis	United States	California	Monterey	Tidepool	36.1906	0
CAS 216225	Clinocottus analis	United States	California	Monterey	Tidepool	36.4483	0
SU 5513	Clinocottus analis	United States	California	Monterey	Tidepool	36.6295	0
CAS 32984	Clinocottus analis	United States	California	San Luis Obispo	Tidepool	35.6508	0
CAS 32988	Clinocottus analis	United States	California	San Luis Obispo	Tidepool	35.6508	0
CAS 18879	Clinocottus analis	United States	California	San Mateo	Tidepool	37.5274	0
CAS 216221	Clinocottus analis	United States	California	San Mateo	Tidepool	37.5245	0
CAS 216299	Clinocottus analis	United States	California	San Mateo	Tidepool	37.5944	0
CAS 216303	Clinocottus analis	United States	California	San Mateo	Tidepool	37.5274	0
SU 47517	Clinocottus analis	United States	California	San Mateo	Tidepool	37.5042	0
CAS 216318	Clinocottus analis	United States	California	Santa Barbara	Tidepool	34.5544	0
CAS 12718	Clinocottus analis	United States	California	Solano	Tidepool	38.2206	0
CAS 29836	Clinocottus analis	United States	California	Sonoma	Tidepool	38.5964	0
CAS 216265	Clinocottus analis	United States	California	Sonoma	Tidepool	38.3287	0
CAS 5473	Clinocottus analis	Mexico			Tidepool	29.0374	0
CAS 19413	Clinocottus analis	Mexico	Baja California		Tidepool	32.1861	0
CAS 11361	Clinocottus analis	United States	California		Tidepool	32.8124	0
CAS 18840	Clinocottus analis	United States	California		Tidepool	37.5274	0
SU 35385	Clinocottus analis	United States	California		Tidepool	33.5403	0
SU 35391	Clinocottus analis	United States	California	Los Angeles	Tidepool	33.7137	0
SU 35382	Clinocottus analis	United States	California	San Diego	Tidepool	32.7292	0
CAS 18856	Clinocottus analis	United States	California	San Mateo	Tidepool	37.5274	0
CAS 18894	Clinocottus analis	United States	California	San Mateo	Tidepool	37.5274	0
CAS 18915	Clinocottus analis	United States	California	San Mateo	Tidepool	37.5274	0
CAS 18921	Clinocottus analis	United States	California	San Mateo	Tidepool	37.5274	0
CAS 216249	Clinocottus analis	United States	California	San Mateo	Tidepool	37.5274	0
CAS 216261	Clinocottus analis	United States	California	San Mateo	Tidepool	37.5274	0
CAS 216302	Clinocottus analis	United States	California	San Mateo	Tidepool	37.5274	0
CAS 216317	Clinocottus analis	United States	California	San Mateo	Tidepool	37.5274	0
CAS 55619	Clinocottus analis	United States	California	Marin	Tidepool	37.8911	0
SU 24676	Clinocottus analis	United States	California	Monterey	Tidepool	36.6295	0
LACM Fish:2035	Clinocottus analis	United States	California	Los Angeles	Tidepool	33.7698	0
LACM Fish:1988	Clinocottus analis	Mexico	Baja California		Tidepool	30.4833	0
LACM Fish:2583	Clinocottus analis	United States	California	Monterey	Tidepool	36.4535	0
LACM Fish:32054.005	Clinocottus analis	Mexico	Baja California		Tidepool	27.7	0
LACM Fish:35800.003	Clinocottus analis	United States	California	Los Angeles	Tidepool	33.7583	0
LACM Fish:37731.001	Clinocottus analis	United States	California	Los Angeles	Tidepool	33.4253	0
LACM Fish:39974.003	Clinocottus analis	United States	California	San Luis Obispo	Tidepool	35.6502	0
LACM Fish:39976.002	Clinocottus analis	United States	California	Los Angeles	Tidepool	33.4253	0
LACM Fish:45404.001	Clinocottus analis	United States	California	Los Angeles	Tidepool	33.4253	0
LACM Fish:52278.013	Clinocottus analis	United States	California	San Luis Obispo	Tidepool	35.6522	0
LACM Fish:22043	Clinocottus analis	Mexico	Baja California		Tidepool	26.7069	0
LACM Fish:30788.003	Clinocottus analis	United States	California	Monterey	Tidepool	36.4488	0
LACM Fish:38398.001	Clinocottus analis	United States	California	Los Angeles	Tidepool	33.7	0
LACM Fish:38399.001	Clinocottus analis	United States	California	Los Angeles	Tidepool	33.7698	0
LACM Fish:38400.002	Clinocottus analis	United States	California	Santa Barbara	Tidepool	34.4333	0
LACM Fish:38401.001	Clinocottus analis	United States	California	San Luis Obispo	Tidepool	35.65	0
LACM Fish:38402.001	Clinocottus analis	United States	California	San Luis Obispo	Tidepool	35.65	0
LACM Fish:38392.001	Clinocottus analis	Mexico	Baja California		Tidepool	28.3167	0
LACM Fish:38393.001	Clinocottus analis	United States	California	Los Angeles	Tidepool	33.45	0
LACM Fish:38394.001	Clinocottus analis	United States	California	Monterey	Tidepool	36.5833	0
LACM Fish:38396.001	Clinocottus analis	United States	California	Los Angeles	Tidepool	33.7	0
LACM Fish:38397.001	Clinocottus analis	United States	California	Los Angeles	Tidepool	33.7	0
LACM Fish:30789.002	Clinocottus analis	United States	California	Monterey	Tidepool	36.4903	0
LACM Fish:30789.003	Clinocottus analis	United States	California	Monterey	Tidepool	36.4903	0
LACM Fish:4367	Clinocottus analis analis	United States	California	San Mateo	Tidepool	37.5114	0
LACM Fish:4368	Clinocottus analis analis	United States	California	San Mateo	Tidepool	37.5114	0
LACM Fish:4294	Clinocottus analis australis	Mexico	Baja California		Tidepool	27.1333	0
LACM Fish:4164	Clinocottus analis australis	Mexico	Baja California		Tidepool	28.3153	0
OS Fishes:914	Clinocottus analis	United States	California		Tidepool	33.5979	0
OS Fishes:3170	Clinocottus analis	United States	California	Los Angeles County	Tidepool	33.7445	0
OS Fishes:6707	Clinocottus analis	United States	California		Tidepool	33.7445	0
SIO 47-113	Clinocottus analis	Mexico	MX	Baja California Sur	Tidepool	27.6633	0
SIO 75-675	Clinocottus analis	Mexico	MX	Baja California	Tidepool	29.95	0
SIO 50-188	Clinocottus analis australis	Mexico	MX	Baja California	Tidepool	29.1	0
SIO 50-182	Clinocottus analis australis	Mexico	MX	Baja California Sur	Tidepool	26.05	0
SIO 52-229	Clinocottus analis australis	Mexico	MX	Baja California	Tidepool	29.7667	0
SIO 61-2	Clinocottus analis	Mexico	MX	Baja California	Tidepool	30.35	0
SIO 02-24	Clinocottus analis	United States	US	California	Tidepool	32.8328	0
SIO 51-5	Clinocottus analis australis	United States	US	California	Tidepool	32.85	0
UMMZ FISH:64423	Clinocottus analis	USA	California	San Mateo	Tidepool	37.5191	0
UMMZ FISH:64430	Clinocottus analis	USA	California	San Luis Obispo	Tidepool	35.644	0
UMMZ FISH:64437	Clinocottus analis	USA	California	Ventura	Tidepool	34.2746	0
UMMZ FISH:130658	Clinocottus analis	USA	California	Monterey	Tidepool	36.5552	0
UMMZ FISH:130689	Clinocottus analis	USA	California	Los Angeles	Tidepool	33.7142	0
UMMZ FISH:130695	Clinocottus analis	USA	California	Los Angeles	Tidepool	33.7142	0
UMMZ FISH:132103	Clinocottus analis	USA	California		Tidepool	34.0232	0
UMMZ FISH:141266	Clinocottus analis	USA	California		Tidepool	33.7142	0
UMMZ FISH:141281	Clinocottus analis	USA	California		Tidepool	33.7142	0
UMMZ FISH:142392	Clinocottus analis	USA	California	Monterey	Tidepool	37.2167	0
UMMZ FISH:176311	Clinocottus analis	USA	California	San Diego	Tidepool	32.8328	0
UMMZ FISH:176323	Clinocottus analis	USA	California	San Luis Obispo	Tidepool	35.5641	0
UMMZ FISH:186562	Clinocottus analis	USA	California	San Mateo	Tidepool	37.5274	0
UMMZ FISH:66010	Clinocottus analis	USA	California	Marin	Tidepool	37.9094	0
UMMZ FISH:66019	Clinocottus analis	USA	California	Monterey	Tidepool	36.5419	0
UMMZ FISH:141178	Clinocottus analis	USA	California	San Luis Obispo	Tidepool	35.4428	0
UMMZ FISH:64420	Clinocottus analis australis	USA	California		Tidepool	33.8492	0
UMMZ FISH:65495	Clinocottus analis australis	USA	California	San Diego	Tidepool	32.8328	0
SU 16009	Clinocottus analis	United States	California	Monterey		36.6295	0
LACM Fish:3647	Clinocottus analis	United States	California	San Luis Obispo		35.6489	0
LACM Fish:6874.001	Clinocottus analis	United States	California	Los Angeles		33.7238	0
LACM Fish:8627	Clinocottus analis	United States	California	Los Angeles		33.7042	0
LACM Fish:8947.001	Clinocottus analis	United States	California	Los Angeles		33.7699	0
LACM Fish:9950.019	Clinocottus analis	United States	California	San Luis Obispo		35.636	0
LACM Fish:9950.032	Clinocottus analis	United States	California	San Luis Obispo		35.636	0
LACM Fish:31699.008	Clinocottus analis	United States	California	San Luis Obispo		35.2118	0
LACM Fish:31860.003	Clinocottus analis	United States	California	San Luis Obispo		35.2162	0
LACM Fish:32041.013	Clinocottus analis	Mexico	Baja California			28.3206	0
LACM Fish:33384.006	Clinocottus analis	United States	California	Mendocino		38.9271	0
LACM Fish:33712.001	Clinocottus analis	United States	California			38.9088	0
LACM Fish:35695.001	Clinocottus analis	United States	California			33.3879	0
LACM Fish:52130.004	Clinocottus analis	Mexico	Baja California			31.75	0
LACM Fish:52219.005	Clinocottus analis	United States	California	San Luis Obispo		35.6511	0
LACM Fish:52220.002	Clinocottus analis	United States	California	San Luis Obispo		35.6509	0
LACM Fish:52130.003	Clinocottus analis	Mexico	Baja California			31.75	0
LACM Fish:52244.007	Clinocottus analis	United States	California	San Luis Obispo		35.6505	0
SIO 72-93	Clinocottus analis	United States	US	California		35.65	0.0508
SIO 47-82	Clinocottus analis	United States	US	California		34.06	0.0762
SIO 52-17	Clinocottus analis	Mexico	MX	Baja California		31.55	0.127
SIO 69-250	Clinocottus analis	United States	US	California		35.65	0.1524
SIO 80-18	Clinocottus analis	United States	US	California		35.65	0.1524
SIO 73-217	Clinocottus analis	United States	US	California		35.6667	0.1524
SIO 46-4A	Clinocottus analis	Mexico	MX	Baja California		30.93	0.1524
SIO 71-109	Clinocottus analis	Mexico	MX	Baja California		29.0017	0.2
SIO 58-330	Clinocottus analis	United States	US	California		32.8667	0.2032
SIO 47-77A	Clinocottus analis	United States	US	California		34.055	0.254
SIO 46-3	Clinocottus analis	Mexico	MX	Baja California		30.96	0.254
SIO 69-249	Clinocottus analis	United States	US	California		35.65	0.3048
SIO 80-21	Clinocottus analis	United States	US	California		35.6667	0.3048
SIO 73-221	Clinocottus analis	United States	US	California		35.6667	0.3048
SU 18418	Clinocottus analis	Mexico	Baja California			27.6594	0.3048
SIO 69-149	Clinocottus analis	Mexico	MX	Baja California Sur		27.6833	0.3048
SIO 48-57A	Clinocottus analis	Mexico	MX	Baja California Sur		27.6917	0.3048
SIO 46-4C	Clinocottus analis	Mexico	MX	Baja California		30.93	0.3048
SIO 44-20	Clinocottus analis australis	United States	US	California		32.8717	0.3048
SIO 47-70	Clinocottus analis australis	Mexico	MX	Baja California		31.8617	0.3048
SIO 72-90	Clinocottus analis	United States	US	California		35.65	0.3048
SIO 45-201B	Clinocottus analis australis	Mexico	MX	Baja California		32.2633	0.381
SIO 48-65	Clinocottus analis	Mexico	MX	Baja California Sur		27.6833	0.4572
SIO 48-81	Clinocottus analis	Mexico	MX	Baja California Sur		26.7133	0.4572
SIO 51-226	Clinocottus analis	United States	US	California		33.3833	0.4572
SIO 45-32	Clinocottus analis australis	United States	US	California		32.85	0.4572
SIO 47-15	Clinocottus analis australis	United States	US	California		32.72	0.4572
SIO 45-106	Clinocottus analis australis	United States	US	California		32.8133	0.4572
SIO 47-202	Clinocottus analis australis	Mexico	MX	Baja California		31.55	0.4572
SIO 57-113B	Clinocottus analis australis	Mexico	MX	Baja California		31.295	0.4572
SIO 61-407	Clinocottus analis	Mexico	MX	Baja California		30.3783	0.4572
SIO 51-101	Clinocottus analis	Mexico	MX	Baja California Sur		27.6833	0.4572
SIO 48-41	Clinocottus analis	Mexico	MX	Baja California Sur		27.6917	0.4572
SIO 49-173A	Clinocottus analis australis	Mexico	MX	Baja California		31.55	0.4572
SIO 47-77B	Clinocottus analis	United States	US	California		34.0567	0.508
CAS 19327	Clinocottus analis	Mexico	Baja California			32.1861	0.6096
SIO 02-130	Clinocottus analis	United States	US	California		32.85	0.6096
SIO 63-154	Clinocottus analis	Mexico	MX	Baja California		31.5833	0.6096
SIO 61-403	Clinocottus analis	Mexico	MX	Baja California		30.2833	0.6096
SIO 46-140	Clinocottus analis	Mexico	MX	Baja California		28.8633	0.6096
SIO 48-315	Clinocottus analis	Mexico	MX	Baja California		32.2633	0.6096
SIO 46-141	Clinocottus analis	Mexico	MX	Baja California		28.8633	0.6096
SIO 70-49	Clinocottus analis	Mexico	MX	Baja California		28.8833	0.6096
SIO 63-1049	Clinocottus analis australis	Mexico	MX	Baja California		30.4583	0.6096
SIO 45-200	Clinocottus analis australis	United States	US	California		32.8117	0.6096
SIO 44-17	Clinocottus analis australis	United States	US	California		32.8117	0.6096
SIO 44-39	Clinocottus analis australis	United States	US	California		33.7383	0.6096
SIO 44-41	Clinocottus analis australis	United States	US	California		33.735	0.6096
SIO 44-35	Clinocottus analis australis	United States	US	California		32.8133	0.6096
SIO 44-29	Clinocottus analis australis	United States	US	California		32.8133	0.6096
SIO 45-105	Clinocottus analis australis	United States	US	California		32.8133	0.6096
SIO 47-5A	Clinocottus analis australis	United States	US	California		33.035	0.6096
SIO 44-14	Clinocottus analis australis	United States	US	California		32.8717	0.6096
SIO 52-16	Clinocottus analis	Mexico	MX	Baja California		31.55	0.6096
SIO 69-248	Clinocottus analis	United States	US	California		35.65	0.762
SIO 46-4B	Clinocottus analis	Mexico	MX	Baja California		30.93	0.762
SIO 45-203	Clinocottus analis australis	Mexico	MX	Baja California		32.2767	0.762
SIO 52-113	Clinocottus analis australis	Mexico	MX	Baja California Sur		27.6833	0.762
SIO 69-245	Clinocottus analis	United States	US	California		35.65	0.762
CAS 29491	Clinocottus analis	United States	California	Mendocino		39.3186	0.9144
CAS 29524	Clinocottus analis	United States	California	Mendocino		39.6578	0.9144
SU 49540	Clinocottus analis	United States	California	San Mateo		37.5274	0.9144
SIO 68-610	Clinocottus analis	Mexico	MX	Baja California		30.3667	0.9144
SIO 80-19	Clinocottus analis	United States	US	California		35.65	0.9144
SIO 69-30	Clinocottus analis	United States	US	California		34.0167	0.9144
SIO 73-220	Clinocottus analis	United States	US	California		35.6667	0.9144
SIO 05-81	Clinocottus analis	United States	US	California		32.7	0.9144
SIO 47-2B	Clinocottus analis	United States	US	California		33.0233	0.9144
SIO 48-54	Clinocottus analis	Mexico	MX	Baja California Sur		27.6383	0.9144
SIO 48-52	Clinocottus analis	Mexico	MX	Baja California Sur		27.6383	0.9144
SIO 48-34	Clinocottus analis	Mexico	MX	Baja California Sur		27.675	0.9144
SIO 48-51	Clinocottus analis	Mexico	MX	Baja California Sur		27.6467	0.9144
SIO 49-70	Clinocottus analis	Mexico	MX	Baja California		30.9167	0.9144
SIO 47-203	Clinocottus analis	Mexico	MX	Baja California		31.55	0.9144
SIO 61-404	Clinocottus analis	Mexico	MX	Baja California		30.255	0.9144
SIO 48-85	Clinocottus analis	Mexico	MX	Baja California Sur		26.7983	0.9144
SIO 48-50	Clinocottus analis	Mexico	MX	Baja California Sur		27.6217	0.9144
SIO 47-5B	Clinocottus analis	United States	US	California		33.035	0.9144
SIO 67-297	Clinocottus analis	United States	US	California		35.3333	0.9144
SIO 46-97	Clinocottus analis	United States	US	California		32.8667	0.9144
SIO 48-82	Clinocottus analis	Mexico	MX	Baja California Sur		26.7183	0.9144
SIO 49-59	Clinocottus analis	United States	US	California		32.7617	0.9144
SIO 51-23	Clinocottus analis australis	Mexico	MX	Baja California		31.715	0.9144
SIO 47-19	Clinocottus analis australis	United States	US	California		32.6983	0.9144
SIO 50-51	Clinocottus analis australis	Mexico	MX	Baja California		28.3167	0.9144
SIO 45-20	Clinocottus analis australis	Mexico	MX	Baja California		32.2617	0.9144
SIO 50-51A	Clinocottus analis australis	Mexico	MX	Baja California		28.3167	0.9144
SIO 63-1050	Clinocottus analis australis	Mexico	MX	Baja California		30.4583	0.9144
SIO 44-21	Clinocottus analis australis	United States	US	California		32.85	0.9144
SIO 44-16	Clinocottus analis australis	United States	US	California		32.85	0.9144
SIO 45-6	Clinocottus analis australis	United States	US	California		32.8133	0.9144
SIO 44-36	Clinocottus analis australis	United States	US	California		32.8133	0.9144
SIO 45-201A	Clinocottus analis australis	Mexico	MX	Baja California		32.2633	0.9144
SIO 49-68	Clinocottus analis australis	Mexico	MX	Baja California		30.9167	0.9144
SIO 45-219B	Clinocottus analis	Mexico	MX	Baja California		31.545	0.9144
CAS 19793	Clinocottus analis	United States	California	San Diego		32.8163	1.0668
SIO 48-308	Clinocottus analis australis	Mexico	MX	Baja California		31.8667	1.0668
SIO 73-216	Clinocottus analis	United States	US	California		35.6667	1.0668
SIO 49-173B	Clinocottus analis australis	Mexico	MX	Baja California		31.55	1.0668
CAS 216216	Clinocottus analis	United States	California	Los Angeles		33.7833	1.2192
SU 48909	Clinocottus analis	United States	California	San Luis Obispo		35.6625	1.2192
SIO 46-58	Clinocottus analis	Mexico	MX	Baja California		31.255	1.2192
SIO 45-118	Clinocottus analis	United States	US	California		32.78	1.2192
SIO 52-115	Clinocottus analis	Mexico	MX	Baja California Sur		27.8333	1.2192
SIO 52-115	Clinocottus analis	Mexico	MX	Baja California Sur		27.8333	1.2192
SIO 50-38	Clinocottus analis	Mexico	MX	Baja California		29.1717	1.2192
SIO 57-114A	Clinocottus analis	Mexico	MX	Baja California		31.2333	1.2192
SIO 46-19	Clinocottus analis	United States	US	California		32.85	1.2192
SIO 61-405	Clinocottus analis	Mexico	MX	Baja California		30.2833	1.2192
SIO 45-95A	Clinocottus analis	United States	US	California		32.7583	1.2192
SIO 46-95	Clinocottus analis	United States	US	California		32.8667	1.2192
SIO 63-1052	Clinocottus analis australis	Mexico	MX	Baja California		30.43	1.2192
SIO 50-278	Clinocottus analis australis	Mexico	MX	Baja California		30.95	1.2192
SIO 45-215A	Clinocottus analis australis	Mexico	MX	Baja California		31.54	1.2192
SIO 50-47	Clinocottus analis australis	Mexico	MX	Baja California		28.3167	1.2192
SIO 44-22	Clinocottus analis australis	United States	US	California		32.8133	1.2192
SIO 47-6	Clinocottus analis australis	Mexico	MX	Baja California		32.4133	1.2192
SU 48959	Clinocottus analis	United States	California	Orange		33.5892	1.524
SIO 51-29	Clinocottus analis	Mexico	MX	Baja California		31.73	1.524
SIO 61-410	Clinocottus analis	Mexico	MX	Baja California		30.925	1.524
SIO 61-406	Clinocottus analis	Mexico	MX	Baja California		30.37	1.524
SIO 48-31	Clinocottus analis	Mexico	MX	Baja California Sur		27.6833	1.524
SIO 45-61B	Clinocottus analis analis	United States	US	California		32.7583	1.524
SIO 50-279	Clinocottus analis australis	Mexico	MX	Baja California		30.4333	1.524
SIO 72-92	Clinocottus analis	United States	US	California		35.65	1.8288
SIO 57-116	Clinocottus analis	Mexico	MX	Baja California		31.2333	1.8288
SIO 50-52	Clinocottus analis australis	Mexico	MX	Baja California		28.3167	1.8288
SIO 57-113A	Clinocottus analis australis	Mexico	MX	Baja California		31.295	1.8288
SIO 57-116	Clinocottus analis australis	Mexico	MX	Baja California		31.2333	1.8288
SIO 45-104	Clinocottus analis australis	United States	US	California		32.8667	2.1336
LACM Fish:31992.008	Clinocottus analis	United States	California	Los Angeles		33.7269	2.4
SIO 69-152	Clinocottus analis	Mexico	MX	Baja California Sur		27.6833	2.4384
SIO 50-35	Clinocottus analis	Mexico	MX	Baja California		29.1667	2.4384
SIO 45-148A	Clinocottus analis	United States	US	California		32.85	3.048
SIO 61-1	Clinocottus analis	United States	US	California		32.7667	3.048
SIO 46-101	Clinocottus analis	United States	US	California		32.8667	3.048
SIO 52-201	Clinocottus analis australis	Mexico	MX	Baja California		29.1	3.048
SIO 51-21	Clinocottus analis australis	Mexico	MX	Baja California		31.7167	3.048
SIO 52-166	Clinocottus analis australis	Mexico	MX	Baja California		28.8667	3.048
SIO 48-44	Clinocottus analis	Mexico	MX	Baja California Sur		27.6667	3.6576
SIO 45-156	Clinocottus analis australis	United States	US	California		32.8717	3.6576
SIO 67-151	Clinocottus analis	United States	US	California		35.65	3.6576
SIO 51-234	Clinocottus analis	United States	US	California		33.4483	4.572
SIO 75-663	Clinocottus analis	Mexico	MX	Baja California Sur		27.6833	4.572
SIO 47-102	Clinocottus analis australis	United States	US	California		32.825	4.572
SIO 54-11	Clinocottus analis saburrae	United States	US	California		32.7583	4.572
SIO 65-71	Clinocottus analis	Mexico	MX	Baja California		29.1717	6.096
SIO 52-218	Clinocottus analis australis	Mexico	MX	Baja California		30.4833	6.096
SIO 59-303	Clinocottus analis australis	Mexico	MX	Baja California		31.7467	6.096
SIO 52-164	Clinocottus analis australis	Mexico	MX	Baja California		28.75	7.62
SIO 52-155	Clinocottus analis australis	Mexico	MX	Baja California		28.4167	7.62
SIO 59-305	Clinocottus analis australis	Mexico	MX	Baja California		31.8	7.62
SIO 51-249	Clinocottus analis	United States	US	California		34.025	7.62
SIO 51-239	Clinocottus analis	United States	US	California		34.0333	9.144
SIO 55-73A	Clinocottus analis	United States	US	California		32.9	9.144
SIO 52-202	Clinocottus analis	Mexico	MX	Baja California		29.1117	9.144
SIO 52-168	Clinocottus analis australis	Mexico	MX	Baja California		28.8667	9.144
SIO 54-191	Clinocottus analis	United States	US	California		34.0583	10.668
SIO 48-43	Clinocottus analis	Mexico	MX	Baja California Sur		27.6683	14.6304
SIO 51-19B	Clinocottus analis	Mexico	MX	Baja California		31.7333	14.6304
SIO 51-19	Clinocottus analis	Mexico	MX	Baja California		31.7333	14.6304
SIO 51-19A	Clinocottus analis	Mexico	MX	Baja California		31.735	14.6304
SIO 65-53	Clinocottus analis	Mexico	MX	Baja California		29.1717	24.384
SIO 47-96	Clinocottus analis	United States	US	California		34.0117	33.8328
SIO 47-103	Clinocottus analis australis	United States	US	California		32.8267	36.576
SIO 45-55	Clinocottus embryum	United States	California		Tidepool	36.4467	0
CAS 25124	Clinocottus embryum	United States	California	Del Norte	Tidepool	41.7856	0
CAS 31053	Clinocottus embryum	United States	California		Tidepool	38.955	0
CAS 31340	Clinocottus embryum	United States	California		Tidepool	38.955	0
CAS 28129	Clinocottus embryum	United States	California	Mendocino	Tidepool	39.6624	0
CAS 48219	Clinocottus embryum	United States	California	Monterey	Tidepool	36.6113	0
CAS 78466	Clinocottus embryum	United States	California	San Mateo	Tidepool	37.1819	0
SU 68342	Clinocottus embryum	United States	California	Santa Cruz	Tidepool	36.9498	0
CAS 27369	Clinocottus embryum	United States	California	Sonoma	Tidepool	38.2614	0
SU 35394	Clinocottus embryum	United States	California	Monterey	Tidepool	36.5194	0
LACM Fish:2609	Clinocottus embryum	United States	California	Monterey	Tidepool	36.4452	0
LACM Fish:33707.001	Clinocottus embryum	United States	California		Tidepool	38.945	0
OS Fishes:6713	Clinocottus embryum	United States	Oregon	Lincoln County	Tidepool	44.4972	0
UAM 47681	Clinocottus embryum	USA	AK	Adak Island, Point East oF North Rocks	Tidepool	51.8285	0
UAM 47683	Clinocottus embryum	USA	AK	Adak Island, Cliff Point	Tidepool	51.8445	0
UAM 47686	Clinocottus embryum	USA	AK	Adak Island, Lucky Point	Tidepool	51.8555	0
UAM 47690	Clinocottus embryum	USA	AK	Rat Island, USFWS Research Station	Tidepool	51.7952	0
UAM 47694	Clinocottus embryum	USA	AK	Attu Island, Loaf Island	Tidepool	52.8364	0
UAM 47695	Clinocottus embryum	USA	AK	Attu Island, Casco Point	Tidepool	52.8254	0
UAM 47697	Clinocottus embryum	USA	AK	Attu Island, Murder Point	Tidepool	52.796	0
UAM 47701	Clinocottus embryum	USA	AK	Agattu Island, Karab Cove	Tidepool	52.3781	0
UAM 47704	Clinocottus embryum	USA	AK	Amchitka Island, Kirilof Bay	Tidepool	51.4155	0
UAM 47707	Clinocottus embryum	USA	AK	Ogliuga Island, NNE Coast	Tidepool	51.6117	0
UAM 47714	Clinocottus embryum	USA	AK	Tanaga Island, Bay NE of Whip Island	Tidepool	51.6661	0
UAM 47719	Clinocottus embryum	USA	AK	Adak Island, Kuluk	Tidepool	51.9083	0
UAM 47722	Clinocottus embryum	USA	AK	Adak Island, Loran Station	Tidepool	51.9853	0
UAM_2948	Clinocottus embryum	USA	AK	Sitka, Nat. Historic Park	Tidepool	57.0488	0
UAM_2954	Clinocottus embryum	USA	AK	Sitka, Japonski Island	Tidepool	57.056	0
UAM_4695	Clinocottus embryum	USA	AK	Kodiak, Chiniak	Tidepool	57.4338	0
UAM_2967	Clinocottus embryum	USA	WA	Neah Bay	Tidepool	48.3721	0
UAM_2974	Clinocottus embryum	USA	OR	Newport, Boiler Bay	Tidepool	44.8299	0
UAM_4680	Clinocottus embryum	Canada	BC	Ucluelet, Wya Point	Tidepool	48.962	0
UAM_4690	Clinocottus embryum	Canada	BC	Ucluelet, Wya Point	Tidepool	48.962	0
UAM 6165	Clinocottus embryum	USA	AK	Kasitsna Bay	Tidepool	59.4681	0
UBC 900077	Clinocottus embryum	Canada			Tidepool	48.8507	0
UBC 900120	Clinocottus embryum	Canada			Tidepool	48.8507	0
UBC 900061	Clinocottus embryum	Canada			Tidepool	48.8507	0
UBC 900179	Clinocottus embryum	Canada			Tidepool	48.8507	0
UBC 900094	Clinocottus embryum	Canada			Tidepool	48.8507	0
UBC 900113	Clinocottus embryum	Canada			Tidepool	48.8507	0
UBC 900084	Clinocottus embryum	Canada			Tidepool	48.8507	0
UBC 900090	Clinocottus embryum	Canada			Tidepool	48.8507	0
UBC 900064	Clinocottus embryum	Canada			Tidepool	48.8507	0
UBC 900134	Clinocottus embryum	Canada			Tidepool	48.8507	0
UBC 900129	Clinocottus embryum	Canada			Tidepool	48.8507	0
UBC 900127	Clinocottus embryum	Canada			Tidepool	48.8507	0
UBC 900152	Clinocottus embryum	Canada			Tidepool	48.8507	0
UBC 900071	Clinocottus embryum	Canada			Tidepool	48.8507	0
UBC 900104	Clinocottus embryum	Canada			Tidepool	48.8507	0
UBC 900177	Clinocottus embryum	Canada			Tidepool	48.8507	0
UBC 900088	Clinocottus embryum	Canada			Tidepool	48.8507	0
UBC 900070	Clinocottus embryum	Canada			Tidepool	48.8507	0
UBC 900056	Clinocottus embryum	Canada			Tidepool	48.8507	0
UBC 900063	Clinocottus embryum	Canada			Tidepool	48.8507	0
UBC 900081	Clinocottus embryum	Canada			Tidepool	48.8507	0
UBC 900180	Clinocottus embryum	Canada			Tidepool	48.8507	0
UBC 900114	Clinocottus embryum	Canada			Tidepool	48.8507	0
UBC 900085	Clinocottus embryum	Canada			Tidepool	48.8507	0
UBC 900072	Clinocottus embryum	Canada			Tidepool	48.8507	0
UBC 900146	Clinocottus embryum	Canada			Tidepool	48.8507	0
UBC 900062	Clinocottus embryum	Canada			Tidepool	48.8507	0
UBC 900097	Clinocottus embryum	Canada			Tidepool	48.8507	0
UBC 900055	Clinocottus embryum	Canada			Tidepool	48.8507	0
UBC 900176	Clinocottus embryum	Canada			Tidepool	48.8507	0
UBC 900188	Clinocottus embryum	Canada			Tidepool	48.8507	0
UBC 900057	Clinocottus embryum	Canada			Tidepool	48.8507	0
UBC 900087	Clinocottus embryum	Canada			Tidepool	48.8507	0
UBC 900187	Clinocottus embryum	Canada			Tidepool	48.8507	0
UBC 900083	Clinocottus embryum	Canada			Tidepool	48.8507	0
UBC 900074	Clinocottus embryum	Canada			Tidepool	48.8507	0
UBC 900060	Clinocottus embryum	Canada			Tidepool	48.8507	0
UBC 900059	Clinocottus embryum	Canada			Tidepool	48.8507	0
UBC 900167	Clinocottus embryum	Canada			Tidepool	48.8507	0
UBC 900046	Clinocottus embryum	Canada			Tidepool	48.8507	0
UBC 900021	Clinocottus embryum	Canada			Tidepool	48.8507	0
UBC 900049	Clinocottus embryum	Canada			Tidepool	48.8507	0
UBC 900031	Clinocottus embryum	Canada			Tidepool	48.8507	0
UBC 900024	Clinocottus embryum	Canada			Tidepool	48.8507	0
UBC 900032	Clinocottus embryum	Canada			Tidepool	48.8507	0
UBC 900011	Clinocottus embryum	Canada			Tidepool	48.8507	0
UBC 900027	Clinocottus embryum	Canada			Tidepool	48.8507	0
UBC 631313	Clinocottus embryum	United States (c			Tidepool	51.7616	0
UBC 620942	Clinocottus embryum	United States (c			Tidepool	51.7616	0
UBC 630902	Clinocottus embryum	United States (c			Tidepool	51.7616	0
UBC 631106	Clinocottus embryum	United States (c			Tidepool	51.5006	0
UBC 650529	Clinocottus embryum	United States (c			Tidepool	56.9974	0
UBC 650528	Clinocottus embryum	United States (c			Tidepool	56.9974	0
UBC 630165	Clinocottus embryum	United States (c			Tidepool	56.9974	0
UBC 630155	Clinocottus embryum	United States (c			Tidepool	56.9974	0
UBC 650579	Clinocottus embryum	United States (c			Tidepool	54.8014	0
UBC 650584	Clinocottus embryum	United States (c			Tidepool	54.8054	0
UBC 650514	Clinocottus embryum	United States (c			Tidepool	55.7794	0
UBC 650513	Clinocottus embryum	United States (c			Tidepool	55.7794	0
UBC 630898	Clinocottus embryum	United States (c			Tidepool	52.7228	0
UBC 631078	Clinocottus embryum	United States (c			Tidepool	53.2239	0
UBC 631069	Clinocottus embryum	United States (c			Tidepool	53.2239	0
UBC 650138	Clinocottus embryum	United States (c			Tidepool	53.5828	0
UMMZ FISH:92890	Clinocottus embryum	USA	Oregon	Tillamook	Tidepool	45.4562	0
UW 640	Clinocottus embryum	USA	WASHINGTON	KITSAP	Tidepool	47.6477	0
UW 936	Clinocottus embryum	USA	OREGON	COOS	Tidepool	43.3063	0
UW 1013	Clinocottus embryum	USA	WASHINGTON	SAN JUAN	Tidepool	48.5514	0
UW 888	Clinocottus embryum	USA	OREGON	COOS	Tidepool	43.3063	0
UW 1027	Clinocottus embryum	USA	WASHINGTON	SAN JUAN	Tidepool	48.5514	0
UW 22440	Clinocottus embryum	USA	WASHINGTON	CLALLAM	Tidepool	48.2611	0
UW 20916	Clinocottus embryum	USA	ALASKA		Tidepool	51.88	0
UW 20917	Clinocottus embryum	USA	ALASKA		Tidepool	51.88	0
CAS 45970	Clinocottus embryum	United States	Alaska			59.995	0
LACM Fish:35980.004	Clinocottus embryum	United States	California	Humboldt		41.1223	0
CAS 27804	Clinocottus embryum	United States	California	Mendocino		38.9089	0.4572
CAS 29492	Clinocottus embryum	United States	California	Mendocino		39.3186	0.9144
SIO 51-23	Clinocottus embryum	Mexico	Baja California			31.715	0.9144
CAS 35072	Clinocottus embryum	United States	California	Ventura		34.008	1.0668
SIO 51-21	Clinocottus embryum	Mexico	Baja California			31.7167	3.048
SIO 51-249	Clinocottus embryum	United States	California			34.025	7.62
LACM Fish:51789.005	Clinocottus globiceps	United States	California	San Luis Obispo	Tidepool	35.636	0
LACM Fish:8958.003	Clinocottus globiceps	United States	Oregon	Curry	Tidepool	42.0498	0
LACM Fish:47754.002	Clinocottus globiceps	United States	California	Santa Barbara	Tidepool	34.4672	0
LACM Fish:33384.007	Clinocottus globiceps	United States	California	Mendocino	Tidepool	38.9271	0
CAS 29799	Clinocottus globiceps	United States	California	Humboldt	Tidepool	40.0211	0
CAS 29260	Clinocottus globiceps	United States	California	Humboldt	Tidepool	40.13	0
CAS 25148	Clinocottus globiceps	United States	California	Humboldt	Tidepool	41.0555	0
OS Fishes:6538	Clinocottus globiceps	United States	Oregon	Lincoln County	Tidepool	44.6737	0
CAS 25125	Clinocottus globiceps	United States	California	Del Norte	Tidepool	41.7856	0
CAS 25168	Clinocottus globiceps	United States	California	Del Norte	Tidepool	41.7856	0
CAS 25135	Clinocottus globiceps	United States	California	Del Norte	Tidepool	41.7856	0
SU 48858	Clinocottus globiceps	United States	California	San Luis Obispo	Tidepool	35.5444	0
SU 61454	Clinocottus globiceps	United States	California		Tidepool	36.4793	0
CAS 216427	Clinocottus globiceps	United States	California		Tidepool	37.2415	0
CAS 20056	Clinocottus globiceps	United States	California	Humboldt	Tidepool	40.0206	0
CAS 28625	Clinocottus globiceps	United States	California	Humboldt	Tidepool	40.13	0
CAS 28643	Clinocottus globiceps	United States	California	Humboldt	Tidepool	40.1389	0
CAS 29784	Clinocottus globiceps	United States	California	Humboldt	Tidepool	40.0211	0
CAS 27387	Clinocottus globiceps	United States	California	Marin	Tidepool	37.8911	0
CAS 216481	Clinocottus globiceps	United States	California	Marin	Tidepool	37.8911	0
CAS 19107	Clinocottus globiceps	United States	California	Mendocino	Tidepool	38.8012	0
CAS 28124	Clinocottus globiceps	United States	California	Mendocino	Tidepool	39.6624	0
CAS 28143	Clinocottus globiceps	United States	California	Mendocino	Tidepool	39.13	0
CAS 28219	Clinocottus globiceps	United States	California	Mendocino	Tidepool	39.3145	0
CAS 28610	Clinocottus globiceps	United States	California	Mendocino	Tidepool	38.7781	0
CAS 28823	Clinocottus globiceps	United States	California	Mendocino	Tidepool	38.9167	0
CAS 31099	Clinocottus globiceps	United States	California	Monterey	Tidepool	36.4483	0
CAS 216419	Clinocottus globiceps	United States	California	Monterey	Tidepool	36.4483	0
CAS 18740	Clinocottus globiceps	United States	California	San Mateo	Tidepool	37.4673	0
CAS 216454	Clinocottus globiceps	United States	California	San Mateo	Tidepool	37.5274	0
CAS 216486	Clinocottus globiceps	United States	California	San Mateo	Tidepool	37.5245	0
CAS 222893	Clinocottus globiceps	United States	California	San Mateo	Tidepool	37.5274	0
SU 24651	Clinocottus globiceps	United States	California	San Mateo	Tidepool	37.5274	0
SU 47518	Clinocottus globiceps	United States	California	San Mateo	Tidepool	37.5042	0
SU 60250	Clinocottus globiceps	United States	California	Santa Cruz	Tidepool	36.9498	0
CAS 27306	Clinocottus globiceps	United States	California	Sonoma	Tidepool	38.4069	0
CAS 28296	Clinocottus globiceps	United States	California	Sonoma	Tidepool	38.5649	0
CAS 29837	Clinocottus globiceps	United States	California	Sonoma	Tidepool	38.5964	0
CAS 18863	Clinocottus globiceps	United States	California	San Mateo	Tidepool	37.5274	0
CAS 18907	Clinocottus globiceps	United States	California	San Mateo	Tidepool	37.5274	0
CAS 18913	Clinocottus globiceps	United States	California	San Mateo	Tidepool	37.5274	0
CAS 18948	Clinocottus globiceps	United States	California	San Mateo	Tidepool	37.5274	0
CAS 216428	Clinocottus globiceps	United States	California	San Mateo	Tidepool	37.5274	0
CAS 17778	Clinocottus globiceps	United States	California	Marin	Tidepool	37.8911	0
CAS 55620	Clinocottus globiceps	United States	California	Marin	Tidepool	37.8911	0
CAS 17771	Clinocottus globiceps	United States	California	Sonoma	Tidepool	38.4069	0
LACM Fish:4369	Clinocottus globiceps	United States	California	San Mateo	Tidepool	37.5114	0
LACM Fish:4392	Clinocottus globiceps	United States	California	San Mateo	Tidepool	37.5114	0
LACM Fish:33707.002	Clinocottus globiceps	United States	California		Tidepool	38.945	0
LACM Fish:35299.004	Clinocottus globiceps	United States	California	San Mateo	Tidepool	37.4044	0
LACM Fish:38404.001	Clinocottus globiceps	United States	California	Sonoma	Tidepool	38.295	0
LACM Fish:38405.001	Clinocottus globiceps	United States	California	Mendocino	Tidepool	38.9167	0
LACM Fish:24032	Clinocottus globiceps	United States	Oregon	Coos	Tidepool	43.3386	0
OS Fishes:272	Clinocottus globiceps	United States	Oregon	Pacific Ocean	Tidepool	45.4348	0
OS Fishes:275	Clinocottus globiceps	United States	Oregon	Lincoln County	Tidepool	44.6737	0
OS Fishes:433	Clinocottus globiceps	United States	Oregon	Lincoln County	Tidepool	44.6737	0
OS Fishes:3204	Clinocottus globiceps	United States	Oregon	Curry County	Tidepool	42.0526	0
OS Fishes:3210	Clinocottus globiceps	United States	Oregon	Lincoln County	Tidepool	44.6737	0
OS Fishes:6597	Clinocottus globiceps	United States	Oregon		Tidepool	45.516	0
OS Fishes:6719	Clinocottus globiceps	United States	Oregon	Lincoln County	Tidepool	44.4972	0
OS Fishes:8873	Clinocottus globiceps	United States	Oregon		Tidepool	43.961	0
UAM_2942	Clinocottus globiceps	USA	AK	Sitka, Japonski Island	Tidepool	57.056	0
UAM_2968	Clinocottus globiceps	USA	WA	Neah Bay	Tidepool	48.3721	0
UAM_2975	Clinocottus globiceps	USA	OR	Newport, Boiler Bay	Tidepool	44.8299	0
UAM_4681	Clinocottus globiceps	Canada	BC	Ucluelet, Wya Point	Tidepool	48.962	0
UAM_4685	Clinocottus globiceps	Canada	BC	Ucluelet, Wya Point	Tidepool	48.962	0
UAM_4691	Clinocottus globiceps	Canada	BC	Ucluelet, Wya Point	Tidepool	48.962	0
UBC 900116	Clinocottus globiceps	Canada			Tidepool	48.8507	0
UBC 900123	Clinocottus globiceps	Canada			Tidepool	48.8507	0
UBC 900107	Clinocottus globiceps	Canada			Tidepool	48.8507	0
UBC 900077	Clinocottus globiceps	Canada			Tidepool	48.8507	0
UBC 900078	Clinocottus globiceps	Canada			Tidepool	48.8507	0
UBC 900185	Clinocottus globiceps	Canada			Tidepool	48.8507	0
UBC 900111	Clinocottus globiceps	Canada			Tidepool	48.8507	0
UBC 900093	Clinocottus globiceps	Canada			Tidepool	48.8507	0
UBC 900061	Clinocottus globiceps	Canada			Tidepool	48.8507	0
UBC 900179	Clinocottus globiceps	Canada			Tidepool	48.8507	0
UBC 900094	Clinocottus globiceps	Canada			Tidepool	48.8507	0
UBC 900090	Clinocottus globiceps	Canada			Tidepool	48.8507	0
UBC 900064	Clinocottus globiceps	Canada			Tidepool	48.8507	0
UBC 900075	Clinocottus globiceps	Canada			Tidepool	48.8507	0
UBC 900134	Clinocottus globiceps	Canada			Tidepool	48.8507	0
UBC 900129	Clinocottus globiceps	Canada			Tidepool	48.8507	0
UBC 900128	Clinocottus globiceps	Canada			Tidepool	48.8507	0
UBC 900127	Clinocottus globiceps	Canada			Tidepool	48.8507	0
UBC 900152	Clinocottus globiceps	Canada			Tidepool	48.8507	0
UBC 900071	Clinocottus globiceps	Canada			Tidepool	48.8507	0
UBC 900104	Clinocottus globiceps	Canada			Tidepool	48.8507	0
UBC 900177	Clinocottus globiceps	Canada			Tidepool	48.8507	0
UBC 900088	Clinocottus globiceps	Canada			Tidepool	48.8507	0
UBC 900070	Clinocottus globiceps	Canada			Tidepool	48.8507	0
UBC 900106	Clinocottus globiceps	Canada			Tidepool	48.8507	0
UBC 900063	Clinocottus globiceps	Canada			Tidepool	48.8507	0
UBC 900081	Clinocottus globiceps	Canada			Tidepool	48.8507	0
UBC 900114	Clinocottus globiceps	Canada			Tidepool	48.8507	0
UBC 900146	Clinocottus globiceps	Canada			Tidepool	48.8507	0
UBC 900062	Clinocottus globiceps	Canada			Tidepool	48.8507	0
UBC 900097	Clinocottus globiceps	Canada			Tidepool	48.8507	0
UBC 900055	Clinocottus globiceps	Canada			Tidepool	48.8507	0
UBC 900176	Clinocottus globiceps	Canada			Tidepool	48.8507	0
UBC 900188	Clinocottus globiceps	Canada			Tidepool	48.8507	0
UBC 900089	Clinocottus globiceps	Canada			Tidepool	48.8507	0
UBC 900057	Clinocottus globiceps	Canada			Tidepool	48.8507	0
UBC 900187	Clinocottus globiceps	Canada			Tidepool	48.8507	0
UBC 900117	Clinocottus globiceps	Canada			Tidepool	48.8507	0
UBC 900074	Clinocottus globiceps	Canada			Tidepool	48.8507	0
UBC 900060	Clinocottus globiceps	Canada			Tidepool	48.8507	0
UBC 900167	Clinocottus globiceps	Canada			Tidepool	48.8507	0
UBC 900047	Clinocottus globiceps	Canada			Tidepool	48.8507	0
UBC 900008	Clinocottus globiceps	Canada			Tidepool	48.8507	0
UBC 900046	Clinocottus globiceps	Canada			Tidepool	48.8507	0
UBC 900021	Clinocottus globiceps	Canada			Tidepool	48.8507	0
UBC 900013	Clinocottus globiceps	Canada			Tidepool	48.8507	0
UBC 900006	Clinocottus globiceps	Canada			Tidepool	48.8507	0
UBC 900035	Clinocottus globiceps	Canada			Tidepool	48.8507	0
UBC 900049	Clinocottus globiceps	Canada			Tidepool	48.8507	0
UBC 900031	Clinocottus globiceps	Canada			Tidepool	48.8507	0
UBC 900024	Clinocottus globiceps	Canada			Tidepool	48.8507	0
UBC 630165	Clinocottus globiceps	United States (c			Tidepool	56.9974	0
UBC 650578	Clinocottus globiceps	United States (c			Tidepool	54.8014	0
UBC 650514	Clinocottus globiceps	United States (c			Tidepool	55.7794	0
UBC 650575	Clinocottus globiceps	United States (c			Tidepool	57.4114	0
UBC 630333	Clinocottus globiceps (as Oligocottus globiceps)	United States (c			Tidepool	54.7875	0
UMMZ FISH:64448	Clinocottus globiceps	USA	California	San Mateo	Tidepool	37.327	0
UMMZ FISH:64449	Clinocottus globiceps	USA	California	San Mateo	Tidepool	37.4988	0
UMMZ FISH:186561	Clinocottus globiceps	USA	California	San Mateo	Tidepool	37.4988	0
UMMZ FISH:66084	Clinocottus globiceps	USA	California	Del Norte	Tidepool	41.7558	0
UMMZ FISH:66090	Clinocottus globiceps	USA	California	Marin	Tidepool	37.9094	0
UMMZ FISH:93004	Clinocottus globiceps	USA	Washington	Clallam	Tidepool	47.9081	0
UMMZ FISH:93009	Clinocottus globiceps	USA	Washington	Clallam	Tidepool	47.9081	0
UMMZ FISH:93013	Clinocottus globiceps	USA	Washington		Tidepool	47.2362	0
UMMZ FISH:93014	Clinocottus globiceps	USA	Washington		Tidepool	47.3556	0
UMMZ FISH:93015	Clinocottus globiceps	USA	Washington		Tidepool	47.2362	0
UMMZ FISH:93027	Clinocottus globiceps	USA	Oregon	Tillamook	Tidepool	45.9415	0
UMMZ FISH:93028	Clinocottus globiceps	USA	Oregon	Tillamook	Tidepool	45.9415	0
UMMZ FISH:93029	Clinocottus globiceps	USA	Oregon	Tillamook	Tidepool	45.9415	0
UMMZ FISH:93041	Clinocottus globiceps	USA	Oregon		Tidepool	43.3063	0
UMMZ FISH:93044	Clinocottus globiceps	USA	Oregon	Coos	Tidepool	43.3063	0
UW 151650	Clinocottus globiceps	CANADA	BRITISH COLUMBIA		Tidepool	49.12	0
UW 2962	Clinocottus globiceps	USA	WASHINGTON	CLALLAM	Tidepool	48.3681	0
UW 22441	Clinocottus globiceps	USA	WASHINGTON	CLALLAM	Tidepool	48.2628	0
UW 937	Clinocottus globiceps	USA	OREGON	COOS	Tidepool	43.3063	0
UW 1024	Clinocottus globiceps	USA	WASHINGTON	SAN JUAN	Tidepool	48.5514	0
UW 892	Clinocottus globiceps	USA	OREGON	COOS	Tidepool	43.3063	0
UW 1458	Clinocottus globiceps	USA	WASHINGTON	CLALLAM	Tidepool	47.9667	0
LACM Fish:31860.004	Clinocottus globiceps	United States	California	San Luis Obispo		35.2162	0
LACM Fish:52243.003	Clinocottus globiceps	United States	California	San Luis Obispo		35.6401	0
LACM Fish:52626.003	Clinocottus globiceps	United States	California			34.41	0
CAS 29821	Clinocottus globiceps	United States	California	Sonoma		38.505	0.3048
CAS 25154	Clinocottus globiceps	United States	California	Humboldt		41.0544	0.4572
CAS 25064	Clinocottus globiceps	United States	California	Humboldt		41.0558	0.4572
CAS 27805	Clinocottus globiceps	United States	California	Mendocino		38.9089	0.4572
CAS 25070	Clinocottus globiceps	United States	California	Del Norte		41.9901	0.57912
CAS 25105	Clinocottus globiceps	United States	California	Del Norte		41.7711	0.6096
CAS 25090	Clinocottus globiceps	United States	California	Del Norte		41.7702	0.6096
CAS 25175	Clinocottus globiceps	United States	California	Del Norte		41.9894	0.6096
UMMZ FISH:93019	Clinocottus globiceps	USA	Oregon	Clatsop		45.9415	0.6096
UMMZ FISH:93043	Clinocottus globiceps	USA	Oregon	Coos		43.3063	0.6096
CAS 29680	Clinocottus globiceps	United States	California	Humboldt		40.0225	0.9144
CAS 29691	Clinocottus globiceps	United States	California	Humboldt		40.0211	0.9144
CAS 29493	Clinocottus globiceps	United States	California	Mendocino		39.3186	0.9144
CAS 29525	Clinocottus globiceps	United States	California	Mendocino		39.6578	0.9144
SU 49541	Clinocottus globiceps	United States	California	San Mateo		37.5274	0.9144
SIO 61-12	Clinocottus globiceps	United States	California			37.5667	0.9144
SIO 67-297	Clinocottus globiceps	United States	California			35.3333	0.9144
OS Fishes:3246	Clinocottus globiceps	United States	Oregon	Lincoln County		44.6737	1
CAS 29331	Clinocottus globiceps	United States	California	Mendocino		39.6278	1.6764
OS Fishes:9176	Clinocottus globiceps	United States	Oregon	Lane County		44.2697	2
SIO 45-52	Clinocottus recalvus	United States	California		Tidepool	36.1833	0
SIO 47-89	Clinocottus recalvus	United States	California		Tidepool	34.06	0
SIO 47-201C	Clinocottus recalvus	Mexico	Baja California		Tidepool	31.55	0
SIO 47-90	Clinocottus recalvus	United States	California		Tidepool	34.06	0
SIO 50-282	Clinocottus recalvus	Mexico	Baja California		Tidepool	31.4667	0
SIO 47-88	Clinocottus recalvus	United States	California		Tidepool	34.06	0
SIO 47-77	Clinocottus recalvus	United States	California		Tidepool	34.0567	0
SIO 45-215C	Clinocottus recalvus	Mexico	Baja California		Tidepool	31.54	0
SIO 45-16A	Clinocottus recalvus	Mexico	Baja California		Tidepool	32.1867	0
SIO 47-93	Clinocottus recalvus	United States	California		Tidepool	33.9183	0
SIO 47-204	Clinocottus recalvus	Mexico	Baja California		Tidepool	31.55	0
SIO 45-219A	Clinocottus recalvus	Mexico	Baja California		Tidepool	31.545	0
SIO 47-8	Clinocottus recalvus	Mexico	Baja California		Tidepool	32.42	0
SIO 45-55	Clinocottus recalvus	United States	California		Tidepool	36.4467	0
SIO 46-117	Clinocottus recalvus	Mexico	Baja California		Tidepool	32.5	0
LACM Fish:51789.006	Clinocottus recalvus	United States	California	San Luis Obispo	Tidepool	35.636	0
LACM Fish:47819.001	Clinocottus recalvus	United States	California	Ventura	Tidepool	33.22	0
LACM Fish:47754.003	Clinocottus recalvus	United States	California	Santa Barbara	Tidepool	34.4672	0
LACM Fish:48833.001	Clinocottus recalvus	United States	California	San Luis Obispo	Tidepool	34.2736	0
CAS 216371	Clinocottus recalvus	United States	California		Tidepool	36.6295	0
CAS 216377	Clinocottus recalvus	United States	California		Tidepool	33.9624	0
CAS 216397	Clinocottus recalvus	United States	California		Tidepool	34.0044	0
CAS 216387	Clinocottus recalvus	United States	California	Los Angeles	Tidepool	33.7368	0
SU 39774	Clinocottus recalvus	United States	California	Los Angeles	Tidepool	33.9889	0
CAS 28125	Clinocottus recalvus	United States	California	Mendocino	Tidepool	39.6624	0
CAS 28220	Clinocottus recalvus	United States	California	Mendocino	Tidepool	39.3145	0
CAS 28611	Clinocottus recalvus	United States	California	Mendocino	Tidepool	38.7781	0
CAS 41714	Clinocottus recalvus	United States	California	Monterey	Tidepool	36.4483	0
CAS 216381	Clinocottus recalvus	United States	California	Monterey	Tidepool	36.4483	0
CAS 216382	Clinocottus recalvus	United States	California	Monterey	Tidepool	36.4483	0
SU 35324	Clinocottus recalvus	United States	California	San Luis Obispo	Tidepool	35.7011	0
CAS 18936	Clinocottus recalvus	United States	California	San Mateo	Tidepool	37.5274	0
CAS 216374	Clinocottus recalvus	United States	California	San Mateo	Tidepool	37.5274	0
CAS 216380	Clinocottus recalvus	United States	California	San Mateo	Tidepool	37.5274	0
CAS 216394	Clinocottus recalvus	United States	California	San Mateo	Tidepool	37.5274	0
SU 24644	Clinocottus recalvus	United States	California	San Mateo	Tidepool	37.5274	0
CAS 27370	Clinocottus recalvus	United States	California	Sonoma	Tidepool	38.2614	0
CAS 28297	Clinocottus recalvus	United States	California	Sonoma	Tidepool	38.5649	0
CAS 31100	Clinocottus recalvus	United States	California	Ventura	Tidepool	34.0065	0
CAS 18912	Clinocottus recalvus	United States	California	San Mateo	Tidepool	37.5274	0
CAS 216368	Clinocottus recalvus	United States	California	San Mateo	Tidepool	37.5274	0
CAS 216372	Clinocottus recalvus	United States	California	San Mateo	Tidepool	37.5274	0
CAS 216373	Clinocottus recalvus	United States	California	San Mateo	Tidepool	37.5274	0
CAS 216391	Clinocottus recalvus	United States	California	San Mateo	Tidepool	37.5274	0
SU 24678	Clinocottus recalvus	United States	California	Monterey	Tidepool	36.6295	0
LACM Fish:4289	Clinocottus recalvus	Mexico	Baja California		Tidepool	31.5333	0
LACM Fish:4346	Clinocottus recalvus	United States	California		Tidepool	37.7318	0
LACM Fish:32054.002	Clinocottus recalvus	Mexico	Baja California		Tidepool	27.7	0
LACM Fish:52278.014	Clinocottus recalvus	United States	California	San Luis Obispo	Tidepool	35.6522	0
LACM Fish:38400.001	Clinocottus recalvus	United States	California	Santa Barbara	Tidepool	34.4333	0
LACM Fish:38402.002	Clinocottus recalvus	United States	California	San Luis Obispo	Tidepool	35.65	0
LACM Fish:51948.001	Clinocottus recalvus	United States	California		Tidepool	34.0488	0
LACM Fish:39975.007	Clinocottus recalvus	United States	California	San Luis Obispo	Tidepool	35.6289	0
UBC 730095	Clinocottus recalvus	United States (c	California	Monterey	Tidepool	36.5552	0
UMMZ FISH:64446	Clinocottus recalvus	USA	California	San Mateo	Tidepool	37.5274	0
UMMZ FISH:130657	Clinocottus recalvus	USA	California	Monterey	Tidepool	36.5552	0
UMMZ FISH:132102	Clinocottus recalvus	USA	California		Tidepool	34.0232	0
UMMZ FISH:141274	Clinocottus recalvus	USA	California		Tidepool	33.7361	0
UMMZ FISH:142399	Clinocottus recalvus	USA	California	Monterey	Tidepool	37.2167	0
UMMZ FISH:176324	Clinocottus recalvus	USA	California	San Luis Obispo	Tidepool	35.644	0
UMMZ FISH:186563	Clinocottus recalvus	USA	California	San Mateo	Tidepool	37.5274	0
UMMZ FISH:66061	Clinocottus recalvus	USA	California	Monterey	Tidepool	36.5419	0
UMMZ FISH:141180	Clinocottus recalvus	USA	California	San Luis Obispo	Tidepool	35.4428	0
LACM Fish:9950.033	Clinocottus recalvus	United States	California	San Luis Obispo		35.636	0
LACM Fish:31860.005	Clinocottus recalvus	United States	California	San Luis Obispo		35.2162	0
LACM Fish:47773.001	Clinocottus recalvus	United States	California	Santa Barbara		34.0028	0
LACM Fish:48835.001	Clinocottus recalvus	United States	California	San Luis Obispo		35.6489	0
LACM Fish:49896.003	Clinocottus recalvus	United States	California	San Luis Obispo		35.6356	0
LACM Fish:49900.003	Clinocottus recalvus	United States	California	San Luis Obispo		35.6505	0
LACM Fish:51485.001	Clinocottus recalvus	United States	California	San Luis Obispo		35.6289	0
LACM Fish:52219.006	Clinocottus recalvus	United States	California	San Luis Obispo		35.6511	0
LACM Fish:52244.008	Clinocottus recalvus	United States	California	San Luis Obispo		35.6505	0
LACM Fish:54012.003	Clinocottus recalvus	United States	California			34.445	0
CAS 47058	Clinocottus recalvus	United States	California			37.6987	0
SU 16014	Clinocottus recalvus	United States	California	Monterey		36.6295	0
SIO 72-91	Clinocottus recalvus	United States	California			35.65	0.0762
SIO 72-102	Clinocottus recalvus	United States	California			34.5833	0.1524
SIO 80-21	Clinocottus recalvus	United States	California			35.6667	0.3048
SIO 45-201B	Clinocottus recalvus	Mexico	Baja California			32.2633	0.381
SIO 47-202	Clinocottus recalvus	Mexico	Baja California			31.55	0.4572
SIO 47-77B	Clinocottus recalvus	United States	California			34.0567	0.508
SIO 48-315	Clinocottus recalvus	Mexico	Baja California			32.2633	0.6096
SIO 45-203	Clinocottus recalvus	Mexico	Baja California			32.2767	0.762
CAS 29692	Clinocottus recalvus	United States	California	Humboldt		40.0211	0.9144
CAS 29494	Clinocottus recalvus	United States	California	Mendocino		39.3186	0.9144
CAS 29526	Clinocottus recalvus	United States	California	Mendocino		39.6578	0.9144
SIO 61-12	Clinocottus recalvus	United States	California			37.5667	0.9144
SIO 69-30	Clinocottus recalvus	United States	California			34.0167	0.9144
SIO 51-23	Clinocottus recalvus	Mexico	Baja California			31.715	0.9144
SIO 45-20	Clinocottus recalvus	Mexico	Baja California			32.2617	0.9144
SIO 45-219B	Clinocottus recalvus	Mexico	Baja California			31.545	0.9144
SIO 72-89	Clinocottus recalvus	United States	California			35.65	0.9144
SIO 09-301	Clinocottus recalvus	United States	California			37.6989	1
SIO 48-308	Clinocottus recalvus	Mexico	Baja California			32.1867	1.0668
SIO 73-216	Clinocottus recalvus	United States	California			35.6667	1.0668
SU 48910	Clinocottus recalvus	United States	California	San Luis Obispo		35.6625	1.2192
SIO 46-58	Clinocottus recalvus	Mexico	Baja California			31.255	1.2192
SIO 45-215A	Clinocottus recalvus	Mexico	Baja California			31.54	1.2192
CAS 29332	Clinocottus recalvus	United States	California	Mendocino		39.6278	1.6764
CAS 216406	Clinocottus recalvus	United States	California	Mendocino		39.6278	1.6764
LACM Fish:48129.001	Clinocottus recalvus	United States	California	Santa Barbara		34.5536	2.1336
SIO 67-151	Clinocottus recalvus	United States	California			35.65	3.6576
SIO 51-249	Clinocottus recalvus	United States	California			34.025	7.62
SIO 51-239	Clinocottus recalvus	United States	California			34.0333	9.144
SIO 54-191	Clinocottus recalvus	United States	California			34.0583	10.668
SIO 47-96	Clinocottus recalvus	United States	California			34.0117	33.8328
LACM Fish:35939.001	Leiocottus hirundo	United States	California	Los Angeles		33.445	0
LACM Fish:50269.001	Leiocottus hirundo	United States	California	Los Angeles		34.0452	0
CAS 31063	Leiocottus hirundo	United States	California	Orange		33.6	3.048
SIO 54-188	Leiocottus hirundo	United States	California			34.0167	4.572
SIO 51-234	Leiocottus hirundo	United States	California			33.4483	4.572
LACM Fish:50134.001	Leiocottus hirundo	United States	California	Los Angeles		33.4681	4.6
SIO 71-62	Leiocottus hirundo	United States	California			33.3833	6.096
SIO 51-259	Leiocottus hirundo	United States	California			34.0567	6.096
SIO 84-45	Leiocottus hirundo	United States	California			32.9	7.62
SIO 58-461	Leiocottus hirundo	United States	California			32.6	7.62
SIO 69-499	Leiocottus hirundo	United States	California			33.3833	7.62
LACM Fish:51375.001	Leiocottus hirundo	United States	California	Los Angeles		34.0173	9.1
SIO 47-22	Leiocottus hirundo	United States	California			33.037	9.144
SIO 58-107	Leiocottus hirundo	United States	California			33.25	10.668
SIO 59-307	Leiocottus hirundo	Mexico	Baja California			31.8	10.668
LACM Fish:48872.002	Leiocottus hirundo	Mexico	Baja California			32.4058	11
SIO 45-34	Leiocottus hirundo	United States	California			32.85	12.192
CAS 47382	Leiocottus hirundo	United States	California	Santa Barbara		34.4475	13.716
SIO 55-74	Leiocottus hirundo	United States	California			32.9	15.24
SIO 67-272	Leiocottus hirundo	United States	California			33.3833	16.764
LACM Fish:6932.001	Leiocottus hirundo	United States	California			34.0067	17
SIO 49-151	Leiocottus hirundo	Mexico	Baja California			32.5	21.9456
LACM Fish:48279.001	Leiocottus hirundo	United States	California	Santa Barbara		33.8958	22
SIO 45-226	Leiocottus hirundo	United States	California			32.85	22.86
SIO 48-218	Leiocottus hirundo	Mexico	Baja California			32.4117	23.7744
LACM Fish:35685.007	Leiocottus hirundo	United States	California			32.8191	24.4
SIO 63-198	Leiocottus hirundo	United States	California			32.4433	25.908
SIO 47-195	Leiocottus hirundo	United States	California			32.9	36.576
UW 151647	Oligocottus maculosus	CANADA	BRITISH COLUMBIA		Tidepool	51.25	0
UW 151651	Oligocottus maculosus	CANADA	BRITISH COLUMBIA		Tidepool	49.12	0
UW 151652	Oligocottus maculosus	CANADA	BRITISH COLUMBIA		Tidepool	48.94	0
UW 151657	Oligocottus maculosus	USA	ALASKA		Tidepool	57.8212	0
LACM Fish:8958.001	Oligocottus maculosus	United States	Oregon	Curry	Tidepool	42.0498	0
LACM Fish:31972.006	Oligocottus maculosus	United States	California	Mendocino	Tidepool	39.4252	0
UW 169	Oligocottus maculosus	USA	WASHINGTON	SKAGIT	Tidepool	48.5126	0
UW 1262	Oligocottus maculosus	USA	WASHINGTON	SAN JUAN	Tidepool	48.5514	0
UW 2964	Oligocottus maculosus	USA	WASHINGTON	CLALLAM	Tidepool	48.3681	0
UW 638	Oligocottus maculosus	USA	WASHINGTON	KITSAP	Tidepool	47.5559	0
CAS 29706	Oligocottus maculosus	United States	California	Humboldt	Tidepool	40.0211	0
UW 1060	Oligocottus maculosus	USA	WASHINGTON	SAN JUAN	Tidepool	48.5514	0
UW 3023	Oligocottus maculosus	USA	WASHINGTON	CLALLAM	Tidepool	47.9667	0
CAS 29803	Oligocottus maculosus	United States	California	Humboldt	Tidepool	40.0211	0
CAS 29263	Oligocottus maculosus	United States	California	Humboldt	Tidepool	40.13	0
UW 22436	Oligocottus maculosus	USA	WASHINGTON	CLALLAM	Tidepool	48.2628	0
UW 1143	Oligocottus maculosus	USA	WASHINGTON	SAN JUAN	Tidepool	48.5514	0
CAS 25122	Oligocottus maculosus	United States	California	Del Norte	Tidepool	41.7856	0
CAS 25166	Oligocottus maculosus	United States	California	Del Norte	Tidepool	41.7856	0
CAS 25134	Oligocottus maculosus	United States	California	Del Norte	Tidepool	41.7856	0
CAS 88404	Oligocottus maculosus	United States	California	Los Angeles	Tidepool	33.2167	0
SU 3396	Oligocottus maculosus	United States	Washington	Clallam	Tidepool	48.3689	0
SU 19024	Oligocottus maculosus	United States	Alaska		Tidepool	58.271	0
SU 14685	Oligocottus maculosus	United States	Alaska	Prince of Wales-Hyder	Tidepool	56.0676	0
CAS 212684	Oligocottus maculosus	United States	California		Tidepool	37.15	0
CAS 212710	Oligocottus maculosus	United States	California		Tidepool	37.2364	0
CAS 20064	Oligocottus maculosus	United States	California	Humboldt	Tidepool	40.0206	0
CAS 28628	Oligocottus maculosus	United States	California	Humboldt	Tidepool	40.13	0
CAS 28646	Oligocottus maculosus	United States	California	Humboldt	Tidepool	40.1389	0
CAS 29785	Oligocottus maculosus	United States	California	Humboldt	Tidepool	40.0211	0
CAS 212699	Oligocottus maculosus	United States	California	Marin	Tidepool	37.8911	0
CAS 234383	Oligocottus maculosus	United States	California	Marin	Tidepool	37.8911	0
SU 35341	Oligocottus maculosus	United States	California	Marin	Tidepool	37.8911	0
CAS 19106	Oligocottus maculosus	United States	California	Mendocino	Tidepool	38.8012	0
CAS 28144	Oligocottus maculosus	United States	California	Mendocino	Tidepool	39.13	0
CAS 28223	Oligocottus maculosus	United States	California	Mendocino	Tidepool	39.3145	0
CAS 28613	Oligocottus maculosus	United States	California	Mendocino	Tidepool	38.7781	0
CAS 28826	Oligocottus maculosus	United States	California	Mendocino	Tidepool	38.9167	0
CAS 18886	Oligocottus maculosus	United States	California	San Mateo	Tidepool	37.5274	0
CAS 212691	Oligocottus maculosus	United States	California	San Mateo	Tidepool	37.5274	0
CAS 212696	Oligocottus maculosus	United States	California	San Mateo	Tidepool	37.5042	0
SU 24653	Oligocottus maculosus	United States	California	San Mateo	Tidepool	37.5274	0
CAS 27373	Oligocottus maculosus	United States	California	Sonoma	Tidepool	38.2614	0
CAS 28303	Oligocottus maculosus	United States	California	Sonoma	Tidepool	38.5649	0
CAS 29838	Oligocottus maculosus	United States	California	Sonoma	Tidepool	38.5964	0
CAS 59339	Oligocottus maculosus	United States	California	Sonoma	Tidepool	38.5649	0
CAS 234384	Oligocottus maculosus	United States	California	Sonoma	Tidepool	38.3287	0
CAS 18832	Oligocottus maculosus	United States	California		Tidepool	37.5274	0
CAS 18827	Oligocottus maculosus	United States	California	San Mateo	Tidepool	37.5274	0
CAS 18830	Oligocottus maculosus	United States	California	San Mateo	Tidepool	37.5274	0
CAS 18833	Oligocottus maculosus	United States	California	San Mateo	Tidepool	37.5274	0
CAS 18843	Oligocottus maculosus	United States	California	San Mateo	Tidepool	37.5274	0
CAS 18862	Oligocottus maculosus	United States	California	San Mateo	Tidepool	37.5274	0
CAS 18901	Oligocottus maculosus	United States	California	San Mateo	Tidepool	37.5274	0
CAS 18954	Oligocottus maculosus	United States	California	San Mateo	Tidepool	37.5274	0
CAS 212682	Oligocottus maculosus	United States	California	San Mateo	Tidepool	37.5274	0
CAS 212686	Oligocottus maculosus	United States	California	San Mateo	Tidepool	37.5274	0
CAS 212697	Oligocottus maculosus	United States	California	San Mateo	Tidepool	37.5274	0
CAS 212702	Oligocottus maculosus	United States	California	San Mateo	Tidepool	37.5274	0
CAS 212703	Oligocottus maculosus	United States	California	San Mateo	Tidepool	37.5274	0
CAS 212705	Oligocottus maculosus	United States	California	San Mateo	Tidepool	37.5274	0
CAS 212708	Oligocottus maculosus	United States	California	San Mateo	Tidepool	37.5274	0
CAS 212716	Oligocottus maculosus	United States	California	San Mateo	Tidepool	37.5274	0
CAS 212717	Oligocottus maculosus	United States	California	San Mateo	Tidepool	37.5274	0
CAS 216533	Oligocottus maculosus	United States	California	San Mateo	Tidepool	37.5274	0
CAS 234390	Oligocottus maculosus	United States	California	San Mateo	Tidepool	37.5274	0
LACM Fish:4363	Oligocottus maculosus	United States	California	San Mateo	Tidepool	37.5114	0
LACM Fish:4364	Oligocottus maculosus	United States	California	San Mateo	Tidepool	37.5114	0
LACM Fish:4365	Oligocottus maculosus	United States	California	San Mateo	Tidepool	37.5114	0
LACM Fish:4312	Oligocottus maculosus	United States	Washington	Skagit	Tidepool	48.4192	0
LACM Fish:33708.007	Oligocottus maculosus	United States	California		Tidepool	38.9381	0
LACM Fish:34323.004	Oligocottus maculosus	United States	Alaska		Tidepool	56.3409	0
LACM Fish:36007.001	Oligocottus maculosus	United States	California	Santa Cruz	Tidepool	37.0105	0
LACM Fish:38403.001	Oligocottus maculosus	United States	California	Sonoma	Tidepool	38.6667	0
LACM Fish:38404.002	Oligocottus maculosus	United States	California	Sonoma	Tidepool	38.295	0
OS Fishes:287	Oligocottus maculosus	United States	Oregon	Lincoln County	Tidepool	44.6737	0
OS Fishes:3206	Oligocottus maculosus	United States	Oregon	Curry County	Tidepool	42.0526	0
OS Fishes:6529	Oligocottus maculosus	United States	Oregon	Lincoln County	Tidepool	44.6737	0
OS Fishes:7067	Oligocottus maculosus	United States	Alaska	Kodiak Island Borough	Tidepool	57.2	0
OS Fishes:8872	Oligocottus maculosus	United States	Oregon		Tidepool	44.3112	0
SIO 93-165	Oligocottus maculosus	United States	Alaska		Tidepool	57.75	0
UAM 6250	Oligocottus maculosus	USA	AK	Mission Beach, Kodiak Island, AK	Tidepool	57.7992	0
UAM 6259	Oligocottus maculosus	USA	AK	Mill Bay, Kodiak Isaland, AK	Tidepool	57.8212	0
UAM_2952	Oligocottus maculosus	USA	AK	Sitka, Halibut Point Rd.	Tidepool	57.0904	0
UAM_2959	Oligocottus maculosus	USA	AK	Sitka, Sawmill Cr. Rd. Island	Tidepool	57.044	0
UAM_2963	Oligocottus maculosus	USA	AK	Sitka, Japonski Island	Tidepool	57.056	0
UAM_4696	Oligocottus maculosus	USA	AK	Kodiak, Chiniak	Tidepool	57.6194	0
UAM_2944	Oligocottus maculosus	USA	AK	Sitka, Japonski Island	Tidepool	57.056	0
UAM_2971	Oligocottus maculosus	USA	WA	Sekiu	Tidepool	48.268	0
UAM_2969	Oligocottus maculosus	USA	WA	Neah Bay	Tidepool	48.3721	0
UAM_2977	Oligocottus maculosus	USA	OR	Newport, Boiler Bay	Tidepool	44.8299	0
UAM_4682	Oligocottus maculosus	Canada	BC	Ucluelet, Wya Point	Tidepool	48.962	0
UAM_4686	Oligocottus maculosus	Canada	BC	Ucluelet, Wya Point	Tidepool	48.962	0
UAM_4692	Oligocottus maculosus	Canada	BC	Ucluelet, Wya Point	Tidepool	48.962	0
UAM 6162	Oligocottus maculosus	USA	AK	Kasitsna Bay	Tidepool	59.4681	0
UAM 6166	Oligocottus maculosus	USA	AK	Kasitsna Bay	Tidepool	59.4681	0
UAM 6169	Oligocottus maculosus	USA	AK	Kasitsna Bay	Tidepool	59.4681	0
UAM 6170	Oligocottus maculosus	USA	AK	Kasitsna Bay	Tidepool	59.4681	0
UBC 600450	Oligocottus maculosus	Canada			Tidepool	53.4318	0
UBC 900174	Oligocottus maculosus	Canada			Tidepool	48.8507	0
UBC 900082	Oligocottus maculosus	Canada			Tidepool	48.8507	0
UBC 900126	Oligocottus maculosus	Canada			Tidepool	48.8507	0
UBC 900105	Oligocottus maculosus	Canada			Tidepool	48.8507	0
UBC 900124	Oligocottus maculosus	Canada			Tidepool	48.8507	0
UBC 900116	Oligocottus maculosus	Canada			Tidepool	48.8507	0
UBC 900053	Oligocottus maculosus	Canada			Tidepool	48.8507	0
UBC 900123	Oligocottus maculosus	Canada			Tidepool	48.8507	0
UBC 900107	Oligocottus maculosus	Canada			Tidepool	48.8507	0
UBC 900077	Oligocottus maculosus	Canada			Tidepool	48.8507	0
UBC 900078	Oligocottus maculosus	Canada			Tidepool	48.8507	0
UBC 900185	Oligocottus maculosus	Canada			Tidepool	48.8507	0
UBC 900111	Oligocottus maculosus	Canada			Tidepool	48.8507	0
UBC 900093	Oligocottus maculosus	Canada			Tidepool	48.8507	0
UBC 900119	Oligocottus maculosus	Canada			Tidepool	48.8507	0
UBC 900181	Oligocottus maculosus	Canada			Tidepool	48.8507	0
UBC 900108	Oligocottus maculosus	Canada			Tidepool	48.8507	0
UBC 900090	Oligocottus maculosus	Canada			Tidepool	48.8507	0
UBC 900064	Oligocottus maculosus	Canada			Tidepool	48.8507	0
UBC 900075	Oligocottus maculosus	Canada			Tidepool	48.8507	0
UBC 900147	Oligocottus maculosus	Canada			Tidepool	48.8507	0
UBC 900079	Oligocottus maculosus	Canada			Tidepool	48.8507	0
UBC 900134	Oligocottus maculosus	Canada			Tidepool	48.8507	0
UBC 900129	Oligocottus maculosus	Canada			Tidepool	48.8507	0
UBC 900128	Oligocottus maculosus	Canada			Tidepool	48.8507	0
UBC 900127	Oligocottus maculosus	Canada			Tidepool	48.8507	0
UBC 900076	Oligocottus maculosus	Canada			Tidepool	48.8507	0
UBC 900152	Oligocottus maculosus	Canada			Tidepool	48.8507	0
UBC 900071	Oligocottus maculosus	Canada			Tidepool	48.8507	0
UBC 900104	Oligocottus maculosus	Canada			Tidepool	48.8507	0
UBC 900070	Oligocottus maculosus	Canada			Tidepool	48.8507	0
UBC 900106	Oligocottus maculosus	Canada			Tidepool	48.8507	0
UBC 900063	Oligocottus maculosus	Canada			Tidepool	48.8507	0
UBC 900171	Oligocottus maculosus	Canada			Tidepool	48.8507	0
UBC 900114	Oligocottus maculosus	Canada			Tidepool	48.8507	0
UBC 900097	Oligocottus maculosus	Canada			Tidepool	48.8507	0
UBC 900055	Oligocottus maculosus	Canada			Tidepool	48.8507	0
UBC 900176	Oligocottus maculosus	Canada			Tidepool	48.8507	0
UBC 900098	Oligocottus maculosus	Canada			Tidepool	48.8507	0
UBC 900188	Oligocottus maculosus	Canada			Tidepool	48.8507	0
UBC 900087	Oligocottus maculosus	Canada			Tidepool	48.8507	0
UBC 900187	Oligocottus maculosus	Canada			Tidepool	48.8507	0
UBC 900083	Oligocottus maculosus	Canada			Tidepool	48.8507	0
UBC 900074	Oligocottus maculosus	Canada			Tidepool	48.8507	0
UBC 900045	Oligocottus maculosus	Canada			Tidepool	48.8507	0
UBC 900041	Oligocottus maculosus	Canada			Tidepool	48.8507	0
UBC 900047	Oligocottus maculosus	Canada			Tidepool	48.8507	0
UBC 900008	Oligocottus maculosus	Canada			Tidepool	48.8507	0
UBC 900046	Oligocottus maculosus	Canada			Tidepool	48.8507	0
UBC 900021	Oligocottus maculosus	Canada			Tidepool	48.8507	0
UBC 900013	Oligocottus maculosus	Canada			Tidepool	48.8507	0
UBC 900006	Oligocottus maculosus	Canada			Tidepool	48.8507	0
UBC 900035	Oligocottus maculosus	Canada			Tidepool	48.8507	0
UBC 900031	Oligocottus maculosus	Canada			Tidepool	48.8507	0
UBC 900009	Oligocottus maculosus	Canada			Tidepool	48.8507	0
UBC 900024	Oligocottus maculosus	Canada			Tidepool	48.8507	0
UBC 900011	Oligocottus maculosus	Canada			Tidepool	48.8507	0
UBC 630454	Oligocottus maculosus	Canada			Tidepool	48.782	0
UBC 590113	Oligocottus maculosus	Canada			Tidepool	48.782	0
UBC 590113	Oligocottus maculosus	Canada			Tidepool	48.782	0
UBC 590111	Oligocottus maculosus	Canada			Tidepool	48.782	0
UBC 590112	Oligocottus maculosus	Canada			Tidepool	48.782	0
UBC 590110	Oligocottus maculosus	Canada			Tidepool	48.782	0
UBC 620878	Oligocottus maculosus	Canada			Tidepool	48.4307	0
UBC 580443	Oligocottus maculosus	Canada			Tidepool	49.3017	0
UBC 580448	Oligocottus maculosus	Canada			Tidepool	49.3017	0
UBC 620854	Oligocottus maculosus	Canada			Tidepool	48.4284	0
UBC 620638	Oligocottus maculosus	Canada			Tidepool	48.4284	0
UBC 650531	Oligocottus maculosus	United States (c			Tidepool	56.9974	0
UBC 650530	Oligocottus maculosus	United States (c			Tidepool	56.9974	0
UBC 650529	Oligocottus maculosus	United States (c			Tidepool	56.9974	0
UBC 630165	Oligocottus maculosus	United States (c			Tidepool	56.9974	0
UBC 630155	Oligocottus maculosus	United States (c			Tidepool	56.9974	0
UBC 650577	Oligocottus maculosus	United States (c			Tidepool	54.8014	0
UBC 650581	Oligocottus maculosus	United States (c			Tidepool	54.8014	0
UBC 650578	Oligocottus maculosus	United States (c			Tidepool	54.8014	0
UBC 650541	Oligocottus maculosus	United States (c			Tidepool	58.2114	0
UBC 650542	Oligocottus maculosus	United States (c			Tidepool	58.2114	0
UBC 650540	Oligocottus maculosus	United States (c			Tidepool	58.2114	0
UBC 650521	Oligocottus maculosus	United States (c			Tidepool	55.8862	0
UBC 630128	Oligocottus maculosus	United States (c			Tidepool	59.9358	0
UBC 650575	Oligocottus maculosus	United States (c			Tidepool	57.4114	0
UBC 630251	Oligocottus maculosus	United States (c			Tidepool	58.4167	0
UBC 630249	Oligocottus maculosus	United States (c			Tidepool	57.0531	0
UMMZ FISH:64387	Oligocottus maculosus	USA	California	San Matio	Tidepool	37.4988	0
UMMZ FISH:64390	Oligocottus maculosus	USA	California	San Mateo	Tidepool	37.3817	0
UMMZ FISH:93190	Oligocottus maculosus	USA	Oregon	Tillamook	Tidepool	45.7676	0
UMMZ FISH:126492	Oligocottus maculosus	USA	Alaska		Tidepool	57.54	0
UMMZ FISH:186564	Oligocottus maculosus	USA	California	San Mateo	Tidepool	37.5274	0
UMMZ FISH:65408	Oligocottus maculosus	USA	California	Del Norte	Tidepool	41.7558	0
UMMZ FISH:65414	Oligocottus maculosus	USA	California	Marin	Tidepool	37.9094	0
UMMZ FISH:65419	Oligocottus maculosus	USA	California	Marin	Tidepool	37.9094	0
UMMZ FISH:93105	Oligocottus maculosus	USA	Oregon	Tillamook	Tidepool	45.7676	0
UMMZ FISH:93119	Oligocottus maculosus	USA	Oregon	Coos	Tidepool	43.3063	0
UMMZ FISH:93176	Oligocottus maculosus	USA	Washington	Clallam	Tidepool	47.9081	0
UMMZ FISH:93187	Oligocottus maculosus	USA	Washington		Tidepool	47.2362	0
UW 112151	Oligocottus maculosus	USA	WASHINGTON		Tidepool	48.5514	0
UW 119795	Oligocottus maculosus	USA	ALASKA		Tidepool	58.3279	0
UW 934	Oligocottus maculosus	USA	OREGON	COOS	Tidepool	43.3063	0
UW 1162	Oligocottus maculosus	USA	WASHINGTON	SAN JUAN	Tidepool	48.7259	0
UW 1014	Oligocottus maculosus	USA	WASHINGTON	SAN JUAN	Tidepool	48.5514	0
UW 3066	Oligocottus maculosus	USA	ALASKA		Tidepool	55.3422	0
UW 3067	Oligocottus maculosus	USA	ALASKA		Tidepool	55.3422	0
UW 2682	Oligocottus maculosus	USA	ALASKA		Tidepool	59.547	0
UW 1251	Oligocottus maculosus	USA	WASHINGTON	SAN JUAN	Tidepool	48.5514	0
UW 1483	Oligocottus maculosus	USA	WASHINGTON	SAN JUAN	Tidepool	48.5514	0
UW 886	Oligocottus maculosus	USA	OREGON	COOS	Tidepool	43.3063	0
UW 1026	Oligocottus maculosus	USA	WASHINGTON	SAN JUAN	Tidepool	48.5514	0
UW 22435	Oligocottus maculosus	USA	WASHINGTON	CLALLAM	Tidepool	48.2628	0
UW 89	Oligocottus maculosus	USA	WASHINGTON	KING	Tidepool	47.6897	0
UW 1459	Oligocottus maculosus	USA	WASHINGTON	CLALLAM	Tidepool	47.9667	0
LACM Fish:4933	Oligocottus maculosus	United States	Washington	San Juan		48.4806	0
LACM Fish:4914	Oligocottus maculosus	United States	Washington	San Juan		48.5205	0
LACM Fish:33384.011	Oligocottus maculosus	United States	California	Mendocino		38.9271	0
LACM Fish:35324.002	Oligocottus maculosus	United States	California	Mendocino		39.1975	0
LACM Fish:35980.007	Oligocottus maculosus	United States	California	Humboldt		41.1223	0
CAS 47051	Oligocottus maculosus	United States	California			37.6982	0
CAS 47060	Oligocottus maculosus	United States	California			37.6987	0
SIO 63-1065	Oligocottus maculosus	United States	Alaska			59.5	0.1524
SIO 80-18	Oligocottus maculosus	United States	California			35.65	0.1524
SIO 49-120A	Oligocottus maculosus	Canada	British Columbia			49.3167	0.1524
SIO 63-1069	Oligocottus maculosus	United States	Alaska			59.5	0.3048
SIO 63-1066	Oligocottus maculosus	United States	Alaska			59.5	0.3048
CAS 25057	Oligocottus maculosus	United States	California	Humboldt		41.0561	0.3048
CAS 25063	Oligocottus maculosus	United States	California	Humboldt		41.0558	0.3048
SIO 57-170	Oligocottus maculosus	United States	Washington			48.5333	0.3048
CAS 25068	Oligocottus maculosus	United States	California	Del Norte		41.9901	0.57912
CAS 25103	Oligocottus maculosus	United States	California	Del Norte		41.7711	0.6096
UW 11685	Oligocottus maculosus	USA	ALASKA	REVILLAGIGEDO ISLAND		55.4119	0.6096
UMMZ FISH:93118	Oligocottus maculosus	USA	Oregon	Coos		43.3063	0.6096
UMMZ FISH:93257	Oligocottus maculosus	USA	Oregon	Clatsop		45.9031	0.6096
SIO 69-85	Oligocottus maculosus	United States	Alaska			58.3333	0.6096
UW 144	Oligocottus maculosus	USA	WASHINGTON	KING		47.6062	0.9144
CAS 29682	Oligocottus maculosus	United States	California	Humboldt		40.0225	0.9144
CAS 29695	Oligocottus maculosus	United States	California	Humboldt		40.0211	0.9144
CAS 29498	Oligocottus maculosus	United States	California	Mendocino		39.3186	0.9144
CAS 29529	Oligocottus maculosus	United States	California	Mendocino		39.6578	0.9144
SU 49542	Oligocottus maculosus	United States	California	San Mateo		37.5274	0.9144
SIO 61-12	Oligocottus maculosus	United States	California			37.5667	0.9144
CAS 78133	Oligocottus maculosus	Canada	British Columbia			50.5667	1
OS Fishes:3187	Oligocottus maculosus	United States	Oregon	Lincoln County		44.6737	1
UW 151648	Oligocottus maculosus	CANADA	BRITISH COLUMBIA			50.71	1
UW 816	Oligocottus maculosus	USA	WASHINGTON	WHATCOM		48.9937	1.0668
UW 550	Oligocottus maculosus	USA	WASHINGTON	SAN JUAN		48.5514	1.2192
UW 743	Oligocottus maculosus	USA	WASHINGTON	SAN JUAN		48.6331	1.2192
UW 151192	Oligocottus maculosus	USA	WASHINGTON	KITSAP		47.6417	1.5
UW 151193	Oligocottus maculosus	USA	WASHINGTON	KITSAP		47.6417	1.5
UW 151194	Oligocottus maculosus	USA	WASHINGTON	KITSAP		47.6404	1.5
OS Fishes:18334	Oligocottus maculosus	United States	Washington	Kitsap County		47.6404	1.5
OS Fishes:18782	Oligocottus maculosus	United States	Washington	Kitsap County		47.6417	1.5
UW 2133	Oligocottus maculosus	USA	WASHINGTON	SAN JUAN		48.5394	1.524
CAS 29336	Oligocottus maculosus	United States	California	Mendocino		39.6278	1.6764
UW 156474	Oligocottus maculosus	USA	WASHINGTON	CLALLAM		48.1148	2
CAS 43138	Oligocottus maculosus	United States	Alaska			58.2189	3
SIO 92-132	Oligocottus maculosus	Canada	British Columbia			50.565	3
UW 1115	Oligocottus maculosus	USA	WASHINGTON	SAN JUAN		48.5394	3.048
UW 156376	Oligocottus maculosus	USA	ALASKA			56.9286	4
UW 1129	Oligocottus maculosus	USA	WASHINGTON	SAN JUAN		48.5514	4.572
UW 1106	Oligocottus maculosus	USA	WASHINGTON	SAN JUAN		48.5626	6.096
UW 153499	Oligocottus maculosus	USA	WASHINGTON	SAN JUAN		48.4869	10.9728
UW 724	Oligocottus maculosus	USA	WASHINGTON	SAN JUAN		48.4869	36.576
SU 68343	Oligocottus maculosus	United States	California			33.0069	43.8912
UW 1295	Oligocottus maculosus	USA	WASHINGTON	SAN JUAN		48.573	45.72
LACM Fish:51789.013	Oligocottus rimensis	United States	California	San Luis Obispo	Tidepool	35.636	0
LACM Fish:31972.007	Oligocottus rimensis	United States	California	Mendocino	Tidepool	39.4252	0
LACM Fish:9950.022	Oligocottus rimensis	United States	California	San Luis Obispo		35.636	0
LACM Fish:32671.009	Oligocottus rimensis	United States	California	San Luis Obispo		35.2162	0
LACM Fish:52244.018	Oligocottus rimensis	United States	California	San Luis Obispo		35.6505	0
LACM Fish:52248.026	Oligocottus rimensis	United States	California	Monterey		35.9117	0
CAS 47057	Oligocottus rimensis	United States	California			37.6987	0
SU 48895	Oligocottus rimensis	United States	California	San Luis Obispo	Tidepool	35.5792	0
CAS 19105	Oligocottus rimensis	United States	California	Mendocino	Tidepool	38.8012	0
CAS 28827	Oligocottus rimensis	United States	California	Mendocino	Tidepool	38.9167	0
CAS 212726	Oligocottus rimensis	United States	California	Monterey	Tidepool	36.4483	0
SU 47509	Oligocottus rimensis	United States	California	Monterey	Tidepool	36.1906	0
CAS 78465	Oligocottus rimensis	United States	California	San Mateo	Tidepool	37.1819	0
CAS 27308	Oligocottus rimensis	United States	California	Sonoma	Tidepool	38.4069	0
CAS 28304	Oligocottus rimensis	United States	California	Sonoma	Tidepool	38.5649	0
LACM Fish:2586	Oligocottus rimensis	United States	California	Monterey	Tidepool	36.4535	0
SIO 07-186	Oligocottus rimensis	United States	California		Tidepool	36.6002	0
UAM_2955	Oligocottus rimensis	USA	AK	Sitka, Japonski Island	Tidepool	57.056	0
UAM_2964	Oligocottus rimensis	USA	AK	Sitka, Japonski Island	Tidepool	57.056	0
UAM_2945	Oligocottus rimensis	USA	AK	Sitka, Japonski Island	Tidepool	57.056	0
UBC 900181	Oligocottus rimensis	Canada			Tidepool	48.8507	0
UBC 900084	Oligocottus rimensis	Canada			Tidepool	48.8507	0
UBC 900177	Oligocottus rimensis	Canada			Tidepool	48.8507	0
UBC 900070	Oligocottus rimensis	Canada			Tidepool	48.8507	0
UBC 900180	Oligocottus rimensis	Canada			Tidepool	48.8507	0
UBC 900141	Oligocottus rimensis	Canada			Tidepool	48.8507	0
UBC 900098	Oligocottus rimensis	Canada			Tidepool	48.8507	0
UBC 900188	Oligocottus rimensis	Canada			Tidepool	48.8507	0
UBC 900057	Oligocottus rimensis	Canada			Tidepool	48.8507	0
UBC 900145	Oligocottus rimensis	Canada			Tidepool	48.8507	0
UBC 900060	Oligocottus rimensis	Canada			Tidepool	48.8507	0
UBC 900059	Oligocottus rimensis	Canada			Tidepool	48.8507	0
UBC 900046	Oligocottus rimensis	Canada			Tidepool	48.8507	0
UBC 900049	Oligocottus rimensis	Canada			Tidepool	48.8507	0
UBC 900032	Oligocottus rimensis	Canada			Tidepool	48.8507	0
UBC 900011	Oligocottus rimensis	Canada			Tidepool	48.8507	0
UBC 900027	Oligocottus rimensis	Canada			Tidepool	48.8507	0
UBC 620878	Oligocottus rimensis	Canada			Tidepool	48.4307	0
UBC 620854	Oligocottus rimensis	Canada			Tidepool	48.4284	0
UBC 650581	Oligocottus rimensis	United States (c			Tidepool	54.8014	0
UMMZ FISH:142396	Oligocottus rimensis	USA	California	Monterey	Tidepool	37.2167	0
UMMZ FISH:65372	Oligocottus rimensis	USA	California	Monterey	Tidepool	36.5419	0
UMMZ FISH:65377	Oligocottus rimensis	USA	California	Del Norte	Tidepool	41.7558	0
UW 1266	Oligocottus rimensis	USA	WASHINGTON	SAN JUAN	Tidepool	48.5514	0
UW 22437	Oligocottus rimensis	USA	WASHINGTON	CLALLAM	Tidepool	48.2628	0
UW 1141	Oligocottus rimensis	USA	WASHINGTON	SAN JUAN	Tidepool	48.5514	0
UW 1469	Oligocottus rimensis	USA	WASHINGTON	SAN JUAN	Tidepool	48.5514	0
UW 1249	Oligocottus rimensis	USA	WASHINGTON	SAN JUAN	Tidepool	48.5514	0
UW 898	Oligocottus rimensis	USA	OREGON	COOS	Tidepool	43.3063	0
UW 22438	Oligocottus rimensis	USA	WASHINGTON	CLALLAM	Tidepool	48.2628	0
UW 1460	Oligocottus rimensis	USA	WASHINGTON	CLALLAM	Tidepool	47.9667	0
SIO 80-21	Oligocottus rimensis	United States	California			35.6667	0.3048
CAS 29824	Oligocottus rimensis	United States	California	Sonoma		38.505	0.3048
CAS 27806	Oligocottus rimensis	United States	California	Mendocino		38.9089	0.4572
UMMZ FISH:93169	Oligocottus rimensis	USA	Oregon	Coos		43.3063	0.6096
CAS 29499	Oligocottus rimensis	United States	California	Mendocino		39.3186	0.9144
CAS 29530	Oligocottus rimensis	United States	California	Mendocino		39.6578	0.9144
SIO 72-89	Oligocottus rimensis	United States	California			35.65	0.9144
CAS 29337	Oligocottus rimensis	United States	California	Mendocino		39.6278	1.6764
SIO 67-151	Oligocottus rimensis	United States	California			35.65	3.6576
SIO 45-215B	Oligocottus rubellio	Mexico	Baja California		Tidepool	31.54	0
SIO 47-201B	Oligocottus rubellio	Mexico	Baja California		Tidepool	31.55	0
SIO 47-89	Oligocottus rubellio	United States	California		Tidepool	34.06	0
SIO 47-17	Oligocottus rubellio	United States	California		Tidepool	32.7083	0
SIO 47-201C	Oligocottus rubellio	Mexico	Baja California		Tidepool	31.55	0
SIO 45-52	Oligocottus rubellio	United States	California		Tidepool	36.1833	0
SIO 47-205B	Oligocottus rubellio	Mexico	Baja California		Tidepool	31.55	0
SIO 47-90	Oligocottus rubellio	United States	California		Tidepool	34.06	0
SIO 47-81	Oligocottus rubellio	United States	California		Tidepool	34.055	0
SIO 49-175	Oligocottus rubellio	Mexico	Baja California		Tidepool	31.475	0
SIO 45-87	Oligocottus rubellio	United States	California		Tidepool	32.8083	0
SIO 45-83	Oligocottus rubellio	Mexico	Baja California		Tidepool	32.055	0
SIO 47-88	Oligocottus rubellio	United States	California		Tidepool	34.06	0
SIO 45-217A	Oligocottus rubellio	Mexico	Baja California		Tidepool	31.53	0
SIO 49-174B	Oligocottus rubellio	Mexico	Baja California		Tidepool	31.4667	0
SIO 50-282	Oligocottus rubellio	Mexico	Baja California		Tidepool	31.4667	0
SIO 44-43	Oligocottus rubellio	United States	California		Tidepool	33.7367	0
SIO 47-77	Oligocottus rubellio	United States	California		Tidepool	34.0567	0
SIO 45-215C	Oligocottus rubellio	Mexico	Baja California		Tidepool	31.54	0
SIO 47-201A	Oligocottus rubellio	Mexico	Baja California		Tidepool	31.55	0
SIO 46-130	Oligocottus rubellio	Mexico	Baja California		Tidepool	32.4	0
SIO 49-174A	Oligocottus rubellio	Mexico	Baja California		Tidepool	31.4667	0
SIO 47-8	Oligocottus rubellio	Mexico	Baja California		Tidepool	32.42	0
SIO 47-204	Oligocottus rubellio	Mexico	Baja California		Tidepool	31.55	0
SIO 50-285	Oligocottus rubellio	Mexico	Baja California		Tidepool	31.8667	0
SIO 45-219A	Oligocottus rubellio	Mexico	Baja California		Tidepool	31.545	0
SIO 45-55	Oligocottus rubellio	United States	California		Tidepool	36.4467	0
[truncated: 524 more rows]
