# Supplementary material for: Littorally adaptive? Testing the link between habitat, morphology, and reproduction in the intertidal sculpin subfamily Oligocottinae (Pisces: Cottoidea)
Source: PeerJ. 2017 Aug 10;5:e3634. doi: 10.7717/peerj.3634 (PMC5554603; doi:10.7717/peerj.3634)
Supplement: Table S4 — Microsoft Excel (xlsx) format. Catalog numbers, depth, and locality data are provided in Table S2. [file peerj-05-3634-s014.xlsx]

## Sheet: Sheet1
Supplementary Table 4: Summary of collection depth data for museum records of oligocottine sculpins and the outgroup taxon Chitonotus pugetensis. Catalog numbers, depth, and locality data are provided in Supplementary Table 2. "Littorally adaptive? Testing the link between habitat, morphology, and reproduction in the intertidal sculpin subfamily Oligocottinae (Pisces: Cottoidea)" by T.J. Buser, M…
Taxon	# Museum Lots	% 0 m Collection Depth	Median Collection Depth (m)	Min recorded depth	Max recorded depth	95% Depth Range min (m)	95% Depth Range max (m)		Column Descriptions
Artedius corallinus	78	26	8	0	30	0	27		# Museum Lots = The number of lots for each species that contained collection data and were included in our analysis
Artedius fenestralis	86	45	1	0	168	0	52		% 0 m Collection Depth = Of the museum lots that contained depth data, the percentage where the depth was listed as "0 meters," "tide pool," "intertidal," or the like.
Artedius harringtoni	111	52	0	0	46	0	18		Median Collection Depth (m) = the median collection depth in meters.
Artedius lateralis	284	73	0	0	34	0	6		Min recorded depth = the minimum recorded collection depth in meters.
Artedius notospilotus	53	26	6	0	22	0	20		Max recorded depth = the maximum recorded collection depth in meters.
Chitonotus pugetensis	165	0	44	5	200	7	137		95% Depth Range min (m) = To avoid the influence of outliers in our analysis, we selected for each speciesa depth range that includes 95% of museum collection depths for each species. For species with a high (>25%) occurrence of intertidal collection depths, we set 0 m. For all others, we discarded the shallowest 2.5% of collection depths and used the resultant minimum collection depth in meters.
Clinocottus acuticeps	100	87	0	0	9	0	1		95% Depth Range max (m) = To avoid the influence of outliers in our analysis, we selected for each speciesa depth range that includes 95% of museum collection depths for each species. For species with a high (>25%) occurrence of intertidal collection depths, we selected the shallowest depth that includes 95% of museum collections as the maximum. For all others we discarded the deepest 2.5% of col…
Clinocottus analis	353	53	0	0	73	0	6
Clinocottus embryum	114	95	0	0	8	0	0
Clinocottus globiceps	168	88	0	0	2	0	1
Clinocottus recalvus	106	70	0	0	34	0	2
Leiocottus hirundo	28	7	11	0	37	0	26
Oligocottus maculosus	262	83	0	0	46	0	2
Oligocottus rimensis	60	85	0	0	4	0	1
Oligocottus rubellio	115	50	0	0	34	0	8
Oligocottus snyderi	349	75	0	0	34	0	1
Orthonopias triacis	87	36	6	0	30	0	27
